# Supplementary material for: Trends in, projections of, and inequalities in reproductive, maternal, newborn and child health service coverage in Vietnam 2000-2030: A Bayesian analysis at national and sub-national levels
Source: PubMed Central journal article supplement — Lancet Reg Health West Pac. 2021 Jul 30;15:100230. doi: 10.1016/j.lanwpc.2021.100230 (PMC8342952; doi:10.1016/j.lanwpc.2021.100230), 2021-07-30
Supplement: mmc1.pdf [file mmc1.pdf]

## Supplementary

### **Trends in, projections of, and inequalities in reproductive, maternal, newborn and child health service coverage in Vietnam 2000-2030: A Bayesian analysis at national and sub-national levels**

#### **Authors:**

Phuong T. Nguyen<sup>1,2†</sup>, Md Shafiur Rahman<sup>3</sup>, Phuong Mai Le<sup>1</sup>, Huy Van Nguyen<sup>1,4</sup>, Vu Duy Kien<sup>5</sup>, Hoa L. Nguyen<sup>6</sup>, An Thi Minh Dao<sup>7</sup>, Long Quynh Khuong<sup>8</sup>, Minh Van Hoang<sup>8</sup>, Stuart Gilmour<sup>1</sup>

#### **Affiliations**

<sup>1</sup> Graduate School of Public Health, St. Luke's International University, Tokyo, Japan

<sup>2</sup> Division of Cancer Statistics Integration, Center for Cancer Control and Information Services, National Cancer Center, Tokyo, Japan

<sup>3</sup> Research Center for Child Mental Development, Hamamatsu University School of Medicine, Hamamatsu, Japan

<sup>4</sup> Innovation Health and Transformation Centre, Federation University, Australia

<sup>5</sup> OnCare Medical Technology Company Limited, Hanoi, Vietnam

<sup>6</sup> Department of Population and Quantitative Health Sciences, University of Massachusetts Medical School, Massachusetts, USA

<sup>7</sup> Institution for Preventive Medicine and Public Health, Hanoi Medical University, Hanoi, Vietnam

<sup>8</sup> Hanoi University of Public Health, Hanoi, Vietnam

## Table of contents

|                                                                                                                      |    |
|----------------------------------------------------------------------------------------------------------------------|----|
| Table of contents.....                                                                                               | 2  |
| Table S1: Description of the Included Surveys .....                                                                  | 3  |
| Table S2: List of reproductive, maternal, newborn and child health (RMNCH) service indicators and data sources ..... | 4  |
| Methods.....                                                                                                         | 5  |
| 1. Bayesian models .....                                                                                             | 5  |
| 2. Inequality Analysis .....                                                                                         | 6  |
| 2.1. Assessment of Socioeconomic status.....                                                                         | 6  |
| 2.2. Calculation of Relative index of inequality and Slope index of inequality .....                                 | 6  |
| 2.3. Calculation of Concentration index .....                                                                        | 6  |
| 2.4. Pattern of Inequality.....                                                                                      | 6  |
| Table S3: Model comparison using leave-one-out cross-validation for wealth index .....                               | 7  |
| Table S4: Model comparison using leave-one-out cross-validation for living area .....                                | 8  |
| Table S5: Model comparison using leave-one-out cross-validation for regional levels .....                            | 9  |
| Table S6: Sensitivity analysis of composite methods in observed data by wealth quintiles, 2000–2014.....             | 10 |
| Table S7: Sensitivity analysis of composite methods in observed data by living areas, 2000–2014.....                 | 11 |
| Table S8: Sensitivity analysis of composite methods in observed data by regional levels, 2000–2014.....              | 12 |
| Table S9: Observed coverage of RMNCH service in Vietnam by wealth quintiles, 2000–2014.....                          | 14 |
| Table S10: Predicted coverage of RMNCH service in Vietnam by wealth quintiles, 2015–2030.....                        | 16 |
| Table S11: Observed coverage of RMNCH service in Vietnam by living areas, 2000–2014 .....                            | 18 |
| Table S12: Predicted coverage of RMNCH service in Vietnam by living areas, 2015–2030.....                            | 19 |
| Table S13: Observed coverage of RMNCH service in Vietnam by regional levels, 2000–2014.....                          | 20 |
| Table S14: Predicted coverage of RMNCH service in Vietnam by regional levels, 2015–2020.....                         | 23 |
| Table S15: Average annual percent of change in RMNCH service indicators in different periods .....                   | 26 |
| Table S16: National health inequality analyses of all RMNCH service indicators for all survey years .....            | 27 |
| Table S17: Socioeconomic inequality in RMNCH service for all survey years stratifying by living areas .....          | 31 |
| Table S18: Changes in inequality of RMNCH service coverage in Vietnam (2000–2014).....                               | 33 |
| Table S19: Changes in Socioeconomic inequality in RMNCH service, 2000-2014, stratifying by living areas ....         | 34 |
| Table S20: Sensitivity analysis of change in trends by matching DHS recall periods.....                              | 35 |
| Fig. S1: Trends in and projections of coverage of composite prevention index .....                                   | 36 |
| Fig. S2: Trends in and projections of coverage of composite treatment index .....                                    | 37 |
| Fig. S3: Trends in and projections of coverage of at least one ANC visit.....                                        | 38 |
| Fig. S4: Trends in and projections of coverage of at least four ANC visit.....                                       | 39 |
| Fig. S5: Trends in and projections of coverage of Exclusive breastfeeding.....                                       | 40 |
| Fig. S6: Trends in and projections of coverage of Family planning needs satisfied .....                              | 41 |
| Fig. S7: Trends in and projections of coverage of BCG Immunization .....                                             | 42 |
| Fig. S8: Trends in and projections of coverage of DPT3 Immunization .....                                            | 43 |
| Fig. S9: Trends in and projections of coverage of Polio3 Immunization .....                                          | 44 |
| Fig. S10: Trends in and projections of coverage of Measles Immunization .....                                        | 45 |
| Fig. S11: Trends in and projections of coverage of Full Immunization .....                                           | 46 |
| Fig. S12: Trends in and projections of coverage of Improved water .....                                              | 47 |
| Fig. S13: Trends in and projections of coverage of Adequate sanitation .....                                         | 48 |
| Fig. S14: Trends in and projections of coverage of Institutional delivery .....                                      | 49 |
| Fig. S15: Trends in and projections of coverage of Skilled birth attendance.....                                     | 50 |
| Fig. S16: Trends in and projections of coverage of Care seeking for pneumonia.....                                   | 51 |
| Fig. S17: Trends in and projections of coverage of ARI treatment.....                                                | 52 |
| Fig. S18: Trends in and projections of coverage of Oral rehydration therapy .....                                    | 53 |
| Fig. S19: Trends in and projections of coverage of Early initiation of breastfeeding .....                           | 54 |
| Fig. S20: RMNCH service in Vietnam in year 2014 and 2030 by regional levels.....                                     | 55 |
| References:.....                                                                                                     | 56 |

**Table S1: Description of the Included Surveys**

| Sources of data                                   | Survey year | Sampling design               | Sample households | Response Rate |
|---------------------------------------------------|-------------|-------------------------------|-------------------|---------------|
| Vietnam Demographic and Health Survey (VDHS)      | 2002        | Two-stage stratified sampling | 7048              | 99.9%         |
| Vietnam Multiple Indicator Cluster Survey (VMICS) | 2000        | Two-stage stratified sampling | 7628              | 100%          |
| Vietnam Multiple Indicator Cluster Survey (VMICS) | 2006        | Two-stage stratified sampling | 8355              | 100%          |
| Vietnam Multiple Indicator Cluster Survey (VMICS) | 2011        | Two-stage stratified sampling | 11614             | 99.8%         |
| Vietnam Multiple Indicator Cluster Survey (VMICS) | 2013-2014   | Two-stage stratified sampling | 9979              | 99.6%         |
| <b>Total</b>                                      |             |                               | <b>44624</b>      |               |

Note: VDHS=Vietnam Demographic and Health Survey; VMICS=Vietnam Multiple Indicator Cluster Survey; VLSS=Vietnam Living Standard Survey; VGATS=Vietnam Global Adult Tobacco Survey

**Table S2: List of reproductive, maternal, newborn and child health (RMNCH) service indicators and data sources**

| Indicator                         | Definition*                                                                                                                                                                                                                    | Data sources                                 |
|-----------------------------------|--------------------------------------------------------------------------------------------------------------------------------------------------------------------------------------------------------------------------------|----------------------------------------------|
| <b>Promotion and prevention</b>   |                                                                                                                                                                                                                                |                                              |
| Improved water                    | The proportion of households whose main source of drinking water is an improved source.                                                                                                                                        | VDHS 2002; VMICS 2000, 2006, 2011, 2013-2014 |
| Adequate sanitation               | The proportion of households with improved toilet facilities.                                                                                                                                                                  | VDHS 2002; VMICS 2000, 2006, 2011, 2013-2014 |
| Family planning needs satisfied   | The proportion of currently married women aged 15-49 who do not want any more children or want to wait two or more years before having another child and are using contraception                                               | VDHS 2002; VMICS 2011, 2013-2014             |
| Early initiation of breastfeeding | The proportion of newborns breastfed within 1 hour of birth in a specified time period.                                                                                                                                        | VDHS 2002; VMICS 2006, 2011, 2013-2014       |
| At least one ANC visit            | The proportion of women aged 15-49 years who received at least one visit from a skilled health provider during their last pregnancy.                                                                                           | VDHS 2002; VMICS 2000, 2006, 2011, 2013-2014 |
| At least four ANC visits          | The proportion of women aged 15-49 years who received at least four visits from any provider during their last pregnancy.                                                                                                      | VDHS 2002; VMICS 2011, 2013-2014             |
| DPT3 immunization                 | The proportion of children aged 12-23 months who received three doses of diphtheria, pertussis, and tetanus vaccine.                                                                                                           | VDHS 2002; VMICS 2000, 2006, 2011, 2013-2014 |
| Measles immunization              | The proportion of children aged 12-23 months currently vaccinated against measles.                                                                                                                                             | VDHS 2002; VMICS 2000, 2006, 2011, 2013-2014 |
| BCG immunization                  | The proportion of children aged 12-23 months who received one dose of BCG vaccine.                                                                                                                                             | VDHS 2002; VMICS 2000, 2006, 2011, 2013-2014 |
| Polio3 immunization               | The proportion of children aged 12-23 months who received three doses of polio vaccine.                                                                                                                                        | VDHS 2002; VMICS 2000, 2006, 2011, 2013-2014 |
| Fully immunized children          | The proportion of children aged 12-23 months who received three doses of DPT and Polio vaccines and one dose of BCG and measles vaccines                                                                                       | VDHS 2002; VMICS 2000, 2006, 2011, 2013-2014 |
| Exclusive breastfeeding           | The proportion of youngest children under six months of age living with the mother who are exclusively breastfed.                                                                                                              | VDHS 2002; VMICS 2000, 2006, 2011, 2013-2014 |
| <b>Treatment Indicators</b>       |                                                                                                                                                                                                                                |                                              |
| Skilled birth attendance          | The proportion of mothers who had their delivery assisted by a skilled health professional.                                                                                                                                    | VDHS 2002; VMICS 2000, 2006, 2011, 2013-2014 |
| Institutional delivery            | The proportion of women that had their birth taking place in health facility                                                                                                                                                   | VDHS 2002; VMICS 2006, 2011, 2013-2014       |
| Care seeking for pneumonia        | The proportion of children under 5 with suspected pneumonia who sought care from an appropriate health provider in the previous two weeks.                                                                                     | VDHS 2002; VMICS 2000, 2006, 2011, 2013-2014 |
| ARI treatment                     | The proportion of under five children who had presumed pneumonia (last episode) in the previous two weeks were treated with antibiotics                                                                                        | VMICS 2000, 2006, 2011, 2013-2014            |
| Oral rehydration therapy          | The proportion of under five children with diarrhea in the previous two weeks who received oral rehydration therapy (packets of oral rehydration salts, recommended home solution, or increased fluids) and continued feeding. | VDHS 2002; VMICS 2000, 2006, 2011, 2013-2014 |

Note: VDHS=Vietnam Demographic and Health Survey; VMICS=Vietnam Multiple Indicator Cluster Survey; ANC=Antenatal care; DPT=three doses of diphtheria, pertussis, and tetanus vaccine; BCG=Bacillus Calmette–Guérin vaccine; Polio3=three doses of polio vaccine; ARI=Acute Respiratory Infections; \*All definitions and measurement adapted from the global monitoring report on universal health coverage.<sup>1,2</sup>

## Methods

### 1. Bayesian models

We defined  $y_i$  as the logit transformed value of the proportion of an indicator  $p_i$

$$y_i = \text{logit}(p_i) = \ln\left(\frac{p_i}{1-p_i}\right); \quad i = 1, \dots, n$$

$$y_i \sim \text{Normal}(\mu_i, \sigma^2)$$

$$\mu_i = \alpha + \beta X'_i$$

Where,  $X'$  is a vector of predictors – time, wealth quintile dummies or interaction terms between time and wealth quintile.

The prior for model parameters were specified as:

$$\alpha \sim \text{Student}_3(\text{median}(y_i), 10)$$

$$\beta \sim 1 \text{ (flat)}$$

and

$$\sigma \sim \text{Student}_3(0, 10)$$

We can then extend this model to a classical mixed model with random effects by introducing random effects for the slope and intercept. To allow each region  $j$  to have a unique intercept for different means with others, we added  $\alpha_j$  to the model. Similarly, we used a varying slope to indicate that each region is allowed to have a different trend line in our outcomes with others. To explore the differences of outcomes between regions for each year (random effect intercepts and random effect slopes). We evaluated this correlation by  $\alpha$  region and  $\beta$  region as specified on the following model:

$$\mu_{ij} = \alpha + \alpha_j + (\beta + \beta_j)x_{ij}$$

$$\begin{bmatrix} \alpha_j \\ \beta_j \end{bmatrix} \sim \text{MVNormal} \left( \begin{bmatrix} 0 \\ 0 \end{bmatrix}, S \right)$$

$$S = \begin{pmatrix} \sigma_{\alpha_j}^2 & \sigma_{\alpha_j} \sigma_{\beta_j} \rho \\ \sigma_{\alpha_j} \sigma_{\beta_j} \rho & \sigma_{\beta_j}^2 \end{pmatrix}$$

In which the first two lines described the likelihood function. To ensure the prior was non-informative, we gave  $\alpha$  and  $\beta$  the  $\text{Normal}(0, 4)$  prior, which allows  $\alpha$  and  $\beta$  to mostly lie in a large range between -10 and 10. The residual variation  $\sigma$  was given a Half-Cauchy before restricting the distribution to positive values.<sup>3</sup>  $\mathbf{M}$  is the correlation matrix, and  $\rho$  is the correlation between intercepts and slopes. This matrix was set to an LKJ-Correlation prior.<sup>4</sup>

## 2. Inequality Analysis

### 2.1. Assessment of Socioeconomic status

We performed inequality analyses based on household socioeconomic status, which was measured by the asset-based wealth index or level of household consumption depending on the available variables in each survey.

The Demographic and health surveys (DHS) and Multiple indicator cluster surveys (MICS) already had information on asset-based wealth index for each household, which was estimated by the survey authority using principal component analysis (PCA) on available information of housing assets and access to services. The wealth index then was created by ranking the wealth score to quintiles from the lowest 20% (poorest) to the highest 20% (wealthiest).

### 2.2. Calculation of Relative index of inequality and Slope index of inequality

Since the separately using relative and absolute indicator may lead to different results and conclusions, it is essential to use both indicators to provide a comprehensive picture of inequalities.<sup>5</sup> We adopted the slope index of inequality (SII) as an absolute term and the relative index of inequality (RII) as a relative term using regression models against households' relative rank in the cumulative distribution of wealth index.<sup>6,7</sup> The SII indicates the difference in percentage points of health coverage between the wealthier and poorer households. On the other hand, the RII presents the ratio of health coverage between the top and bottom of socioeconomic status. Regarding the inequalities in the health coverage of regional levels, we sorted the regions by coverage of RMNCH services. Thus, the SII and RII of regional levels indicate the differences in absolute and relative terms of health service coverage between the highest coverage and the lowest coverage regions. Similarly, the SII and RII of urban-rural areas indicate the difference in absolute and relative terms of health service coverage between urban and rural areas.

### 2.3. Calculation of Concentration index

The concentration index (CnI) is twice the covariance between a health indicator and its fractional rank divided by the health indicator's mean.<sup>8</sup>

$$CnI = \frac{2 \text{Cov}(y_i, R_i)}{\mu} = \frac{1}{n} \sum_{i=1}^n \left[ \frac{y_i}{\mu} (2R_i - 1) \right]$$

Where  $y$  is the health indicator,  $\mu$  is its mean,  $R_i$  is the  $i^{\text{th}}$  individual's fractional rank in the wealth quintile distribution. The CnI can also be obtained from a simple least square regression (OLS) of transforming the variable of interest on its fractional rank. The CnI is the least-squares estimate of  $\beta$  in the model

$$2\sigma_R^2 \frac{y_i}{\mu} = \alpha + \beta R_i + \varepsilon$$

Where  $\sigma_R^2$  is the variance of R

We estimated the CnI to determine the magnitude or extent of health inequality by regressing against the fractional rank of households' wealth index.<sup>8,9</sup> The CnI ranges from -1 to 1 with a positive value indicating a higher concentration of health coverage among the richer group, and vice versa for a negative value. The closer value to 1 or -1, the higher degree of concentration. A zero value (0) of the CnI shows the unavailability of inequality in the health indicator.

### 2.4. Pattern of Inequality

We evaluated inequality patterns by using plots of wealth quintile-specific coverages and categorized them according to Victora et al.,<sup>10</sup> and The World Health Report.<sup>11</sup> The top inequality patterns are usually in low-coverage countries, with the wealthiest quintile much more advanced than the rest. Linear patterns of inequality (or queuing) are observed as increasing national coverage from top patterns with similar distances between quintile groups. As the national coverage reaches a higher level, the bottom inequality patterns commonly occur, with the poorest lagging behind others.

**Table S3: Model comparison using leave-one-out cross-validation for wealth index**

| Model                             | Model with interaction |        |         | Model without interaction |        |         | Difference in LOOIC | Interaction term used |
|-----------------------------------|------------------------|--------|---------|---------------------------|--------|---------|---------------------|-----------------------|
|                                   | ELPD                   | P_LOO  | LOOIC   | ELPD                      | P_LOO  | LOOIC   |                     |                       |
| At least one ANC visit            | -85.3                  | 19.5   | 170.6   | -102.8                    | 21.2   | 205.6   | -35.0               | Yes                   |
| At least four ANC visit           | -66.2                  | 15.5   | 132.5   | -83.9                     | 20.3   | 167.8   | -35.3               | Yes                   |
| Exclusive breastfeeding           | -69.0                  | 9.9    | 138.0   | -73.3                     | 8.6    | 146.5   | -8.5                | Yes                   |
| Early initiation of breastfeeding | -316.4                 | 112.9  | 632.7   | -297.5                    | 82.6   | 595.1   | 37.6                | No                    |
| Family planning needs satisfied   | -67.5                  | 8.0    | 135.0   | -80.7                     | 13.8   | 161.3   | -26.4               | Yes                   |
| BCG immunization                  | -96.4                  | 24.2   | 192.8   | -94.0                     | 18.5   | 187.9   | 4.9                 | No                    |
| DPT3 immunization                 | -194.2                 | 72.0   | 388.4   | -178.9                    | 48.5   | 357.9   | 30.6                | No                    |
| Polio3 immunization               | -342.5                 | 153.4  | 685.1   | -314.7                    | 101.0  | 629.5   | 55.6                | No                    |
| Measles immunization              | -120.6                 | 32.6   | 241.2   | -114.9                    | 21.8   | 229.8   | 11.4                | No                    |
| Full immunization                 | -251.3                 | 101.7  | 502.5   | -235.1                    | 68.9   | 470.3   | 32.3                | No                    |
| Improved Water                    | -4745.9                | 1070.8 | 9491.7  | -4851.9                   | 925.3  | 9703.7  | -212.0              | Yes                   |
| Adequate sanitation               | -8427.1                | 1520.8 | 16854.3 | -9536.6                   | 1385.6 | 19073.2 | -2219.0             | Yes                   |
| Institutional delivery            | -90.5                  | 28.0   | 181.0   | -106.1                    | 29.1   | 212.2   | -31.2               | Yes                   |
| Skilled birth attendance          | -301.7                 | 118.0  | 603.3   | -300.2                    | 95.7   | 600.5   | 2.8                 | No                    |
| Care seeking for pneumonia        | -93.1                  | 25.7   | 186.1   | -85.2                     | 15.9   | 170.4   | 15.8                | No                    |
| ARI treatment                     | -45.1                  | 12.1   | 90.3    | -40.5                     | 6.9    | 81.1    | 9.2                 | No                    |
| Oral rehydration therapy          | -104.8                 | 21.4   | 209.6   | -98.6                     | 15.0   | 197.2   | 12.4                | No                    |
| Composite Prevention (meta)       | -148.7                 | 41.0   | 297.3   | -157.4                    | 40.7   | 314.8   | -17.5               | Yes                   |
| Composite Treatment (meta)        | -117.6                 | 32.8   | 235.3   | -110.0                    | 19.8   | 220.0   | 15.3                | No                    |
| Composite Coverage (meta)         | -319.3                 | 126.3  | 638.5   | -317.2                    | 90.2   | 634.4   | 4.1                 | No                    |
| Composite Prevention (ari)        | -132.0                 | 31.9   | 264.0   | -130.7                    | 26.3   | 261.4   | 2.5                 | No                    |
| Composite Treatment (ari)         | -98.1                  | 20.8   | 196.2   | -92.1                     | 12.4   | 184.3   | 11.9                | No                    |
| Composite Coverage (ari)          | -278.1                 | 105.7  | 556.2   | -274.0                    | 75.0   | 548.1   | 8.1                 | No                    |
| Composite Prevention (geo)        | -124.4                 | 26.7   | 248.8   | -139.4                    | 31.9   | 278.7   | -29.9               | Yes                   |
| Composite Treatment (geo)         | -98.5                  | 20.6   | 197.0   | -93.0                     | 12.8   | 186.0   | 11.0                | No                    |
| Composite Coverage (geo)          | -276.7                 | 104.7  | 553.4   | -271.5                    | 75.0   | 543.1   | 10.4                | No                    |

Note: LOOIC=Leave one out Criteria Information; ELPD=Expected Log Predictive Density; P\_LOO=Effective number of parameters; meta=Meta-analysis random effects; ari=Arithmetic Means; geo=Geometric Means

**Table S4: Model comparison using leave-one-out cross-validation for living area**

| Model                             | Model with interaction |       |         | Model without interaction |       |         | Difference in LOOIC | Interaction term used |
|-----------------------------------|------------------------|-------|---------|---------------------------|-------|---------|---------------------|-----------------------|
|                                   | ELPD                   | P_LOO | LOOIC   | ELPD                      | P_LOO | LOOIC   |                     |                       |
| At least one ANC visit            | -64.8                  | 20.6  | 129.6   | -66.2                     | 21.9  | 132.4   | 2.9                 | No                    |
| At least four ANC visit           | -30.8                  | 6.3   | 61.6    | -32.3                     | 7.6   | 64.6    | 2.9                 | No                    |
| Exclusive breastfeeding           | -33.3                  | 4.7   | 66.6    | -35.1                     | 6.3   | 70.3    | 3.7                 | No                    |
| Early initiation of breastfeeding | -248.3                 | 76.8  | 496.7   | -255.6                    | 85.7  | 511.2   | 14.5                | No                    |
| Family planning needs satisfied   | -27.3                  | 1.5   | 54.6    | -28.2                     | 2.2   | 56.4    | 1.8                 | No                    |
| BCG immunization                  | -59.6                  | 15.1  | 119.2   | -61.4                     | 17.2  | 122.8   | 3.6                 | No                    |
| DPT3 immunization                 | -158.3                 | 64.2  | 316.7   | -155.6                    | 65.9  | 311.2   | -5.4                | Yes                   |
| Polio3 immunization               | -272.1                 | 106.8 | 544.2   | -278.4                    | 123.6 | 556.9   | 12.7                | No                    |
| Measles immunization              | -86.2                  | 27.9  | 172.3   | -84.2                     | 28.2  | 168.3   | -4.0                | Yes                   |
| Full immunization                 | -212.9                 | 82.4  | 425.8   | -209.4                    | 89.5  | 418.8   | -7.0                | Yes                   |
| Improved Water                    | -2924.0                | 533.0 | 5848.0  | -2929.3                   | 519.7 | 5858.6  | 10.6                | No                    |
| Adequate sanitation               | -7045.6                | 807.8 | 14091.2 | -7054.4                   | 878.3 | 14108.9 | 17.7                | No                    |
| Institutional delivery            | -51.8                  | 15.9  | 103.6   | -50.0                     | 16.0  | 100.0   | -3.6                | Yes                   |
| Skilled birth attendance          | -197.9                 | 74.6  | 395.9   | -201.6                    | 77.4  | 403.2   | 7.3                 | No                    |
| Care seeking for pneumonia        | -52.0                  | 14.1  | 104.0   | -55.6                     | 18.2  | 111.2   | 7.2                 | No                    |
| ARI treatment                     | -21.2                  | 4.4   | 42.4    | -21.8                     | 5.7   | 43.7    | 1.3                 | No                    |
| Oral rehydration therapy          | -61.2                  | 12.4  | 122.4   | -63.5                     | 14.9  | 126.9   | 4.5                 | No                    |
| Composite Prevention (meta)       | -53.1                  | 12.6  | 106.1   | -51.8                     | 13.5  | 103.6   | -2.6                | Yes                   |
| Composite Treatment (meta)        | -51.8                  | 12.1  | 103.7   | -53.8                     | 15.6  | 107.7   | 4.0                 | No                    |
| Composite Coverage (meta)         | -112.0                 | 39.5  | 224.0   | -111.2                    | 43.0  | 222.4   | -1.6                | Yes                   |
| Composite Prevention (ari)        | -50.9                  | 11.2  | 101.9   | -49.5                     | 12.1  | 98.9    | -2.9                | Yes                   |
| Composite Treatment (ari)         | -42.7                  | 8.5   | 85.4    | -44.1                     | 10.4  | 88.3    | 2.9                 | No                    |
| Composite coverage (ari)          | -99.2                  | 34.5  | 198.4   | -95.7                     | 33.9  | 191.5   | -6.9                | Yes                   |
| Composite Prevention (geo)        | -49.7                  | 10.3  | 99.3    | -46.6                     | 10.2  | 93.3    | -6.0                | Yes                   |
| Composite Treatment (geo)         | -41.1                  | 7.4   | 82.2    | -43.7                     | 10.3  | 87.5    | 5.3                 | No                    |
| Composite coverage (geo)          | -98.2                  | 33.7  | 196.5   | -99.2                     | 37.5  | 198.4   | 1.9                 | No                    |

Note: LOOIC=Leave one out Criteria Information; ELPD=Expected Log Predictive Density; P\_LOO=Effective number of parameters; meta=Meta-analysis random effects; ari=Arithmetic Means; geo=Geometric Means



**Table S5: Model comparison using leave-one-out cross-validation for regional levels**

| Model                             | Model with random slope |        |         | Model without random slope |        |         | Difference in LOOIC | Random slope used |
|-----------------------------------|-------------------------|--------|---------|----------------------------|--------|---------|---------------------|-------------------|
|                                   | ELPD                    | P_LOO  | LOOIC   | ELPD                       | P_LOO  | LOOIC   |                     |                   |
| At least one ANC visit            | -158.0                  | 39.5   | 316.0   | -169.9                     | 35.1   | 339.7   | -23.7               | Yes               |
| At least four ANC visit           | -91.3                   | 16.5   | 182.7   | -92.4                      | 14.0   | 184.9   | -2.2                | Yes               |
| Exclusive breastfeeding           | -121.2                  | 22.5   | 242.4   | -117.9                     | 16.4   | 235.7   | 6.7                 | No                |
| Early initiation of breastfeeding | -412.8                  | 132.2  | 825.6   | -404.4                     | 97.3   | 808.8   | 16.8                | No                |
| Family planning needs satisfied   | -108.3                  | 18.6   | 216.6   | -119.3                     | 13.3   | 238.5   | -21.9               | Yes               |
| BCG immunization                  | -125.9                  | 23.1   | 251.7   | -124.4                     | 20.7   | 248.8   | 2.9                 | No                |
| DPT3 immunization                 | -213.2                  | 51.7   | 426.3   | -207.2                     | 42.2   | 414.5   | 11.9                | No                |
| Polio3 immunization               | -361.2                  | 120.8  | 722.5   | -343.4                     | 90.3   | 686.8   | 35.7                | No                |
| Measles immunization              | -177.5                  | 38.8   | 355.0   | -172.1                     | 30.7   | 344.1   | 10.9                | No                |
| Full immunization                 | -282.5                  | 87.5   | 564.9   | -271.4                     | 65.6   | 542.8   | 22.1                | No                |
| Improved Water                    | -7206.5                 | 1434.4 | 14412.9 | -8515.9                    | 1433.8 | 17031.7 | -2618.8             | Yes               |
| Adequate sanitation               | -6640.8                 | 1527.0 | 13281.6 | -7261.3                    | 1356.9 | 14522.7 | -1241.0             | Yes               |
| Institutional delivery            | -134.1                  | 38.3   | 268.1   | -132.4                     | 27.8   | 264.9   | 3.3                 | No                |
| Skilled birth attendance          | -309.9                  | 98.5   | 619.7   | -296.8                     | 75.9   | 593.7   | 26.1                | No                |
| Care seeking for pneumonia        | -135.7                  | 38.6   | 271.4   | -134.1                     | 22.4   | 268.1   | 3.3                 | No                |
| ARI treatment                     | -63.8                   | 13.9   | 127.5   | -64.5                      | 9.1    | 129.0   | -1.4                | Yes               |
| Oral rehydration therapy          | -131.1                  | 17.2   | 262.2   | -130.5                     | 15.0   | 260.9   | 1.2                 | No                |
| Composite Prevention (meta)       | -375.2                  | 123.6  | 750.3   | -362.5                     | 88.8   | 725.0   | 25.3                | No                |
| Composite Treatment (meta)        | -135.2                  | 19.4   | 270.4   | -133.1                     | 16.4   | 266.1   | 4.3                 | No                |
| Composite Coverage (meta)         | -414.5                  | 137.6  | 829.1   | -380.8                     | 82.1   | 761.5   | 67.5                | No                |
| Composite Prevention (ari)        | -331.4                  | 100.7  | 662.8   | -325.7                     | 77.1   | 651.5   | 11.3                | No                |
| Composite Treatment (ari)         | -125.2                  | 14.9   | 250.5   | -124.5                     | 12.6   | 248.9   | 1.6                 | No                |
| Composite Coverage (ari)          | -350.2                  | 107.3  | 700.4   | -325.4                     | 65.3   | 650.8   | 49.6                | No                |
| Composite Prevention (geo)        | -635.6                  | 233.5  | 1271.2  | -708.2                     | 219.8  | 1416.4  | -145.1              | Yes               |
| Composite Treatment (geo)         | -131.9                  | 18.9   | 263.7   | -137.8                     | 16.5   | 275.6   | -11.9               | Yes               |
| Composite Coverage (geo)          | -438.0                  | 144.7  | 876.0   | -439.2                     | 105.4  | 878.4   | -2.4                | Yes               |

Note: LOOIC=Leave one out Criteria Information; ELPD=Expected Log Predictive Density; P\_LOO=Effective number of parameters; meta=Meta-analysis random effects; ari=Arithmetic Means; geo=Geometric Means

**Table S6: Sensitivity analysis of composite methods in observed data by wealth quintiles, 2000–2014**

| Indicators                  | Wealth Quintiles | Estimated coverage in percent (95% CI) |                     |                     |                     |                     |
|-----------------------------|------------------|----------------------------------------|---------------------|---------------------|---------------------|---------------------|
|                             |                  | Year 2000                              | Year 2002           | Year 2006           | Year 2011           | Year 2014           |
| Composite Prevention (meta) | Poorest          | 33.3 (25.0 to 42.8)                    | 55.6 (43.3 to 67.2) | 41.7 (31.7 to 52.3) | 46.7 (36.7 to 56.9) | 58.1 (48.5 to 67.1) |
|                             | Poorer           | 50.8 (38.6 to 62.9)                    | 66.7 (54.7 to 76.8) | 62.5 (60.1 to 64.8) | 66.0 (52.6 to 77.3) | 77.9 (67.5 to 85.7) |
|                             | Middle           | 61.9 (59.5 to 64.3)                    | 75.7 (73.2 to 78.0) | 70.7 (68.5 to 72.9) | 67.2 (55.3 to 77.2) | 83.9 (74.8 to 90.2) |
|                             | Richer           | 68.1 (65.6 to 70.4)                    | 77.3 (74.9 to 79.5) | 75.5 (73.4 to 77.5) | 75.8 (63.8 to 84.8) | 86.8 (77.4 to 92.7) |
|                             | Richest          | 86.6 (84.8 to 88.3)                    | 88.3 (77.8 to 94.2) | 83.8 (82.0 to 85.5) | 79.7 (69.2 to 87.3) | 90.0 (80.8 to 95.1) |
| Composite Treatment (meta)  | Poorest          | 50.4 (41.5 to 59.3)                    | 56.6 (43.3 to 69.0) | 52.0 (44.1 to 59.8) | 56.1 (48.4 to 63.5) | 61.5 (54.4 to 68.1) |
|                             | Poorer           | 60.3 (48.4 to 71.1)                    | 73.2 (66.1 to 79.3) | 64.9 (54.8 to 73.8) | 76.6 (67.8 to 83.6) | 86.9 (79.8 to 91.8) |
|                             | Middle           | 58.5 (46.3 to 69.6)                    | 82.6 (75.2 to 88.1) | 72.8 (63.5 to 80.5) | 83.3 (75.4 to 89.1) | 86.4 (79.3 to 91.3) |
|                             | Richer           | 69.0 (56.2 to 79.4)                    | 91.4 (84.9 to 95.3) | 77.2 (68.1 to 84.3) | 81.4 (73.8 to 87.2) | 92.1 (86.4 to 95.5) |
|                             | Richest          | 81.0 (66.7 to 90.0)                    | 95.8 (91.2 to 98.1) | 86.2 (77.0 to 92.1) | 81.8 (74.4 to 87.3) | 93.0 (87.2 to 96.3) |
| Composite Coverage (meta)   | Poorest          | 37.1 (28.5 to 46.7)                    | 56.6 (43.3 to 69.0) | 45.6 (42.9 to 48.4) | 49.8 (47.2 to 52.4) | 59.1 (56.4 to 61.7) |
|                             | Poorer           | 54.1 (41.7 to 66.0)                    | 69.1 (66.1 to 71.9) | 62.9 (60.0 to 65.7) | 69.2 (66.5 to 71.8) | 80.9 (78.4 to 83.2) |
|                             | Middle           | 61.2 (58.4 to 63.9)                    | 77.5 (74.7 to 80.0) | 71.4 (68.7 to 74.0) | 72.7 (70.1 to 75.1) | 82.7 (82.9 to 87.1) |
|                             | Richer           | 68.5 (65.7 to 71.1)                    | 80.7 (78.2 to 83.1) | 76.5 (74.0 to 78.9) | 77.1 (74.8 to 79.2) | 88.5 (86.6 to 90.2) |
|                             | Richest          | 86.1 (84.0 to 88.1)                    | 89.6 (87.6 to 91.2) | 84.7 (82.5 to 86.7) | 80.8 (78.7 to 82.7) | 90.6 (88.8 to 92.1) |
| Composite Prevention (ari)  | Poorest          | 35.2 (26.8 to 44.7)                    | 55.6 (43.3 to 67.2) | 42.9 (32.8 to 53.5) | 46.7 (36.7 to 56.9) | 57.1 (47.6 to 66.2) |
|                             | Poorer           | 50.8 (38.6 to 62.9)                    | 65.2 (53.1 to 75.5) | 61.5 (59.1 to 63.8) | 62.3 (48.8 to 74.1) | 75.3 (64.6 to 83.6) |
|                             | Middle           | 60.7 (58.2 to 63.0)                    | 72.7 (70.2 to 75.1) | 68.0 (65.7 to 70.2) | 64.2 (52.2 to 74.6) | 80.5 (70.9 to 87.4) |
|                             | Richer           | 66.3 (63.9 to 68.7)                    | 73.7 (71.3 to 76.1) | 71.9 (69.7 to 74.0) | 69.4 (57.0 to 79.4) | 81.6 (71.4 to 88.7) |
|                             | Richest          | 80.1 (78.0 to 82.1)                    | 81.7 (70.1 to 89.4) | 79.4 (77.4 to 81.2) | 74.3 (63.3 to 82.9) | 82.9 (72.4 to 89.9) |
| Composite Treatment (ari)   | Poorest          | 50.4 (41.5 to 59.3)                    | 54.7 (41.5 to 67.3) | 52.7 (44.7 to 60.5) | 56.1 (48.4 to 63.5) | 61.5 (54.4 to 68.1) |
|                             | Poorer           | 58.8 (47.0 to 69.7)                    | 69.6 (62.3 to 76.1) | 62.8 (52.7 to 71.9) | 72.0 (62.8 to 79.6) | 82.0 (74.2 to 87.8) |
|                             | Middle           | 58.5 (46.3 to 69.6)                    | 78.0 (70.2 to 84.2) | 71.8 (62.5 to 79.6) | 77.2 (68.7 to 83.9) | 80.0 (72.1 to 86.1) |
|                             | Richer           | 67.2 (54.4 to 77.9)                    | 84.5 (76.8 to 90.0) | 74.3 (65.0 to 81.8) | 75.2 (67.1 to 81.8) | 85.6 (78.8 to 90.5) |
|                             | Richest          | 76.2 (61.5 to 86.5)                    | 86.8 (80.3 to 91.4) | 81.2 (71.3 to 88.3) | 73.7 (65.8 to 80.4) | 86.7 (79.8 to 91.5) |
| Composite Coverage (ari)    | Poorest          | 39.0 (30.3 to 48.6)                    | 56.6 (43.3 to 69.0) | 46.0 (43.3 to 48.7) | 49.8 (47.2 to 52.4) | 58.8 (56.1 to 61.4) |
|                             | Poorer           | 54.1 (41.7 to 66.0)                    | 66.8 (63.8 to 69.7) | 62.0 (59.1 to 64.8) | 65.9 (63.1 to 68.5) | 77.2 (74.6 to 79.7) |
|                             | Middle           | 60.1 (57.3 to 62.8)                    | 74.2 (71.3 to 76.8) | 69.2 (66.4 to 71.8) | 67.8 (65.1 to 70.4) | 80.0 (77.6 to 82.3) |
|                             | Richer           | 66.6 (63.8 to 69.3)                    | 76.7 (73.9 to 79.2) | 72.6 (69.9 to 75.1) | 71.5 (69.0 to 73.8) | 82.6 (80.3 to 84.6) |
|                             | Richest          | 79.4 (76.9 to 81.7)                    | 83.3 (81.0 to 85.4) | 79.9 (77.5 to 82.2) | 74.0 (71.7 to 76.1) | 84.2 (82.1 to 86.1) |
| Composite Prevention (geo)  | Poorest          | 26.7 (19.1 to 35.8)                    | 46.0 (34.3 to 58.2) | 39.3 (29.5 to 50.0) | 42.2 (32.5 to 52.5) | 54.3 (44.8 to 63.5) |
|                             | Poorer           | 44.3 (32.5 to 56.7)                    | 56.1 (44.1 to 67.4) | 51.8 (49.4 to 54.2) | 56.6 (43.3 to 69.0) | 70.1 (59.2 to 79.2) |
|                             | Middle           | 52.8 (50.4 to 55.3)                    | 65.1 (62.4 to 67.7) | 62.3 (59.9 to 64.6) | 56.7 (44.8 to 67.9) | 74.7 (64.7 to 82.7) |
|                             | Richer           | 62.7 (60.2 to 65.1)                    | 66.0 (63.4 to 68.5) | 64.7 (62.3 to 66.9) | 58.1 (45.7 to 69.5) | 72.4 (61.4 to 81.2) |
|                             | Richest          | 68.3 (65.8 to 70.6)                    | 70.0 (57.5 to 80.1) | 64.3 (62.0 to 66.5) | 64.9 (53.5 to 74.8) | 75.7 (64.5 to 84.2) |
| Composite Treatment (geo)   | Poorest          | 48.7 (39.8 to 57.7)                    | 52.8 (39.7 to 65.6) | 50.7 (42.7 to 58.6) | 51.8 (44.2 to 59.3) | 56.8 (49.7 to 63.6) |
|                             | Poorer           | 58.8 (47.0 to 69.7)                    | 63.1 (55.6 to 70.0) | 61.7 (51.6 to 70.9) | 66.4 (57.0 to 74.6) | 73.8 (65.3 to 80.8) |
|                             | Middle           | 58.5 (46.3 to 69.6)                    | 75.8 (67.8 to 82.3) | 70.9 (61.5 to 78.8) | 73.7 (64.9 to 80.9) | 74.4 (66.1 to 81.2) |
|                             | Richer           | 65.5 (52.7 to 76.4)                    | 82.8 (74.9 to 88.6) | 71.3 (61.8 to 79.2) | 67.4 (59.0 to 74.9) | 82.0 (74.8 to 87.5) |
|                             | Richest          | 76.2 (61.5 to 86.5)                    | 84.7 (78.0 to 89.7) | 80.0 (70.0 to 87.3) | 67.9 (59.7 to 75.1) | 83.6 (76.2 to 89.0) |
| Composite Coverage (geo)    | Poorest          | 31.4 (23.3 to 40.8)                    | 47.2 (34.4 to 60.3) | 42.7 (40.0 to 45.4) | 44.7 (42.1 to 47.3) | 55.2 (52.6 to 57.9) |
|                             | Poorer           | 47.5 (35.5 to 59.8)                    | 57.9 (54.8 to 61.0) | 55.3 (52.3 to 58.2) | 59.9 (57.1 to 62.7) | 71.0 (68.2 to 73.7) |
|                             | Middle           | 54.1 (51.3 to 56.9)                    | 67.7 (64.7 to 70.6) | 65.2 (62.3 to 67.9) | 61.3 (58.5 to 64.0) | 74.4 (71.8 to 76.9) |
|                             | Richer           | 63.5 (60.6 to 66.2)                    | 70.1 (67.1 to 72.9) | 66.9 (64.1 to 69.6) | 61.3 (58.6 to 63.8) | 75.1 (72.6 to 77.4) |
|                             | Richest          | 70.2 (67.4 to 72.8)                    | 73.7 (71.0 to 76.2) | 69.4 (66.7 to 72.1) | 65.6 (63.2 to 68.0) | 78.3 (75.9 to 80.5) |

Note: meta=Meta-analysis random effects; ari=Arithmetic Means; geo=Geometric Means

**Table S7: Sensitivity analysis of composite methods in observed data by living areas, 2000–2014**

| Indicators                  | Living Area | Estimated coverage in percent (95% CI) |                     |                     |                     |                     |
|-----------------------------|-------------|----------------------------------------|---------------------|---------------------|---------------------|---------------------|
|                             |             | Year 2000                              | Year 2002           | Year 2006           | Year 2011           | Year 2014           |
| Composite Prevention (meta) | Rural       | 48.8 (42.6 to 55.0)                    | 67.9 (61.5 to 73.6) | 59.2 (52.4 to 65.7) | 59.6 (53.0 to 65.9) | 74.0 (68.4 to 79.0) |
|                             | Urban       | 79.0 (77.1 to 80.8)                    | 83.3 (72.0 to 90.7) | 83.3 (71.3 to 91.0) | 75.0 (66.8 to 81.7) | 83.0 (76.3 to 88.1) |
| Composite Treatment (meta)  | Rural       | 56.7 (50.9 to 62.4)                    | 71.4 (63.0 to 78.6) | 64.4 (56.8 to 71.4) | 70.0 (59.9 to 78.5) | 74.1 (63.9 to 82.2) |
|                             | Urban       | 74.1 (61.6 to 83.7)                    | 92.5 (87.0 to 95.7) | 78.9 (70.3 to 85.5) | 77.9 (72.4 to 82.6) | 88.8 (84.3 to 92.1) |
| Composite Coverage (meta)   | Rural       | 50.8 (44.6 to 57.0)                    | 69.0 (60.5 to 76.5) | 61.3 (53.7 to 68.5) | 63.3 (53.0 to 72.6) | 74.1 (63.9 to 82.2) |
|                             | Urban       | 78.3 (76.0 to 80.3)                    | 85.0 (82.9 to 87.0) | 82.6 (80.5 to 84.6) | 75.9 (74.3 to 77.5) | 84.7 (83.3 to 86.1) |
| Composite Prevention (ari)  | Rural       | 48.8 (42.6 to 55.0)                    | 66.5 (60.1 to 72.4) | 58.7 (51.9 to 65.2) | 58.3 (51.6 to 64.6) | 72.5 (66.8 to 77.6) |
|                             | Urban       | 75.7 (73.7 to 77.6)                    | 78.3 (66.4 to 86.9) | 77.8 (65.1 to 86.8) | 71.1 (62.7 to 78.2) | 79.1 (72.0 to 84.8) |
| Composite Treatment (ari)   | Rural       | 57.1 (51.3 to 62.7)                    | 69.8 (61.3 to 77.2) | 64.4 (56.8 to 71.4) | 68.9 (58.7 to 77.5) | 72.9 (62.7 to 81.2) |
|                             | Urban       | 72.4 (59.8 to 82.2)                    | 82.2 (75.2 to 87.5) | 74.3 (65.4 to 81.6) | 72.3 (66.4 to 77.5) | 84.1 (79.2 to 88.1) |
| Composite Coverage (ari)    | Rural       | 50.8 (44.6 to 57.0)                    | 67.5 (58.9 to 75.0) | 60.7 (53.1 to 67.9) | 61.1 (50.8 to 70.5) | 72.9 (62.7 to 81.2) |
|                             | Urban       | 74.7 (72.3 to 76.9)                    | 79.7 (77.2 to 81.9) | 76.5 (74.1 to 78.7) | 71.3 (69.6 to 72.9) | 80.5 (78.9 to 82.0) |
| Composite Prevention (geo)  | Rural       | 44.3 (38.2 to 50.6)                    | 58.0 (51.5 to 64.3) | 54.4 (47.5 to 61.0) | 52.8 (46.1 to 59.3) | 68.7 (62.9 to 74.0) |
|                             | Urban       | 67.3 (65.1 to 69.4)                    | 70.0 (57.5 to 80.1) | 64.8 (51.5 to 76.2) | 62.5 (53.9 to 70.4) | 72.5 (65.0 to 79.0) |
| Composite Treatment (geo)   | Rural       | 56.7 (50.9 to 62.4)                    | 66.7 (58.1 to 74.3) | 63.8 (56.2 to 70.8) | 63.3 (53.0 to 72.6) | 67.1 (56.5 to 76.1) |
|                             | Urban       | 69.0 (56.2 to 79.4)                    | 78.1 (70.7 to 84.0) | 72.5 (63.4 to 80.0) | 66.7 (60.6 to 72.2) | 79.8 (74.5 to 84.3) |
| Composite Coverage (geo)    | Rural       | 47.2 (41.0 to 53.4)                    | 60.3 (51.6 to 68.4) | 57.7 (50.0 to 65.0) | 55.6 (45.3 to 65.4) | 68.2 (57.7 to 77.2) |
|                             | Urban       | 67.9 (65.4 to 70.3)                    | 71.6 (68.9 to 74.1) | 67.7 (65.2 to 70.2) | 63.8 (62.0 to 65.6) | 74.6 (72.8 to 76.3) |

Note: meta=Meta-analysis random effects; ari=Arithmetic Means; geo=Geometric Means

**Table S8: Sensitivity analysis of composite methods in observed data by regional levels, 2000–2014**

| Indicators                  | Regions             | Estimated coverage in percent (95% CI) |                     |                     |                     |                     |
|-----------------------------|---------------------|----------------------------------------|---------------------|---------------------|---------------------|---------------------|
|                             |                     | Year 2000                              | Year 2002           | Year 2006           | Year 2011           | Year 2014           |
| Composite Prevention (meta) | Northwest           | 35.7 (33.0 to 38.5)                    | 54.3 (48.6 to 60.0) | 40.4 (28.2 to 53.9) | 51.9 (48.0 to 55.9) | 59.4 (55.2 to 63.5) |
|                             | Northeast           | 47.5 (43.6 to 51.4)                    | 73.1 (69.7 to 76.3) | 62.6 (59.0 to 66.1) | 62.4 (59.5 to 65.2) | 78.7 (66.9 to 87.1) |
|                             | Red River Delta     | 73.8 (71.2 to 76.2)                    | 86.2 (75.1 to 92.8) | 73.0 (70.5 to 75.4) | 72.7 (59.8 to 82.7) | 88.5 (78.2 to 94.3) |
|                             | North Central       | 59.0 (56.0 to 62.0)                    | 70.2 (67.2 to 73.1) | 66.7 (63.8 to 69.6) | 65.9 (62.6 to 69.2) | 84.1 (81.0 to 86.7) |
|                             | South Central Coast | 62.9 (60.2 to 65.5)                    | 70.6 (67.2 to 73.9) | 72.4 (69.9 to 74.8) | 72.2 (68.9 to 75.3) | 82.6 (79.5 to 85.4) |
|                             | Central Highlands   | 45.4 (42.6 to 48.3)                    | 74.4 (68.9 to 79.3) | 62.8 (60.1 to 65.4) | 59.7 (47.3 to 71.0) | 69.5 (58.9 to 78.4) |
|                             | Southeast           | 67.4 (64.0 to 70.6)                    | 78.7 (75.7 to 81.3) | 80.4 (77.6 to 83.0) | 79.5 (77.4 to 81.5) | 81.5 (70.4 to 89.1) |
| Composite Treatment (meta)  | Mekong River Delta  | 54.6 (51.7 to 57.4)                    | 61.8 (49.9 to 72.4) | 63.5 (60.6 to 66.2) | 62.8 (60.4 to 65.2) | 77.4 (64.5 to 86.5) |
|                             | Northwest           | 50.9 (38.3 to 63.4)                    | 30.2 (18.6 to 45.1) | 58.3 (47.7 to 68.3) | 51.7 (39.2 to 64.1) | 50.9 (38.1 to 63.6) |
|                             | Northeast           | 42.1 (27.9 to 57.8)                    | 68.8 (57.9 to 77.8) | 64.9 (48.8 to 78.2) | 75.9 (65.5 to 84.0) | 77.4 (67.4 to 85.0) |
|                             | Red River Delta     | 71.7 (57.5 to 82.7)                    | 89.8 (83.8 to 93.7) | 80.6 (70.0 to 88.0) | 81.2 (72.3 to 87.8) | 90.8 (83.5 to 95.1) |
|                             | North Central       | 62.3 (48.8 to 74.1)                    | 72.6 (62.9 to 80.6) | 61.0 (48.3 to 72.4) | 71.2 (58.6 to 81.2) | 87.3 (76.0 to 93.7) |
|                             | South Central Coast | 62.5 (49.4 to 74.0)                    | 75.5 (66.6 to 82.5) | 75.8 (63.8 to 84.8) | 78.6 (64.1 to 88.3) | 78.8 (66.0 to 87.8) |
|                             | Central Highlands   | 55.3 (44.1 to 65.9)                    | 72.5 (57.2 to 83.9) | 60.4 (50.6 to 69.4) | 67.9 (59.5 to 75.3) | 75.8 (68.5 to 81.9) |
| Composite Coverage (meta)   | Southeast           | 65.5 (47.3 to 80.1)                    | 87.0 (77.7 to 92.8) | 81.2 (68.1 to 89.8) | 87.0 (79.0 to 92.2) | 90.9 (84.1 to 95.0) |
|                             | Mekong River Delta  | 68.1 (53.8 to 79.6)                    | 84.2 (77.7 to 89.0) | 70.8 (58.8 to 80.4) | 80.5 (70.9 to 87.4) | 84.7 (76.3 to 90.5) |
|                             | Northwest           | 39.2 (36.0 to 42.4)                    | 48.0 (41.5 to 54.5) | 47.3 (43.8 to 50.9) | 51.2 (46.6 to 55.9) | 55.2 (50.2 to 60.1) |
|                             | Northeast           | 46.5 (42.0 to 50.9)                    | 71.8 (67.8 to 75.5) | 63.3 (58.8 to 67.6) | 66.2 (62.8 to 69.5) | 78.5 (75.3 to 81.4) |
|                             | Red River Delta     | 73.5 (70.5 to 76.3)                    | 87.2 (85.1 to 89.1) | 75.9 (72.8 to 78.7) | 75.8 (73.0 to 78.4) | 89.1 (86.9 to 91.0) |
|                             | North Central       | 59.9 (56.5 to 63.3)                    | 70.5 (67.0 to 73.7) | 65.0 (61.3 to 68.5) | 68.2 (64.2 to 71.9) | 85.5 (81.9 to 88.4) |
|                             | South Central Coast | 62.7 (59.6 to 65.7)                    | 72.0 (68.0 to 75.6) | 73.6 (70.5 to 76.4) | 74.9 (71.0 to 78.4) | 82.8 (79.1 to 85.9) |
| Composite Prevention (ari)  | Central Highlands   | 48.2 (45.0 to 51.5)                    | 73.7 (67.2 to 79.2) | 62.2 (58.9 to 65.4) | 62.5 (59.7 to 65.2) | 71.7 (68.9 to 74.3) |
|                             | Southeast           | 66.7 (62.9 to 70.4)                    | 80.9 (77.7 to 83.8) | 81.7 (78.3 to 84.7) | 81.9 (79.5 to 84.1) | 84.8 (82.4 to 86.9) |
|                             | Mekong River Delta  | 57.8 (54.5 to 61.1)                    | 67.8 (65.0 to 70.5) | 66.4 (62.9 to 69.7) | 68.4 (65.6 to 71.1) | 80.1 (77.4 to 82.5) |
|                             | Northwest           | 36.7 (34.0 to 39.5)                    | 54.3 (48.6 to 60.0) | 40.4 (28.2 to 53.9) | 50.5 (46.6 to 54.4) | 58.3 (54.1 to 62.4) |
|                             | Northeast           | 47.5 (43.6 to 51.4)                    | 68.1 (64.5 to 71.5) | 60.5 (56.9 to 64.1) | 59.7 (56.7 to 62.5) | 75.4 (63.3 to 84.5) |
|                             | Red River Delta     | 71.5 (68.8 to 74.0)                    | 81.0 (69.1 to 89.1) | 69.9 (67.3 to 72.4) | 67.3 (54.1 to 78.2) | 83.6 (72.4 to 90.8) |
|                             | North Central       | 57.5 (54.5 to 60.5)                    | 66.9 (63.8 to 69.9) | 63.1 (60.1 to 66.0) | 61.5 (58.1 to 64.8) | 80.0 (76.7 to 82.9) |
| Composite Treatment (ari)   | South Central Coast | 62.5 (59.7 to 65.1)                    | 69.4 (65.8 to 72.7) | 70.4 (67.8 to 72.8) | 68.5 (65.1 to 71.8) | 78.8 (75.5 to 81.8) |
|                             | Central Highlands   | 45.8 (43.0 to 48.7)                    | 72.6 (66.9 to 77.6) | 61.5 (58.8 to 64.2) | 58.1 (45.7 to 69.5) | 68.3 (57.6 to 77.4) |
|                             | Southeast           | 66.2 (62.9 to 69.5)                    | 75.5 (72.4 to 78.3) | 75.9 (72.9 to 78.7) | 74.9 (72.6 to 77.0) | 78.5 (67.0 to 86.7) |
|                             | Mekong River Delta  | 54.3 (51.4 to 57.2)                    | 61.8 (49.9 to 72.4) | 62.8 (59.9 to 65.6) | 60.6 (58.2 to 63.0) | 75.5 (62.4 to 85.1) |
|                             | Northwest           | 52.6 (39.9 to 65.0)                    | 34.9 (22.4 to 49.8) | 58.3 (47.7 to 68.3) | 56.9 (44.1 to 68.8) | 41.8 (29.7 to 55.0) |
|                             | Northeast           | 44.7 (30.1 to 60.3)                    | 65.0 (54.1 to 74.5) | 67.6 (51.5 to 80.4) | 74.7 (64.1 to 83.0) | 73.8 (63.5 to 82.0) |
|                             | Red River Delta     | 69.6 (55.2 to 80.9)                    | 81.0 (73.8 to 86.5) | 76.4 (65.4 to 84.7) | 74.0 (64.4 to 81.7) | 84.7 (76.3 to 90.5) |
| Composite Coverage (ari)    | North Central       | 62.3 (48.8 to 74.1)                    | 67.4 (57.4 to 76.0) | 61.0 (48.3 to 72.4) | 66.1 (53.4 to 76.9) | 80.0 (67.6 to 88.4) |
|                             | South Central Coast | 60.7 (47.6 to 72.4)                    | 73.6 (64.7 to 81.0) | 74.2 (62.1 to 83.4) | 73.8 (58.9 to 84.7) | 73.1 (59.7 to 83.2) |
|                             | Central Highlands   | 56.6 (45.4 to 67.1)                    | 67.5 (52.0 to 79.9) | 60.4 (50.6 to 69.4) | 65.6 (57.2 to 73.2) | 74.5 (67.1 to 80.8) |
|                             | Southeast           | 62.1 (44.0 to 77.3)                    | 74.0 (63.3 to 82.5) | 75.0 (61.2 to 85.1) | 80.0 (71.1 to 86.7) | 83.6 (75.6 to 89.4) |
|                             | Mekong River Delta  | 66.0 (51.7 to 77.8)                    | 79.1 (72.1 to 84.7) | 66.2 (54.0 to 76.5) | 71.3 (61.0 to 79.7) | 77.6 (68.3 to 84.7) |
|                             | Northwest           | 40.5 (37.3 to 43.8)                    | 48.9 (42.4 to 55.4) | 47.4 (43.9 to 51.0) | 52.1 (47.5 to 56.8) | 52.9 (47.9 to 57.8) |
|                             | Northeast           | 46.5 (42.0 to 50.9)                    | 67.4 (63.2 to 71.3) | 62.7 (58.2 to 66.9) | 64.3 (60.9 to 67.6) | 74.6 (71.2 to 77.7) |
| Composite Prevention (geo)  | Red River Delta     | 70.8 (67.7 to 73.7)                    | 80.8 (78.3 to 83.0) | 72.2 (69.1 to 75.2) | 69.4 (66.4 to 72.3) | 84.2 (81.6 to 86.4) |
|                             | North Central       | 58.5 (55.0 to 61.9)                    | 66.9 (63.4 to 70.3) | 62.2 (58.4 to 65.7) | 63.0 (59.0 to 66.9) | 80.2 (76.3 to 83.6) |
|                             | South Central Coast | 62.3 (59.1 to 65.3)                    | 70.3 (66.3 to 74.0) | 71.6 (68.5 to 74.6) | 70.3 (66.2 to 74.0) | 77.2 (73.1 to 80.7) |
|                             | Central Highlands   | 48.7 (45.4 to 51.9)                    | 71.2 (64.7 to 77.0) | 61.3 (58.0 to 64.5) | 60.8 (58.0 to 63.5) | 70.0 (67.3 to 72.7) |
|                             | Southeast           | 65.1 (61.2 to 68.8)                    | 75.1 (71.6 to 78.4) | 75.4 (71.6 to 78.8) | 76.4 (73.8 to 78.8) | 79.9 (77.4 to 82.3) |
|                             | Mekong River Delta  | 57.4 (54.1 to 60.6)                    | 66.2 (63.4 to 68.9) | 64.2 (60.7 to 67.6) | 64.0 (61.1 to 66.8) | 75.6 (72.7 to 78.2) |
|                             | Northwest           | 32.1 (29.5 to 34.9)                    | 52.6 (46.8 to 58.3) | 38.5 (26.5 to 52.0) | 47.2 (43.3 to 51.2) | 55.7 (51.4 to 59.8) |
| Composite Treatment (geo)   | Northeast           | 41.9 (38.1 to 45.8)                    | 59.5 (55.8 to 63.2) | 58.7 (55.0 to 62.2) | 54.2 (51.2 to 57.1) | 72.1 (59.8 to 81.8) |
|                             | Red River Delta     | 68.1 (65.4 to 70.7)                    | 72.4 (59.8 to 82.2) | 64.8 (62.1 to 67.4) | 58.2 (45.0 to 70.3) | 78.7 (66.9 to 87.1) |
|                             | North Central       | 54.1 (51.0 to 57.1)                    | 61.6 (58.4 to 64.6) | 54.6 (51.6 to 57.7) | 54.0 (50.5 to 57.5) | 77.2 (73.7 to 80.3) |
|                             | South Central Coast | 46.5 (43.8 to 49.3)                    | 73.2 (69.8 to 76.4) | 64.2 (61.5 to 66.8) | 75.7 (72.5 to 78.7) | 71.7 (68.2 to 75.1) |
|                             | Central Highlands   | 35.9 (33.2 to 38.7)                    | 66.5 (60.7 to 71.9) | 52.7 (49.9 to 55.4) | 51.6 (39.4 to 63.6) | 63.4 (52.6 to 73.0) |
|                             | Southeast           | 75.6 (72.5 to 78.5)                    | 64.3 (61.0 to 67.6) | 86.3 (83.8 to 88.5) | 63.9 (61.4 to 66.3) | 66.2 (54.0 to 76.5) |
|                             | Mekong River Delta  | 47.7 (44.8 to 50.6)                    | 50.0 (38.4 to 61.6) | 70.7 (67.9 to 73.3) | 47.0 (44.6 to 49.5) | 67.9 (54.5 to 78.9) |
| Composite Coverage (geo)    | Northwest           | 47.4 (35.0 to 60.1)                    | 23.3 (13.2 to 37.7) | 57.1 (46.5 to 67.2) | 48.3 (35.9 to 60.8) | 38.2 (26.5 to 51.4) |
|                             | Northeast           | 42.1 (27.9 to 57.8)                    | 60.0 (49.0 to 70.0) | 64.9 (48.8 to 78.2) | 72.2 (61.4 to 80.8) | 70.2 (59.8 to 79.0) |
|                             | Red River Delta     | 67.4 (53.0 to 79.1)                    | 76.2 (68.7 to 82.4) | 75.0 (63.9 to 83.6) | 68.8 (58.9 to 77.1) | 79.6 (70.6 to 86.4) |
|                             | North Central       | 60.4 (46.9 to 72.4)                    | 58.9 (48.9 to 68.3) | 59.3 (46.6 to 70.9) | 61.0 (48.3 to 72.4) | 70.9 (57.9 to 81.2) |
|                             | South Central Coast | 58.9 (45.9 to 70.8)                    | 70.9 (61.8 to 78.6) | 72.6 (60.4 to 82.1) | 52.4 (37.7 to 66.6) | 63.5 (49.9 to 75.2) |
|                             | Central Highlands   | 56.6 (45.4 to 67.1)                    | 67.5 (52.0 to 79.9) | 60.4 (50.6 to 69.4) | 62.6 (54.1 to 70.4) | 69.9 (62.3 to 76.6) |
|                             | Southeast           | 55.2 (37.5 to 71.6)                    | 57.1 (46.0 to 67.6) | 64.6 (50.4 to 76.6) | 74.0 (64.6 to 81.6) | 75.5 (66.6 to 82.5) |
| Composite Treatment (meta)  | Mekong River Delta  | 66.0 (51.7 to 77.8)                    | 76.6 (69.4 to 82.5) | 60.0 (47.9 to 71.0) | 60.9 (50.4 to 71.6) | 62.2 (52.4 to 71.2) |
|                             | Northwest           | 35.4 (32.3 to 38.6)                    | 42.6 (36.3 to 49.2) | 44.3 (40.8 to 47.8) | 47.4 (42.8 to 52.1) | 49.2 (44.2 to 54.2) |
|                             | Northeast           | 42.1 (37.7 to 46.5)                    | 59.7 (55.4 to 63.8) | 61.2 (56.7 to 65.5) | 59.1 (55.7 to 62.6) | 71.3 (67.8 to 74.5) |

|                                |                     |                     |                     |                     |                     |                     |
|--------------------------------|---------------------|---------------------|---------------------|---------------------|---------------------|---------------------|
| Composite<br>Coverage<br>(geo) | Red River Delta     | 68.0 (64.8 to 71.0) | 73.4 (70.8 to 76.0) | 68.0 (64.7 to 71.1) | 61.5 (58.3 to 64.5) | 79.1 (76.3 to 81.7) |
|                                | North Central       | 55.4 (51.9 to 58.9) | 60.9 (57.3 to 64.4) | 56.4 (52.6 to 60.1) | 55.9 (51.8 to 60.0) | 75.3 (71.2 to 79.1) |
|                                | South Central Coast | 49.4 (46.3 to 52.6) | 72.7 (68.8 to 76.3) | 67.3 (64.0 to 70.4) | 67.4 (63.2 to 71.3) | 69.2 (64.8 to 73.2) |
|                                | Central Highlands   | 40.3 (37.1 to 43.5) | 66.3 (59.6 to 72.5) | 55.2 (51.9 to 58.5) | 54.3 (51.5 to 57.1) | 65.7 (62.8 to 68.4) |
|                                | Southeast           | 69.4 (65.6 to 72.9) | 62.2 (58.3 to 65.9) | 78.1 (74.4 to 81.3) | 66.9 (64.0 to 69.7) | 69.1 (66.2 to 71.8) |
|                                | Mekong River Delta  | 51.6 (48.3 to 54.9) | 56.2 (53.3 to 59.1) | 66.9 (63.4 to 70.2) | 51.1 (48.1 to 54.0) | 65.4 (62.3 to 68.3) |

Note: meta=Meta-analysis random effects; ari=Arithmetic Means; geo=Geometric Means

**Table S9: Observed coverage of RMNCH service in Vietnam by wealth quintiles, 2000–2014**

| Indicators                        | Wealth Quintiles    | Estimated coverage in percent (95% CI) |                       |                     |                     |                       |
|-----------------------------------|---------------------|----------------------------------------|-----------------------|---------------------|---------------------|-----------------------|
|                                   |                     | Year 2000                              | Year 2002             | Year 2006           | Year 2011           | Year 2014             |
| At least one ANC visit            | Poorest             | 42.2 (35.4 to 49.4)                    | 66.8 (61.5 to 71.7)   | 64.4 (58.7 to 69.8) | 74.6 (69.6 to 79.0) | 79.3 (74.9 to 83.2)   |
|                                   | Poorer              | 73.8 (64.5 to 81.3)                    | 87.0 (82.6 to 90.4)   | 90.4 (85.2 to 94.0) | 96.9 (93.7 to 98.5) | 98.5 (96.1 to 99.4)   |
|                                   | Middle              | 78.8 (69.7 to 85.7)                    | 93.4 (89.5 to 96.0)   | 93.8 (89.5 to 96.4) | 99.2 (97.0 to 99.8) | 99.6 (97.9 to 99.9)   |
|                                   | Richer              | 89.0 (80.9 to 93.9)                    | 94.7 (90.8 to 97.0)   | 96.4 (92.8 to 98.3) | 98.9 (96.8 to 99.6) | 100.0 (98.8 to 100.0) |
|                                   | Richest             | 98.6 (92.3 to 99.7)                    | 98.9 (96.7 to 99.6)   | 98.8 (95.9 to 99.7) | 99.3 (97.6 to 99.8) | 99.7 (98.1 to 99.9)   |
| At least four ANC visit           | Poorest             | NA                                     | 14.2 (10.8 to 18.4)   | NA                  | 20.8 (16.7 to 25.5) | 31.4 (26.8 to 36.4)   |
|                                   | Poorer              | NA                                     | 18.8 (14.8 to 23.7)   | NA                  | 46.6 (40.2 to 53.2) | 65.1 (59.2 to 70.7)   |
|                                   | Middle              | NA                                     | 25.8 (20.5 to 31.8)   | NA                  | 55.8 (49.5 to 62.0) | 78.4 (73.0 to 82.9)   |
|                                   | Richer              | NA                                     | 33.5 (27.4 to 40.1)   | NA                  | 77.6 (72.3 to 82.2) | 87.9 (83.7 to 91.1)   |
|                                   | Richest             | NA                                     | 61.1 (55.0 to 66.8)   | NA                  | 88.9 (84.8 to 91.9) | 95.8 (92.8 to 97.6)   |
| Exclusive breastfeeding           | Poorest             | 21.9 (15.1 to 30.7)                    | 6.3 (2.5 to 15.2)     | 27.4 (19.0 to 37.7) | 27.8 (19.6 to 37.8) | 34.3 (25.9 to 43.8)   |
|                                   | Poorer              | 16.4 (9.2 to 27.6)                     | 10.6 (5.2 to 20.3)    | 7.1 (2.5 to 19.0)   | 15.1 (7.9 to 27.1)  | 18.2 (11.2 to 28.2)   |
|                                   | Middle              | 10.9 (4.7 to 23.0)                     | 17.0 (8.9 to 30.1)    | 17.0 (8.9 to 30.1)  | 16.4 (9.4 to 27.1)  | 19.5 (12.6 to 29.1)   |
|                                   | Richer              | 26.1 (15.6 to 40.3)                    | 14.6 (7.2 to 27.2)    | 14.6 (7.2 to 27.2)  | 6.5 (2.5 to 15.4)   | 10.5 (5.4 to 19.4)    |
|                                   | Richest             | 8.6 (3.0 to 22.4)                      | 6.7 (2.6 to 15.9)     | 5.1 (1.4 to 16.9)   | 9.5 (4.7 to 18.3)   | 15.7 (9.0 to 26.0)    |
| Early initiation of breastfeeding | Poorest             | NA                                     | 53.5 (48.1 to 58.9)   | 19.3 (12.4 to 28.8) | 67.9 (62.6 to 72.7) | 45.7 (40.7 to 50.9)   |
|                                   | Poorer              | NA                                     | 68.2 (62.6 to 73.2)   | 17.4 (12.5 to 23.7) | 57.8 (51.3 to 64.1) | 44.4 (38.5 to 50.5)   |
|                                   | Middle              | NA                                     | 65.5 (59.1 to 71.4)   | 22.8 (16.9 to 29.9) | 51.7 (45.4 to 57.9) | 44.8 (38.9 to 50.8)   |
|                                   | Richer              | NA                                     | 58.4 (51.6 to 64.8)   | 21.5 (15.9 to 28.4) | 47.8 (41.9 to 53.7) | 40.3 (35.0 to 45.9)   |
|                                   | Richest             | NA                                     | 54.6 (48.5 to 60.5)   | 25.3 (19.3 to 32.4) | 48.5 (43.0 to 54.1) | 32.4 (27.3 to 38.0)   |
| Family planning needs satisfied   | Poorest             | NA                                     | 79.3 (76.2 to 82.1)   | NA                  | 70.7 (68.1 to 73.2) | 66.4 (63.5 to 69.1)   |
|                                   | Poorer              | NA                                     | 76.2 (73.0 to 79.0)   | NA                  | 65.3 (62.4 to 68.1) | 63.1 (59.9 to 66.1)   |
|                                   | Middle              | NA                                     | 71.8 (68.8 to 74.7)   | NA                  | 65.2 (62.4 to 67.8) | 59.8 (56.7 to 62.8)   |
|                                   | Richer              | NA                                     | 70.4 (67.4 to 73.3)   | NA                  | 60.6 (58.0 to 63.2) | 58.5 (55.7 to 61.3)   |
|                                   | Richest             | NA                                     | 66.2 (63.1 to 69.2)   | NA                  | 63.3 (60.9 to 65.7) | 64.8 (62.0 to 67.4)   |
| BCG immunization                  | Poorest             | 77.1 (70.9 to 82.3)                    | 83.9 (76.0 to 89.6)   | 60.4 (52.6 to 67.6) | 83.4 (77.3 to 88.1) | 83.5 (77.3 to 88.3)   |
|                                   | Poorer              | 85.3 (77.8 to 90.6)                    | 95.2 (89.3 to 97.9)   | 88.1 (80.4 to 93.1) | 95.0 (89.4 to 97.7) | 97.8 (93.8 to 99.3)   |
|                                   | Middle              | 94.4 (87.5 to 97.6)                    | 95.0 (87.8 to 98.0)   | 90.7 (83.3 to 95.0) | 94.4 (89.3 to 97.1) | 98.5 (94.8 to 99.6)   |
|                                   | Richer              | 91.3 (82.3 to 96.0)                    | 97.5 (91.3 to 99.3)   | 94.4 (88.3 to 97.4) | 97.4 (93.5 to 99.0) | 99.4 (96.9 to 99.9)   |
|                                   | Richest             | 100.0 (94.4 to 100.0)                  | 100.0 (95.9 to 100.0) | 94.4 (87.6 to 97.6) | 97.2 (93.6 to 98.8) | 100.0 (97.6 to 100.0) |
| DPT3 immunization                 | Poorest             | 32.7 (26.6 to 39.4)                    | 57.1 (47.9 to 65.9)   | 39.0 (31.8 to 46.7) | 32.0 (25.7 to 39.2) | 56.8 (49.4 to 63.9)   |
|                                   | Poorer              | 50.9 (41.9 to 59.8)                    | 65.7 (56.2 to 74.1)   | 65.3 (55.7 to 73.9) | 53.8 (44.8 to 62.5) | 74.8 (67.0 to 81.3)   |
|                                   | Middle              | 57.3 (46.9 to 67.1)                    | 78.8 (68.6 to 86.3)   | 68.0 (58.2 to 76.5) | 45.8 (37.8 to 54.0) | 78.5 (70.9 to 84.6)   |
|                                   | Richer              | 63.8 (52.0 to 74.1)                    | 76.2 (65.9 to 84.2)   | 72.9 (63.8 to 80.4) | 56.5 (48.6 to 64.1) | 85.8 (79.9 to 90.2)   |
|                                   | Richest             | 80.0 (68.7 to 87.9)                    | 91.1 (83.4 to 95.4)   | 86.7 (78.1 to 92.2) | 68.2 (61.0 to 74.5) | 84.9 (78.5 to 89.6)   |
| Polio3 immunization               | Poorest             | 29.8 (23.9 to 36.3)                    | 59.8 (50.6 to 68.4)   | 38.4 (31.2 to 46.1) | 29.8 (23.6 to 36.9) | 62.5 (55.2 to 69.3)   |
|                                   | Poorer              | 48.3 (39.4 to 57.3)                    | 67.6 (58.2 to 75.8)   | 62.4 (52.6 to 71.2) | 52.1 (43.2 to 60.9) | 89.2 (83.0 to 93.4)   |
|                                   | Middle              | 62.9 (52.5 to 72.2)                    | 80.0 (70.0 to 87.3)   | 66.0 (56.1 to 74.6) | 39.4 (31.8 to 47.7) | 90.4 (84.2 to 94.3)   |
|                                   | Richer              | 65.2 (53.4 to 75.4)                    | 78.8 (68.6 to 86.3)   | 68.2 (58.9 to 76.3) | 50.0 (42.2 to 57.8) | 90.9 (85.7 to 94.3)   |
|                                   | Richest             | 86.2 (75.7 to 92.5)                    | 94.4 (87.6 to 97.6)   | 80.0 (70.6 to 87.0) | 54.7 (47.4 to 61.9) | 91.8 (86.5 to 95.2)   |
| Measles immunization              | Poorest             | 52.7 (45.9 to 59.4)                    | 66.1 (56.9 to 74.2)   | 46.5 (39.0 to 54.3) | 44.8 (37.7 to 52.0) | 63.6 (56.3 to 70.4)   |
|                                   | Poorer              | 71.6 (62.8 to 79.0)                    | 83.8 (75.6 to 89.6)   | 72.3 (62.9 to 80.1) | 71.4 (62.7 to 78.8) | 82.7 (75.6 to 88.1)   |
|                                   | Middle              | 82.0 (72.8 to 88.6)                    | 90.0 (81.5 to 94.8)   | 81.4 (72.6 to 87.9) | 69.7 (61.7 to 76.7) | 92.6 (86.9 to 95.9)   |
|                                   | Richer              | 75.4 (64.0 to 84.0)                    | 87.5 (78.5 to 93.1)   | 86.9 (79.2 to 92.0) | 82.5 (75.7 to 87.7) | 87.5 (81.8 to 91.6)   |
|                                   | Richest             | 92.3 (83.2 to 96.7)                    | 96.7 (90.7 to 98.9)   | 90.0 (82.1 to 94.6) | 86.6 (80.8 to 90.8) | 86.2 (79.9 to 90.7)   |
| Full immunization                 | Poorest             | 17.1 (12.5 to 22.8)                    | 47.3 (38.3 to 56.5)   | 25.8 (19.6 to 33.1) | 22.7 (17.2 to 29.3) | 46.6 (39.4 to 54.0)   |
|                                   | Poorer              | 33.6 (25.7 to 42.6)                    | 61.9 (52.4 to 70.6)   | 51.5 (41.9 to 61.0) | 42.0 (33.5 to 51.0) | 66.2 (58.0 to 73.5)   |
|                                   | Middle              | 43.8 (34.0 to 54.2)                    | 71.2 (60.5 to 80.0)   | 54.6 (44.7 to 64.2) | 32.4 (25.2 to 40.5) | 73.3 (65.3 to 80.1)   |
|                                   | Richer              | 47.8 (36.5 to 59.4)                    | 71.2 (60.5 to 80.0)   | 55.1 (45.7 to 64.2) | 42.9 (35.3 to 50.8) | 76.1 (69.3 to 81.8)   |
|                                   | Richest             | 69.2 (57.2 to 79.1)                    | 88.9 (80.7 to 93.9)   | 72.2 (62.2 to 80.4) | 49.2 (41.9 to 56.4) | 76.1 (68.9 to 82.1)   |
| Improved Water                    | Poorest             | 41.0 (40.0 to 42.1)                    | 70.6 (69.5 to 71.8)   | 62.0 (60.9 to 63.0) | 71.7 (70.8 to 72.6) | 74.3 (73.3 to 75.2)   |
|                                   | Poorer              | 66.9 (65.8 to 67.9)                    | 83.7 (82.7 to 84.6)   | 75.0 (74.0 to 76.0) | 91.5 (90.9 to 92.1) | 91.1 (90.4 to 91.8)   |
|                                   | Middle              | 75.2 (74.2 to 76.2)                    | 94.0 (93.4 to 94.6)   | 75.7 (74.7 to 76.7) | 95.2 (94.7 to 95.7) | 96.1 (95.6 to 96.5)   |
|                                   | Richer              | 77.8 (76.8 to 78.8)                    | 96.0 (95.4 to 96.4)   | 73.9 (72.8 to 74.9) | 98.5 (98.2 to 98.7) | 99.4 (99.2 to 99.6)   |
|                                   | Richest             | 92.8 (92.1 to 93.4)                    | 99.4 (99.2 to 99.6)   | 88.4 (87.6 to 89.1) | 99.4 (99.2 to 99.5) | 100.0 (99.9 to 100.0) |
| Adequate sanitation               | Poorest             | 3.0 (2.7 to 3.4)                       | 62.0 (60.8 to 63.2)   | 16.8 (16.0 to 17.7) | 37.6 (36.6 to 38.6) | 34.8 (33.8 to 35.8)   |
|                                   | Poorer              | 17.8 (16.9 to 18.7)                    | 72.5 (71.3 to 73.6)   | 41.3 (40.2 to 42.5) | 65.0 (63.9 to 66.0) | 79.0 (78.1 to 80.0)   |
|                                   | Middle              | 40.6 (39.4 to 41.7)                    | 83.2 (82.3 to 84.2)   | 64.5 (63.3 to 65.6) | 84.9 (84.1 to 85.6) | 94.1 (93.6 to 94.7)   |
|                                   | Richer              | 60.2 (59.0 to 61.4)                    | 90.4 (89.6 to 91.1)   | 84.5 (83.7 to 85.3) | 97.5 (97.2 to 97.8) | 98.7 (98.4 to 98.9)   |
|                                   | Richest             | 93.3 (92.7 to 93.9)                    | 99.5 (99.3 to 99.6)   | 98.6 (98.3 to 98.8) | 99.5 (99.4 to 99.7) | 99.9 (99.8 to 99.9)   |
| Institutional delivery            | Poorest             | NA                                     | 50.8 (45.3 to 56.2)   | 39.4 (33.9 to 45.2) | 62.1 (56.7 to 67.2) | 66.1 (61.1 to 70.8)   |
|                                   | Poorer              | NA                                     | 78.4 (73.3 to 82.8)   | 79.2 (72.7 to 84.5) | 95.1 (91.4 to 97.2) | 96.9 (94.1 to 98.4)   |
|                                   | Middle              | NA                                     | 86.8 (81.8 to 90.6)   | 85.6 (79.9 to 89.8) | 98.8 (96.4 to 99.6) | 99.6 (97.9 to 99.9)   |
|                                   | Richer              | NA                                     | 93.2 (89.0 to 95.9)   | 96.9 (93.5 to 98.6) | 98.1 (95.7 to 99.2) | 100.0 (98.8 to 100.0) |
|                                   | Richest             | NA                                     | 99.2 (97.2 to 99.8)   | 99.4 (96.8 to 99.9) | 99.7 (98.2 to 99.9) | 100.0 (98.7 to 100.0) |
| Poorest                           | 34.8 (28.3 to 41.8) | 58.0 (52.5 to 63.3)                    | 35.6 (30.2 to 41.3)   | 63.3 (58.0 to 68.3) | 70.2 (65.4 to 74.7) |                       |

| Indicators                 | Wealth Quintiles | Estimated coverage in percent (95% CI) |                     |                     |                     |                       |
|----------------------------|------------------|----------------------------------------|---------------------|---------------------|---------------------|-----------------------|
|                            |                  | Year 2000                              | Year 2002           | Year 2006           | Year 2011           | Year 2014             |
| Skilled birth attendance   | Poorer           | 59.2 (49.6 to 68.2)                    | 88.2 (83.9 to 91.4) | 67.4 (60.2 to 73.9) | 95.5 (91.9 to 97.5) | 97.3 (94.6 to 98.7)   |
|                            | Middle           | 61.6 (51.8 to 70.6)                    | 95.2 (91.6 to 97.3) | 70.6 (63.9 to 76.6) | 99.2 (97.0 to 99.8) | 99.6 (97.9 to 99.9)   |
|                            | Richer           | 89.0 (80.9 to 93.9)                    | 97.1 (93.8 to 98.7) | 83.6 (77.8 to 88.1) | 99.3 (97.3 to 99.8) | 100.0 (98.8 to 100.0) |
|                            | Richest          | 98.6 (92.3 to 99.7)                    | 99.6 (97.9 to 99.9) | 93.0 (88.2 to 96.0) | 99.7 (98.2 to 99.9) | 100.0 (98.7 to 100.0) |
| Care seeking for pneumonia | Poorest          | 65.8 (56.8 to 73.8)                    | 79.7 (68.8 to 87.5) | 72.0 (58.3 to 82.5) | 79.5 (64.5 to 89.2) | 78.3 (64.4 to 87.7)   |
|                            | Poorer           | 61.6 (51.1 to 71.2)                    | 85.9 (75.4 to 92.4) | 62.5 (47.0 to 75.8) | 82.6 (62.9 to 93.0) | 95.2 (77.3 to 99.2)   |
|                            | Middle           | 66.0 (51.7 to 77.8)                    | 83.0 (69.9 to 91.1) | 76.6 (62.8 to 86.4) | 81.8 (61.5 to 92.7) | 81.8 (61.5 to 92.7)   |
|                            | Richer           | 50.0 (36.1 to 63.9)                    | 91.4 (77.6 to 97.0) | 85.7 (72.2 to 93.3) | 75.0 (57.9 to 86.7) | 95.5 (78.2 to 99.2)   |
| ARI treatment              | Richest          | 66.7 (48.8 to 80.8)                    | 90.0 (76.9 to 96.0) | 77.8 (54.8 to 91.0) | 64.7 (41.3 to 82.7) | 93.8 (71.7 to 98.9)   |
|                            | Poorest          | NA                                     | NA                  | 48.0 (34.8 to 61.5) | 53.8 (38.6 to 68.4) | 69.6 (55.2 to 80.9)   |
|                            | Poorer           | NA                                     | NA                  | 50.0 (35.2 to 64.8) | 52.2 (33.0 to 70.8) | 95.2 (77.3 to 99.2)   |
|                            | Middle           | NA                                     | NA                  | 53.2 (39.2 to 66.7) | 68.2 (47.3 to 83.6) | 86.4 (66.7 to 95.3)   |
| Oral rehydration therapy   | Richer           | NA                                     | NA                  | 45.2 (31.2 to 60.1) | 78.1 (61.2 to 89.0) | 86.4 (66.7 to 95.3)   |
|                            | Richest          | NA                                     | NA                  | 61.1 (38.6 to 79.7) | 70.6 (46.9 to 86.7) | 93.8 (71.7 to 98.9)   |
|                            | Poorest          | 50.9 (43.5 to 58.2)                    | 34.0 (22.7 to 47.4) | 69.1 (58.4 to 78.1) | 22.5 (15.0 to 32.2) | 23.1 (16.9 to 30.6)   |
|                            | Poorer           | 57.4 (45.5 to 68.4)                    | 26.5 (14.6 to 43.1) | 55.6 (39.6 to 70.5) | 33.3 (21.0 to 48.4) | 25.5 (15.3 to 39.5)   |
| Oral rehydration therapy   | Middle           | 47.9 (34.5 to 61.7)                    | 48.0 (30.0 to 66.5) | 71.0 (53.4 to 83.9) | 39.1 (26.4 to 53.5) | 31.9 (20.4 to 46.2)   |
|                            | Richer           | 63.9 (47.6 to 77.5)                    | 57.1 (32.6 to 78.6) | 58.1 (40.8 to 73.6) | 24.4 (14.2 to 38.7) | 45.0 (30.7 to 60.2)   |
|                            | Richest          | 66.7 (47.8 to 81.4)                    | 58.3 (32.0 to 80.7) | 73.7 (51.2 to 88.2) | 32.6 (20.5 to 47.5) | 45.5 (29.8 to 62.0)   |

**Table S10: Predicted coverage of RMNCH service in Vietnam by wealth quintiles, 2015–2030**

| Indicators                        | Wealth Quintiles | Predicted coverage in percent (95% CrI) |                        |                        | Probability reach target (%) |
|-----------------------------------|------------------|-----------------------------------------|------------------------|------------------------|------------------------------|
|                                   |                  | Year 2015                               | Year 2020              | Year 2030              |                              |
| At least one ANC visit            | Poorest          | 80.9 (77.5 to 84.1)                     | 86.8 (82.7 to 90.0)    | 94.0 (90.2 to 96.4)    | 100.0                        |
|                                   | Poorer           | 98.6 (97.5 to 99.3)                     | 99.5 (98.8 to 99.8)    | 99.9 (99.7 to 100.0)   | 100.0                        |
|                                   | Middle           | 99.6 (99.1 to 99.9)                     | 99.9 (99.7 to 100.0)   | 100.0 (99.9 to 100.0)  | 100.0                        |
|                                   | Richer           | 99.7 (99.1 to 99.9)                     | 99.9 (99.6 to 100.0)   | 100.0 (99.9 to 100.0)  | 100.0                        |
|                                   | Richest          | 99.6 (98.8 to 99.9)                     | 99.8 (98.5 to 100.0)   | 99.9 (97.8 to 100.0)   | 100.0                        |
| At least four ANC visit           | Poorest          | 30.8 (26.5 to 35.3)                     | 40.1 (32.2 to 48.4)    | 60.4 (44.3 to 74.3)    | 0.1                          |
|                                   | Poorer           | 66.6 (61.4 to 71.7)                     | 82.4 (76.5 to 87.2)    | 96.2 (92.9 to 98.1)    | 100.0                        |
|                                   | Middle           | 77.5 (73.2 to 81.4)                     | 89.7 (85.7 to 92.7)    | 98.2 (96.5 to 99.1)    | 100.0                        |
|                                   | Richer           | 89.7 (86.8 to 92.2)                     | 96.3 (94.5 to 97.6)    | 99.6 (99.1 to 99.8)    | 100.0                        |
|                                   | Richest          | 95.5 (93.6 to 97.0)                     | 98.3 (97.2 to 99.1)    | 99.8 (99.4 to 99.9)    | 100.0                        |
| Exclusive breastfeeding           | Poorest          | 35.1 (27.2 to 43.5)                     | 42.8 (30.5 to 56.2)    | 58.9 (36.8 to 78.7)    | 1.7                          |
|                                   | Poorer           | 16.5 (10.1 to 25.0)                     | 18.4 (9.1 to 32.6)     | 22.5 (7.0 to 52.2)     | 0.0                          |
|                                   | Middle           | 19.7 (13.1 to 28.0)                     | 22.4 (12.1 to 36.7)    | 28.3 (9.8 to 58.5)     | 0.0                          |
|                                   | Richer           | 7.2 (3.7 to 12.9)                       | 4.9 (1.8 to 11.4)      | 2.2 (0.4 to 9.5)       | 0.0                          |
|                                   | Richest          | 14.1 (7.7 to 22.9)                      | 18.7 (7.7 to 37.4)     | 31.3 (7.3 to 72.7)     | 0.7                          |
| Early initiation of breastfeeding | Poorest          | 48.4 (45.0 to 51.9)                     | 44.9 (40.8 to 49.2)    | 38.3 (32.2 to 44.9)    | 0.0                          |
|                                   | Poorer           | 45.1 (41.5 to 48.8)                     | 41.7 (37.3 to 46.3)    | 35.3 (29.1 to 42.0)    | 0.0                          |
|                                   | Middle           | 43.8 (40.1 to 47.4)                     | 40.5 (36.1 to 45.0)    | 34.1 (28.2 to 40.7)    | 0.0                          |
|                                   | Richer           | 39.2 (35.7 to 42.8)                     | 36.0 (31.9 to 40.2)    | 30.0 (24.5 to 36.1)    | 0.0                          |
|                                   | Richest          | 37.6 (34.3 to 41.0)                     | 34.4 (30.5 to 38.7)    | 28.6 (23.2 to 34.5)    | 0.0                          |
| Family planning needs satisfied   | Poorest          | 65.6 (62.9 to 68.2)                     | 59.2 (54.7 to 63.8)    | 45.7 (37.1 to 54.9)    | 0.0                          |
|                                   | Poorer           | 61.2 (58.2 to 63.8)                     | 54.7 (49.7 to 59.1)    | 41.4 (32.8 to 49.9)    | 0.0                          |
|                                   | Middle           | 59.8 (57.1 to 62.5)                     | 54.6 (50.0 to 59.0)    | 43.9 (35.8 to 51.9)    | 0.0                          |
|                                   | Richer           | 56.9 (54.4 to 59.6)                     | 51.4 (47.3 to 55.7)    | 40.3 (33.2 to 48.4)    | 0.0                          |
|                                   | Richest          | 63.7 (61.3 to 66.0)                     | 62.8 (58.9 to 66.6)    | 61.1 (53.7 to 68.4)    | 0.0                          |
| BCG immunization                  | Poorest          | 83.9 (80.0 to 87.3)                     | 86.9 (82.2 to 90.5)    | 91.4 (85.8 to 95.1)    | 100.0                        |
|                                   | Poorer           | 95.0 (92.9 to 96.6)                     | 96.0 (93.8 to 97.4)    | 97.5 (95.3 to 98.7)    | 100.0                        |
|                                   | Middle           | 96.4 (94.7 to 97.7)                     | 97.2 (95.5 to 98.3)    | 98.2 (96.6 to 99.1)    | 100.0                        |
|                                   | Richer           | 97.7 (96.4 to 98.7)                     | 98.2 (97.0 to 99.0)    | 98.9 (97.8 to 99.5)    | 100.0                        |
|                                   | Richest          | 98.8 (97.9 to 99.4)                     | 99.1 (98.2 to 99.6)    | 99.4 (98.8 to 99.8)    | 100.0                        |
| DPT3 immunization                 | Poorest          | 45.7 (41.2 to 50.2)                     | 47.9 (42.1 to 53.8)    | 52.4 (43.3 to 61.1)    | 0.0                          |
|                                   | Poorer           | 65.7 (60.9 to 70.1)                     | 67.6 (61.8 to 72.9)    | 71.3 (63.0 to 78.5)    | 0.7                          |
|                                   | Middle           | 67.6 (62.9 to 72.1)                     | 69.6 (63.9 to 74.8)    | 73.1 (65.1 to 79.9)    | 2.4                          |
|                                   | Richer           | 74.2 (70.1 to 77.9)                     | 75.8 (71.0 to 80.2)    | 78.9 (72.2 to 84.4)    | 34.9                         |
|                                   | Richest          | 82.3 (78.7 to 85.4)                     | 83.6 (79.5 to 86.9)    | 85.9 (80.6 to 89.8)    | 98.3                         |
| Polio3 immunization               | Poorest          | 48.5 (44.1 to 53.0)                     | 52.3 (46.7 to 58.1)    | 59.7 (51.2 to 68.1)    | 0.0                          |
|                                   | Poorer           | 70.2 (65.7 to 74.4)                     | 73.3 (67.9 to 77.9)    | 78.8 (71.9 to 84.2)    | 34.2                         |
|                                   | Middle           | 71.4 (67.1 to 75.5)                     | 74.4 (69.3 to 79.0)    | 79.7 (73.3 to 85.0)    | 46.6                         |
|                                   | Richer           | 75.3 (71.2 to 79.0)                     | 78.0 (73.5 to 81.9)    | 82.8 (77.0 to 87.3)    | 83.9                         |
|                                   | Richest          | 81.7 (78.2 to 84.7)                     | 83.8 (80.0 to 87.0)    | 87.5 (82.8 to 91.1)    | 99.9                         |
| Measles immunization              | Poorest          | 53.9 (49.2 to 58.7)                     | 54.0 (47.6 to 60.2)    | 54.2 (44.0 to 63.7)    | 0.0                          |
|                                   | Poorer           | 76.6 (72.3 to 80.8)                     | 76.7 (71.2 to 81.5)    | 76.8 (68.3 to 83.5)    | 18.9                         |
|                                   | Middle           | 82.6 (78.8 to 85.9)                     | 82.6 (77.8 to 86.5)    | 82.7 (75.7 to 87.8)    | 79.7                         |
|                                   | Richer           | 84.7 (81.2 to 87.7)                     | 84.7 (80.5 to 88.1)    | 84.8 (78.7 to 89.4)    | 94.6                         |
|                                   | Richest          | 89.3 (86.3 to 91.7)                     | 89.3 (85.9 to 92.0)    | 89.3 (84.5 to 92.8)    | 100.0                        |
| Full immunization                 | Poorest          | 34.2 (30.0 to 38.6)                     | 36.8 (31.4 to 42.5)    | 42.2 (33.7 to 51.1)    | 0.0                          |
|                                   | Poorer           | 55.9 (50.9 to 60.6)                     | 58.6 (52.5 to 64.4)    | 63.9 (55.5 to 71.9)    | 0.0                          |
|                                   | Middle           | 58.2 (53.4 to 63.0)                     | 60.9 (55.1 to 66.6)    | 66.1 (57.8 to 73.9)    | 0.0                          |
|                                   | Richer           | 63.0 (58.7 to 67.5)                     | 65.6 (60.4 to 70.7)    | 70.5 (63.1 to 77.3)    | 0.2                          |
|                                   | Richest          | 71.6 (67.5 to 75.6)                     | 73.9 (69.0 to 78.3)    | 78.0 (71.4 to 83.5)    | 24.3                         |
| Improved Water                    | Poorest          | 77.4 (76.7 to 78.1)                     | 83.7 (82.9 to 84.4)    | 92.0 (91.3 to 92.6)    | 100.0                        |
|                                   | Poorer           | 92.5 (92.0 to 92.9)                     | 95.5 (95.1 to 95.9)    | 98.5 (98.2 to 98.7)    | 100.0                        |
|                                   | Middle           | 95.3 (95.0 to 95.7)                     | 97.3 (97.0 to 97.6)    | 99.1 (99.0 to 99.3)    | 100.0                        |
|                                   | Richer           | 97.6 (97.3 to 97.8)                     | 98.9 (98.7 to 99.0)    | 99.8 (99.7 to 99.8)    | 100.0                        |
|                                   | Richest          | 98.9 (98.7 to 99.0)                     | 99.4 (99.3 to 99.5)    | 99.8 (99.8 to 99.9)    | 100.0                        |
| Adequate sanitation               | Poorest          | 38.8 (38.0 to 39.7)                     | 45.6 (44.2 to 46.9)    | 59.2 (57.0 to 61.5)    | 0.0                          |
|                                   | Poorer           | 78.0 (77.3 to 78.7)                     | 87.1 (86.4 to 87.8)    | 96.1 (95.7 to 96.5)    | 100.0                        |
|                                   | Middle           | 92.5 (92.1 to 92.9)                     | 96.5 (96.3 to 96.8)    | 99.3 (99.2 to 99.4)    | 100.0                        |
|                                   | Richer           | 98.8 (98.7 to 98.9)                     | 99.7 (99.6 to 99.7)    | 100.0 (100.0 to 100.0) | 100.0                        |
|                                   | Richest          | 99.9 (99.9 to 99.9)                     | 100.0 (100.0 to 100.0) | 100.0 (100.0 to 100.0) | 100.0                        |
| Institutional delivery            | Poorest          | 66.2 (61.8 to 70.4)                     | 73.4 (67.1 to 79.0)    | 84.7 (76.5 to 90.5)    | 89.1                         |
|                                   | Poorer           | 96.8 (95.1 to 98.1)                     | 98.6 (97.4 to 99.4)    | 99.8 (99.3 to 99.9)    | 100.0                        |
|                                   | Middle           | 99.0 (98.0 to 99.6)                     | 99.7 (99.1 to 99.9)    | 100.0 (99.8 to 100.0)  | 100.0                        |
|                                   | Richer           | 99.6 (98.9 to 99.9)                     | 99.9 (99.4 to 100.0)   | 100.0 (99.8 to 100.0)  | 100.0                        |
|                                   | Richest          | 99.9 (99.4 to 100.0)                    | 100.0 (99.2 to 100.0)  | 100.0 (98.9 to 100.0)  | 100.0                        |
| Skilled birth attendance          | Poorest          | 74.7 (71.4 to 77.5)                     | 83.9 (80.6 to 86.7)    | 94.3 (91.8 to 95.9)    | 100.0                        |



| Indicators                 | Wealth Quintiles | Predicted coverage in percent (95% CrI) |                     |                      | Probability reach target (%) |
|----------------------------|------------------|-----------------------------------------|---------------------|----------------------|------------------------------|
|                            |                  | Year 2015                               | Year 2020           | Year 2030            |                              |
| Care seeking for pneumonia | Poorer           | 94.2 (92.8 to 95.4)                     | 96.6 (95.6 to 97.5) | 98.9 (98.3 to 99.3)  | 100.0                        |
|                            | Middle           | 95.7 (94.5 to 96.6)                     | 97.5 (96.7 to 98.2) | 99.2 (98.8 to 99.5)  | 100.0                        |
|                            | Richer           | 98.1 (97.4 to 98.6)                     | 98.9 (98.4 to 99.3) | 99.7 (99.4 to 99.8)  | 100.0                        |
|                            | Richest          | 99.5 (99.1 to 99.7)                     | 99.7 (99.5 to 99.8) | 99.9 (99.8 to 100.0) | 100.0                        |
|                            | Poorest          | 84.2 (77.4 to 89.2)                     | 87.9 (80.1 to 92.7) | 93.1 (84.8 to 96.9)  | 99.8                         |
|                            | Poorer           | 85.0 (78.0 to 90.1)                     | 88.6 (80.8 to 93.4) | 93.5 (85.5 to 97.2)  | 99.7                         |
|                            | Middle           | 86.3 (79.5 to 91.2)                     | 89.6 (82.5 to 94.0) | 94.1 (87.0 to 97.4)  | 100.0                        |
|                            | Richer           | 86.0 (79.3 to 90.8)                     | 89.4 (82.4 to 93.7) | 94.0 (86.9 to 97.3)  | 100.0                        |
|                            | Richest          | 88.1 (80.8 to 93.0)                     | 91.0 (83.7 to 95.3) | 95.0 (88.1 to 97.9)  | 100.0                        |
|                            | Poorest          | 76.8 (67.2 to 84.3)                     | 89.2 (80.1 to 94.5) | 98.1 (93.5 to 99.5)  | 100.0                        |
|                            | Poorer           | 82.8 (72.9 to 89.8)                     | 92.3 (84.1 to 96.5) | 98.7 (95.1 to 99.7)  | 100.0                        |
|                            | ARI treatment    | Middle                                  | 85.2 (76.1 to 91.6) | 93.5 (86.1 to 97.1)  | 98.9 (95.8 to 99.7)          |
|                            | Richer           | 84.6 (76.2 to 90.9)                     | 93.2 (86.4 to 96.9) | 98.8 (95.8 to 99.7)  | 100.0                        |
|                            | Richest          | 88.7 (78.9 to 94.3)                     | 95.1 (88.6 to 98.0) | 99.2 (96.8 to 99.8)  | 100.0                        |
|                            | Poorest          | 24.9 (20.3 to 30.1)                     | 18.3 (13.6 to 23.8) | 9.1 (5.5 to 14.5)    | 0.0                          |
| Oral rehydration therapy   | Poorer           | 25.6 (20.0 to 32.4)                     | 18.8 (13.4 to 25.6) | 9.4 (5.5 to 15.4)    | 0.0                          |
|                            | Middle           | 30.8 (24.1 to 38.1)                     | 23.1 (16.8 to 30.6) | 11.9 (7.1 to 18.8)   | 0.0                          |
|                            | Richer           | 32.9 (25.6 to 41.1)                     | 24.8 (18.0 to 33.1) | 13.0 (7.9 to 20.5)   | 0.0                          |
|                            | Richest          | 37.4 (29.1 to 46.5)                     | 28.6 (20.6 to 38.2) | 15.4 (9.2 to 24.2)   | 0.0                          |

**Table S11: Observed coverage of RMNCH service in Vietnam by living areas, 2000–2014**

| Indicators                        | Living Area | Estimated coverage in percent (95% CI) |                     |                     |                     |                     |
|-----------------------------------|-------------|----------------------------------------|---------------------|---------------------|---------------------|---------------------|
|                                   |             | Year 2000                              | Year 2002           | Year 2006           | Year 2011           | Year 2014           |
| At least one ANC visit            | Rural       | 64.4 (59.9 to 68.7)                    | 84.3 (82.0 to 86.4) | 83.2 (80.4 to 85.6) | 89.5 (87.2 to 91.4) | 92.0 (90.1 to 93.6) |
|                                   | Urban       | 95.7 (89.3 to 98.3)                    | 96.3 (93.2 to 98.0) | 97.8 (94.9 to 99.1) | 98.0 (96.4 to 98.9) | 98.7 (97.4 to 99.4) |
| At least four ANC visit           | Rural       | NA                                     | 23.8 (21.3 to 26.5) | NA                  | 45.3 (41.9 to 48.7) | 62.0 (58.8 to 65.1) |
|                                   | Urban       | NA                                     | 52.4 (46.5 to 58.3) | NA                  | 76.2 (72.4 to 79.6) | 83.0 (79.6 to 85.9) |
| Exclusive breastfeeding           | Rural       | 19.1 (14.7 to 24.5)                    | 10.7 (7.3 to 15.4)  | 18.9 (14.2 to 24.8) | 18.8 (14.2 to 24.5) | 23.7 (18.9 to 29.2) |
|                                   | Urban       | 12.8 (6.0 to 25.2)                     | 10.0 (4.7 to 20.1)  | 7.4 (2.9 to 17.6)   | 10.9 (6.6 to 17.5)  | 15.7 (10.8 to 22.3) |
| Early initiation of breastfeeding | Rural       | NA                                     | 61.5 (58.5 to 64.4) | 20.3 (17.2 to 23.9) | 60.5 (57.2 to 63.8) | 45.2 (42.1 to 48.5) |
|                                   | Urban       | NA                                     | 53.2 (47.2 to 59.1) | 24.2 (18.8 to 30.4) | 46.9 (42.7 to 51.1) | 35.7 (31.8 to 39.7) |
| Family planning needs satisfied   | Rural       | NA                                     | 73.4 (71.8 to 74.9) | NA                  | 66.0 (64.5 to 67.5) | 63.9 (62.2 to 65.6) |
|                                   | Urban       | NA                                     | 69.2 (66.2 to 72.0) | NA                  | 63.2 (61.4 to 65.0) | 60.4 (58.3 to 62.5) |
| BCG immunization                  | Rural       | 83.6 (79.9 to 86.8)                    | 92.7 (89.5 to 94.9) | 79.7 (75.7 to 83.2) | 91.3 (88.4 to 93.6) | 93.3 (90.7 to 95.2) |
|                                   | Urban       | 98.0 (92.9 to 99.4)                    | 98.0 (92.9 to 99.4) | 94.8 (89.1 to 97.6) | 95.8 (93.0 to 97.6) | 99.0 (97.2 to 99.7) |
| DPT3 immunization                 | Rural       | 44.6 (40.1 to 49.3)                    | 69.3 (64.4 to 73.8) | 57.6 (53.0 to 62.2) | 43.1 (38.6 to 47.6) | 73.6 (69.5 to 77.3) |
|                                   | Urban       | 75.5 (66.1 to 83.0)                    | 84.8 (76.5 to 90.6) | 84.3 (76.6 to 89.9) | 62.9 (57.5 to 68.1) | 79.5 (74.7 to 83.7) |
| Polio3 immunization               | Rural       | 43.3 (38.8 to 47.9)                    | 70.7 (65.8 to 75.1) | 55.4 (50.7 to 59.9) | 38.3 (34.0 to 42.8) | 80.7 (76.9 to 84.0) |
|                                   | Urban       | 82.7 (74.0 to 88.9)                    | 90.9 (83.6 to 95.1) | 78.3 (69.9 to 84.8) | 54.3 (48.8 to 59.7) | 89.9 (86.1 to 92.8) |
| Measles immunization              | Rural       | 65.7 (61.2 to 70.0)                    | 81.8 (77.5 to 85.4) | 68.3 (63.8 to 72.5) | 62.8 (58.3 to 67.1) | 81.6 (77.8 to 84.8) |
|                                   | Urban       | 84.7 (76.3 to 90.5)                    | 90.9 (83.6 to 95.1) | 87.0 (79.6 to 91.9) | 82.1 (77.5 to 86.0) | 82.5 (77.8 to 86.3) |
| Full immunization                 | Rural       | 28.9 (24.9 to 33.3)                    | 63.0 (58.0 to 67.8) | 43.5 (38.9 to 48.2) | 31.4 (27.3 to 35.8) | 66.2 (61.9 to 70.3) |
|                                   | Urban       | 63.3 (53.4 to 72.1)                    | 80.8 (72.0 to 87.4) | 68.7 (59.7 to 76.5) | 46.6 (41.2 to 52.2) | 68.8 (63.5 to 73.7) |
| Improved Water                    | Rural       | 62.0 (61.5 to 62.6)                    | 86.5 (86.0 to 86.9) | 69.6 (69.1 to 70.2) | 86.5 (86.1 to 87.0) | 87.9 (87.4 to 88.3) |
|                                   | Urban       | 91.6 (91.0 to 92.2)                    | 97.4 (97.1 to 97.8) | 90.9 (90.3 to 91.5) | 97.7 (97.5 to 97.9) | 97.6 (97.3 to 97.8) |
| Adequate sanitation               | Rural       | 28.5 (28.0 to 29.1)                    | 78.0 (77.5 to 78.5) | 50.9 (50.3 to 51.5) | 67.0 (66.4 to 67.6) | 72.3 (71.7 to 72.9) |
|                                   | Urban       | 77.1 (76.1 to 78.0)                    | 95.3 (94.8 to 95.7) | 89.8 (89.2 to 90.4) | 91.7 (91.3 to 92.1) | 92.0 (91.6 to 92.4) |
| Institutional delivery            | Rural       | NA                                     | 74.8 (72.1 to 77.4) | 69.6 (66.4 to 72.7) | 83.9 (81.3 to 86.3) | 86.8 (84.5 to 88.9) |
|                                   | Urban       | NA                                     | 98.5 (96.2 to 99.4) | 99.1 (96.8 to 99.8) | 97.8 (96.2 to 98.7) | 98.2 (96.7 to 99.0) |
| Skilled birth attendance          | Rural       | 54.4 (49.8 to 58.9)                    | 82.4 (80.0 to 84.6) | 59.6 (56.2 to 63.0) | 84.7 (82.0 to 87.0) | 88.4 (86.2 to 90.3) |
|                                   | Urban       | 95.7 (89.3 to 98.3)                    | 98.5 (96.2 to 99.4) | 91.2 (86.7 to 94.2) | 98.3 (96.9 to 99.1) | 98.4 (97.0 to 99.1) |
| Care seeking for pneumonia        | Rural       | 62.8 (57.0 to 68.2)                    | 84.0 (78.5 to 88.3) | 75.5 (68.3 to 81.4) | 81.1 (71.8 to 87.9) | 84.7 (75.6 to 90.8) |
|                                   | Urban       | 61.4 (46.6 to 74.3)                    | 90.5 (77.9 to 96.2) | 70.6 (53.8 to 83.2) | 69.8 (54.9 to 81.4) | 90.5 (77.9 to 96.2) |
| ARI treatment                     | Rural       | NA                                     | NA                  | 50.3 (42.7 to 57.9) | 63.3 (53.0 to 72.6) | 77.6 (67.7 to 85.2) |
|                                   | Urban       | NA                                     | NA                  | 50.0 (34.1 to 65.9) | 65.1 (50.2 to 77.6) | 92.9 (81.0 to 97.5) |
| Oral rehydration therapy          | Rural       | 53.8 (48.3 to 59.2)                    | 38.9 (30.8 to 47.6) | 66.3 (59.0 to 72.9) | 28.7 (22.7 to 35.6) | 25.8 (20.5 to 31.9) |
|                                   | Urban       | 57.9 (42.2 to 72.1)                    | 41.7 (19.3 to 68.0) | 60.9 (40.8 to 77.8) | 29.9 (20.8 to 40.8) | 40.4 (30.9 to 50.8) |

**Table S12: Predicted coverage of RMNCH service in Vietnam by living areas, 2015–2030**

| Indicators                        | Living Area | Predicted coverage in percent (95% CrI) |                     |                     | Probability reach target (%) |
|-----------------------------------|-------------|-----------------------------------------|---------------------|---------------------|------------------------------|
|                                   |             | Year 2015                               | Year 2020           | Year 2030           |                              |
| At least one ANC visit            | Rural       | 92.9 (91.6 to 94.1)                     | 95.5 (94.2 to 96.6) | 98.3 (97.4 to 98.9) | 100.0                        |
|                                   | Urban       | 98.9 (98.4 to 99.2)                     | 99.3 (99.0 to 99.5) | 99.7 (99.6 to 99.8) | 100.0                        |
| At least four ANC visit           | Rural       | 62.0 (59.5 to 64.6)                     | 75.7 (72.7 to 78.6) | 91.9 (89.6 to 93.9) | 100.0                        |
|                                   | Urban       | 84.8 (82.8 to 86.5)                     | 91.4 (89.8 to 92.8) | 97.5 (96.6 to 98.1) | 100.0                        |
| Exclusive breastfeeding           | Rural       | 22.7 (18.8 to 27.1)                     | 25.8 (19.8 to 33.0) | 32.8 (21.7 to 46.9) | 0.0                          |
|                                   | Urban       | 14.5 (10.9 to 18.7)                     | 16.6 (11.9 to 22.6) | 21.9 (13.7 to 33.2) | 0.0                          |
| Early initiation of breastfeeding | Rural       | 46.3 (43.7 to 48.9)                     | 43.5 (39.7 to 47.5) | 38.2 (32.2 to 44.6) | 0.0                          |
|                                   | Urban       | 38.2 (35.3 to 41.1)                     | 35.6 (32.0 to 39.3) | 30.6 (25.3 to 36.3) | 0.0                          |
| Family planning needs satisfied   | Rural       | 63.0 (61.7 to 64.3)                     | 58.8 (56.7 to 60.8) | 49.9 (46.2 to 53.8) | 0.0                          |
|                                   | Urban       | 59.5 (58.0 to 61.0)                     | 55.2 (53.0 to 57.3) | 46.2 (42.6 to 50.0) | 0.0                          |
| BCG immunization                  | Rural       | 91.8 (89.7 to 93.6)                     | 93.5 (90.9 to 95.4) | 95.9 (90.9 to 97.7) | 100.0                        |
|                                   | Urban       | 98.0 (97.0 to 98.7)                     | 98.4 (97.4 to 99.0) | 99.0 (98.1 to 99.5) | 100.0                        |
| DPT3 immunization                 | Rural       | 63.2 (59.5 to 66.9)                     | 66.7 (61.4 to 71.6) | 73.0 (64.8 to 80.0) | 2.3                          |
|                                   | Urban       | 71.8 (67.1 to 76.3)                     | 69.1 (60.8 to 76.6) | 63.2 (46.8 to 77.3) | 0.8                          |
| Polio3 immunization               | Rural       | 62.9 (59.5 to 66.2)                     | 66.1 (61.4 to 70.5) | 72.1 (64.9 to 78.3) | 0.6                          |
|                                   | Urban       | 78.8 (75.8 to 81.4)                     | 81.0 (77.6 to 84.1) | 85.0 (80.4 to 88.7) | 98.1                         |
| Measles immunization              | Rural       | 74.1 (70.8 to 77.3)                     | 75.4 (70.6 to 79.8) | 77.9 (70.2 to 84.5) | 28.1                         |
|                                   | Urban       | 81.4 (77.1 to 84.9)                     | 78.7 (70.6 to 84.6) | 72.3 (54.1 to 84.6) | 12.8                         |
| Full immunization                 | Rural       | 54.6 (50.7 to 58.3)                     | 59.6 (54.0 to 64.8) | 69.1 (60.5 to 76.5) | 0.1                          |
|                                   | Urban       | 58.0 (53.0 to 63.0)                     | 54.4 (46.8 to 62.3) | 47.0 (33.7 to 61.4) | 0.0                          |
| Improved Water                    | Rural       | 88.4 (88.1 to 88.7)                     | 92.0 (91.7 to 92.3) | 96.4 (96.2 to 96.6) | 100.0                        |
|                                   | Urban       | 97.7 (97.6 to 97.8)                     | 98.5 (98.4 to 98.6) | 99.3 (99.3 to 99.4) | 100.0                        |
| Adequate sanitation               | Rural       | 73.6 (73.2 to 74.0)                     | 80.5 (80.0 to 80.9) | 90.0 (89.6 to 90.5) | 100.0                        |
|                                   | Urban       | 94.1 (93.9 to 94.3)                     | 95.9 (95.8 to 96.1) | 98.1 (98.0 to 98.2) | 100.0                        |
| Institutional delivery            | Rural       | 86.4 (84.5 to 88.3)                     | 90.1 (87.9 to 92.1) | 95.0 (92.7 to 96.6) | 100.0                        |
|                                   | Urban       | 97.9 (96.5 to 98.9)                     | 97.5 (93.7 to 99.0) | 96.4 (79.8 to 99.4) | 97.4                         |
| Skilled birth attendance          | Rural       | 86.9 (85.1 to 88.5)                     | 91.0 (89.0 to 92.6) | 95.9 (94.2 to 97.1) | 100.0                        |
|                                   | Urban       | 98.4 (97.9 to 98.8)                     | 99.0 (98.6 to 99.3) | 99.5 (99.3 to 99.7) | 100.0                        |
| Care seeking for pneumonia        | Rural       | 85.7 (80.5 to 89.9)                     | 89.1 (83.1 to 93.4) | 93.9 (87.4 to 97.3) | 99.9                         |
|                                   | Urban       | 85.0 (79.0 to 90.0)                     | 88.6 (82.2 to 93.3) | 93.6 (86.9 to 97.2) | 99.9                         |
| ARI treatment                     | Rural       | 80.6 (73.3 to 86.4)                     | 90.6 (83.0 to 95.0) | 98.1 (93.9 to 99.5) | 100.0                        |
|                                   | Urban       | 84.2 (76.2 to 90.0)                     | 92.6 (85.9 to 96.2) | 98.5 (95.0 to 99.6) | 100.0                        |
| Oral rehydration therapy          | Rural       | 27.8 (23.3 to 32.6)                     | 20.8 (15.7 to 26.4) | 10.8 (6.5 to 16.6)  | 0.0                          |
|                                   | Urban       | 31.7 (25.6 to 38.2)                     | 23.9 (18.0 to 30.7) | 12.6 (7.9 to 19.1)  | 0.0                          |

**Table S13: Observed coverage of RMNCH service in Vietnam by regional levels, 2000–2014**

| Indicators                      | Regions                           | Estimated coverage in percent (95% CI) |                       |                     |                     |                       |
|---------------------------------|-----------------------------------|----------------------------------------|-----------------------|---------------------|---------------------|-----------------------|
|                                 |                                   | Year 2000                              | Year 2002             | Year 2006           | Year 2011           | Year 2014             |
| At least one ANC visit          | Northwest                         | 43.9 (33.7 to 54.7)                    | 36.5 (26.4 to 47.9)   | 68.5 (61.0 to 75.2) | 65.8 (57.0 to 73.7) | 67.8 (58.8 to 75.7)   |
|                                 | Northeast                         | 55.3 (41.2 to 68.6)                    | 97.0 (92.6 to 98.8)   | 74.7 (63.8 to 83.1) | 91.7 (86.6 to 95.0) | 93.6 (88.8 to 96.4)   |
|                                 | Red River Delta                   | 93.3 (85.3 to 97.1)                    | 96.2 (93.1 to 97.9)   | 99.2 (95.8 to 99.9) | 99.5 (97.1 to 99.9) | 98.6 (96.1 to 99.5)   |
|                                 | North Central                     | 60.7 (47.6 to 72.4)                    | 88.9 (83.3 to 92.8)   | 94.4 (88.3 to 97.4) | 98.4 (94.2 to 99.5) | 100.0 (96.7 to 100.0) |
|                                 | South Central Coast               | 78.5 (68.2 to 86.1)                    | 86.0 (80.3 to 90.3)   | 88.9 (82.2 to 93.3) | 95.3 (88.5 to 98.2) | 98.2 (93.7 to 99.5)   |
|                                 | Central Highlands                 | 52.6 (42.7 to 62.2)                    | 77.9 (66.7 to 86.2)   | 79.3 (72.9 to 84.4) | 89.3 (85.1 to 92.5) | 91.9 (88.3 to 94.4)   |
|                                 | Southeast                         | 93.2 (81.8 to 97.7)                    | 92.2 (86.6 to 95.6)   | 98.0 (93.1 to 99.5) | 99.5 (97.4 to 99.9) | 99.2 (97.1 to 99.8)   |
|                                 | Mekong River Delta                | 90.0 (80.8 to 95.1)                    | 84.8 (80.1 to 88.5)   | 94.7 (89.5 to 97.4) | 97.3 (93.9 to 98.9) | 99.5 (97.3 to 99.9)   |
|                                 | At least four ANC visit           | Northwest                              | NA                    | 5.4 (2.1 to 13.1)   | NA                  | 30.0 (22.5 to 38.7)   |
| Northeast                       |                                   | NA                                     | 25.9 (19.3 to 33.9)   | NA                  | 45.6 (38.2 to 53.1) | 67.8 (60.5 to 74.4)   |
| Red River Delta                 |                                   | NA                                     | 47.3 (41.3 to 53.4)   | NA                  | 77.6 (71.2 to 82.9) | 86.4 (81.3 to 90.3)   |
| North Central                   |                                   | NA                                     | 27.5 (21.3 to 34.6)   | NA                  | 52.5 (43.7 to 61.1) | 75.7 (66.9 to 82.7)   |
| South Central Coast             |                                   | NA                                     | 19.4 (14.3 to 25.6)   | NA                  | 62.4 (51.7 to 71.9) | 64.9 (55.6 to 73.1)   |
| Central Highlands               |                                   | NA                                     | 23.5 (15.0 to 34.9)   | NA                  | 39.7 (34.1 to 45.6) | 51.0 (45.4 to 56.5)   |
| Southeast                       |                                   | NA                                     | 43.3 (35.4 to 51.5)   | NA                  | 86.5 (81.3 to 90.4) | 90.2 (85.8 to 93.3)   |
| Mekong River Delta              |                                   | NA                                     | 24.1 (19.5 to 29.4)   | NA                  | 59.6 (52.4 to 66.3) | 76.8 (70.6 to 82.1)   |
| Exclusive breastfeeding         |                                   | Northwest                              | 34.0 (22.4 to 47.8)   | 0.0 (0.0 to 17.6)   | 26.9 (16.8 to 40.3) | 50.0 (35.2 to 64.8)   |
|                                 | Northeast                         | 11.5 (4.0 to 29.0)                     | 14.3 (5.7 to 31.5)    | 55.6 (33.7 to 75.4) | 25.0 (14.9 to 38.8) | 29.5 (19.6 to 41.9)   |
|                                 | Red River Delta                   | 30.3 (17.4 to 47.3)                    | 13.8 (7.2 to 24.9)    | 21.2 (10.7 to 37.8) | 14.5 (7.6 to 26.2)  | 23.0 (14.2 to 34.9)   |
|                                 | North Central                     | 40.0 (24.6 to 57.7)                    | 26.5 (14.6 to 43.1)   | 11.4 (4.5 to 26.0)  | 15.2 (6.7 to 30.9)  | 33.3 (19.8 to 50.4)   |
|                                 | South Central Coast               | 2.3 (0.4 to 11.8)                      | 0.0 (0.0 to 10.2)     | 16.1 (7.1 to 32.6)  | 0.0 (0.0 to 14.9)   | 14.3 (5.7 to 31.5)    |
|                                 | Central Highlands                 | 4.4 (1.2 to 14.8)                      | 28.6 (11.7 to 54.6)   | 8.1 (2.8 to 21.3)   | 9.7 (4.5 to 19.5)   | 20.7 (13.4 to 30.7)   |
|                                 | Southeast                         | 0.0 (0.0 to 14.3)                      | 6.7 (1.8 to 21.3)     | 0.0 (0.0 to 14.3)   | 6.5 (2.2 to 17.5)   | 6.2 (2.4 to 14.8)     |
|                                 | Mekong River Delta                | 19.0 (10.0 to 33.3)                    | 4.4 (1.5 to 12.2)     | 0.0 (0.0 to 11.0)   | 2.5 (0.4 to 12.9)   | 11.3 (5.3 to 22.6)    |
|                                 | Early initiation of breastfeeding | Northwest                              | NA                    | 56.8 (45.4 to 67.4) | 10.0 (4.0 to 23.1)  | 79.2 (71.1 to 85.5)   |
| Northeast                       |                                   | NA                                     | 74.1 (66.1 to 80.7)   | 23.1 (14.5 to 34.6) | 63.9 (56.4 to 70.8) | 43.9 (36.6 to 51.4)   |
| Red River Delta                 |                                   | NA                                     | 61.9 (55.9 to 67.6)   | 12.3 (7.7 to 19.1)  | 47.9 (41.0 to 55.0) | 37.1 (31.0 to 43.6)   |
| North Central                   |                                   | NA                                     | 70.2 (62.9 to 76.5)   | 0.9 (0.2 to 5.1)    | 65.6 (56.8 to 73.4) | 46.8 (37.8 to 56.1)   |
| South Central Coast             |                                   | NA                                     | 69.9 (63.0 to 76.0)   | 51.8 (41.2 to 62.2) | 43.5 (33.5 to 54.1) | 37.8 (29.4 to 47.1)   |
| Central Highlands               |                                   | NA                                     | 51.5 (39.8 to 62.9)   | 26.2 (19.3 to 34.5) | 55.9 (49.9 to 61.7) | 46.1 (40.6 to 51.7)   |
| Southeast                       |                                   | NA                                     | 46.8 (38.8 to 55.0)   | 37.5 (28.5 to 47.5) | 41.4 (35.0 to 48.1) | 34.0 (28.4 to 40.2)   |
| Mekong River Delta              |                                   | NA                                     | 47.5 (41.8 to 53.3)   | 12.3 (7.3 to 19.9)  | 52.1 (45.0 to 59.2) | 43.3 (36.7 to 50.2)   |
| Family planning needs satisfied |                                   | Northwest                              | NA                    | 91.5 (86.2 to 94.8) | NA                  | 64.5 (60.0 to 68.8)   |
|                                 | Northeast                         | NA                                     | 63.6 (59.3 to 67.8)   | NA                  | 63.2 (59.8 to 66.4) | 61.5 (57.7 to 65.2)   |
|                                 | Red River Delta                   | NA                                     | 71.4 (68.6 to 74.0)   | NA                  | 63.2 (60.0 to 66.2) | 61.3 (57.9 to 64.5)   |
|                                 | North Central                     | NA                                     | 76.5 (72.8 to 79.8)   | NA                  | 68.6 (64.5 to 72.5) | 64.3 (59.5 to 68.8)   |
|                                 | South Central Coast               | NA                                     | 75.7 (71.4 to 79.6)   | NA                  | 68.1 (63.7 to 72.2) | 62.9 (58.1 to 67.4)   |
|                                 | Central Highlands                 | NA                                     | 61.7 (53.5 to 69.3)   | NA                  | 62.2 (59.3 to 65.1) | 60.9 (57.7 to 64.0)   |
|                                 | Southeast                         | NA                                     | 70.8 (66.6 to 74.7)   | NA                  | 63.8 (60.7 to 66.8) | 59.4 (56.1 to 62.5)   |
|                                 | Mekong River Delta                | NA                                     | 73.3 (70.3 to 76.2)   | NA                  | 68.0 (65.2 to 70.7) | 67.7 (64.5 to 70.6)   |
|                                 | BCG immunization                  | Northwest                              | 72.2 (62.2 to 80.4)   | 80.0 (60.9 to 91.1) | 43.6 (33.1 to 54.6) | 80.6 (69.1 to 88.6)   |
| Northeast                       |                                   | 78.8 (62.2 to 89.3)                    | 96.4 (87.9 to 99.0)   | 73.2 (58.1 to 84.3) | 88.9 (80.7 to 93.9) | 97.8 (92.3 to 99.4)   |
| Red River Delta                 |                                   | 94.5 (85.1 to 98.1)                    | 100.0 (95.6 to 100.0) | 89.0 (79.8 to 94.3) | 97.1 (91.9 to 99.0) | 97.5 (92.9 to 99.1)   |
| North Central                   |                                   | 91.7 (83.0 to 96.1)                    | 91.9 (83.4 to 96.2)   | 90.0 (78.6 to 95.7) | 97.1 (90.0 to 99.2) | 100.0 (93.9 to 100.0) |
| South Central Coast             |                                   | 89.4 (81.1 to 94.3)                    | 96.8 (89.1 to 99.1)   | 90.8 (81.3 to 95.7) | 97.9 (88.9 to 99.6) | 98.2 (90.6 to 99.7)   |
| Central Highlands               |                                   | 87.7 (80.1 to 92.7)                    | 87.0 (67.9 to 95.5)   | 90.8 (84.2 to 94.8) | 91.2 (85.8 to 94.7) | 92.3 (87.0 to 95.5)   |
| Southeast                       |                                   | 95.1 (83.9 to 98.7)                    | 92.5 (82.1 to 97.0)   | 93.2 (83.8 to 97.3) | 96.9 (92.4 to 98.8) | 97.0 (92.6 to 98.8)   |
| Mekong River Delta              |                                   | 83.9 (72.8 to 91.0)                    | 92.1 (84.6 to 96.1)   | 91.3 (82.3 to 96.0) | 93.8 (87.7 to 96.9) | 97.4 (92.7 to 99.1)   |
| DPT3 immunization               |                                   | Northwest                              | 25.6 (17.7 to 35.4)   | 56.0 (37.1 to 73.3) | 35.9 (26.1 to 47.0) | 32.3 (22.0 to 44.6)   |
|                                 | Northeast                         | 45.5 (29.8 to 62.0)                    | 58.9 (45.9 to 70.8)   | 56.1 (41.0 to 70.1) | 36.7 (27.4 to 47.0) | 67.8 (57.6 to 76.5)   |
|                                 | Red River Delta                   | 78.2 (65.6 to 87.1)                    | 86.9 (78.1 to 92.5)   | 74.0 (62.9 to 82.7) | 54.3 (44.8 to 63.5) | 88.3 (81.4 to 92.9)   |
|                                 | North Central                     | 44.4 (33.5 to 55.9)                    | 54.1 (42.8 to 64.9)   | 50.0 (36.6 to 63.4) | 42.0 (31.1 to 53.8) | 78.0 (65.9 to 86.6)   |
|                                 | South Central Coast               | 62.4 (51.7 to 71.9)                    | 77.8 (66.1 to 86.3)   | 72.3 (60.4 to 81.7) | 66.0 (51.7 to 77.8) | 85.7 (74.3 to 92.6)   |
|                                 | Central Highlands                 | 38.7 (30.0 to 48.2)                    | 91.3 (73.2 to 97.6)   | 59.7 (50.7 to 68.0) | 44.0 (36.5 to 51.8) | 67.9 (60.3 to 74.8)   |
|                                 | Southeast                         | 63.4 (48.1 to 76.4)                    | 86.8 (75.2 to 93.5)   | 86.4 (75.5 to 93.0) | 71.8 (63.5 to 78.8) | 80.7 (73.3 to 86.5)   |
|                                 | Mekong River Delta                | 64.5 (52.1 to 75.3)                    | 70.8 (60.6 to 79.2)   | 73.9 (62.5 to 82.8) | 55.4 (46.1 to 64.2) | 81.9 (73.9 to 87.8)   |
|                                 | Polio3 immunization               | Northwest                              | 25.6 (17.7 to 35.4)   | 60.0 (40.7 to 76.6) | 34.6 (25.0 to 45.7) | 32.3 (22.0 to 44.6)   |
| Northeast                       |                                   | 33.3 (19.8 to 50.4)                    | 58.9 (45.9 to 70.8)   | 41.5 (27.8 to 56.6) | 37.8 (28.5 to 48.1) | 87.8 (79.4 to 93.0)   |
| Red River Delta                 |                                   | 67.3 (54.1 to 78.2)                    | 91.7 (83.8 to 95.9)   | 64.4 (52.9 to 74.4) | 33.3 (25.0 to 42.8) | 95.8 (90.6 to 98.2)   |
| North Central                   |                                   | 43.1 (32.3 to 54.6)                    | 58.1 (46.7 to 68.7)   | 50.0 (36.6 to 63.4) | 37.7 (27.2 to 49.5) | 86.4 (75.5 to 93.0)   |
| South Central Coast             |                                   | 68.2 (57.7 to 77.2)                    | 81.0 (69.6 to 88.8)   | 72.3 (60.4 to 81.7) | 59.6 (45.3 to 72.4) | 92.9 (83.0 to 97.2)   |
| Southeast                       |                                   | 42.5 (33.5 to 52.0)                    | 95.7 (79.0 to 99.2)   | 57.1 (48.2 to 65.7) | 44.0 (36.5 to 51.8) | 76.9 (69.7 to 82.8)   |
|                                 |                                   | 68.3 (53.0 to 80.4)                    | 84.9 (72.9 to 92.1)   | 81.4 (69.6 to 89.3) | 63.4 (54.8 to 71.1) | 85.2 (78.2 to 90.2)   |

|                            |                     |                     |                       |                       |                       |                       |
|----------------------------|---------------------|---------------------|-----------------------|-----------------------|-----------------------|-----------------------|
|                            | Mekong River Delta  | 66.1 (53.7 to 76.7) | 71.9 (61.8 to 80.2)   | 78.3 (67.2 to 86.4)   | 45.5 (36.6 to 54.8)   | 87.1 (79.8 to 92.0)   |
|                            | Northwest           | 57.8 (47.5 to 67.5) | 64.0 (44.5 to 79.8)   | 33.3 (23.9 to 44.4)   | 45.2 (33.4 to 57.5)   | 66.0 (52.6 to 77.3)   |
|                            | Northeast           | 66.7 (49.6 to 80.2) | 92.9 (83.0 to 97.2)   | 61.0 (45.7 to 74.3)   | 64.4 (54.2 to 73.6)   | 86.7 (78.1 to 92.2)   |
| Measles immunization       | Red River Delta     | 87.3 (76.0 to 93.7) | 97.6 (91.7 to 99.3)   | 82.2 (71.9 to 89.3)   | 77.1 (68.2 to 84.1)   | 93.3 (87.4 to 96.6)   |
|                            | North Central       | 80.6 (70.0 to 88.0) | 81.1 (70.7 to 88.4)   | 86.0 (73.8 to 93.0)   | 65.2 (53.4 to 75.4)   | 89.8 (79.5 to 95.3)   |
|                            | South Central Coast | 78.8 (69.0 to 86.2) | 90.5 (80.7 to 95.6)   | 80.0 (68.7 to 87.9)   | 76.6 (62.8 to 86.4)   | 89.3 (78.5 to 95.0)   |
|                            | Central Highlands   | 57.5 (48.0 to 66.5) | 87.0 (67.9 to 95.5)   | 75.6 (67.2 to 82.5)   | 68.6 (61.0 to 75.3)   | 71.2 (63.6 to 77.7)   |
|                            | Southeast           | 73.2 (58.1 to 84.3) | 86.8 (75.2 to 93.5)   | 84.7 (73.5 to 91.8)   | 87.8 (81.1 to 92.3)   | 80.0 (72.5 to 85.9)   |
|                            | Mekong River Delta  | 61.3 (48.8 to 72.4) | 65.2 (54.8 to 74.3)   | 78.3 (67.2 to 86.4)   | 67.0 (57.8 to 75.0)   | 82.8 (74.9 to 88.6)   |
|                            | Northwest           | 12.2 (7.0 to 20.6)  | 48.0 (30.0 to 66.5)   | 24.4 (16.2 to 34.9)   | 25.8 (16.6 to 37.9)   | 41.5 (29.3 to 54.9)   |
|                            | Northeast           | 30.3 (17.4 to 47.3) | 51.8 (39.0 to 64.3)   | 36.6 (23.6 to 51.9)   | 30.0 (21.5 to 40.1)   | 57.8 (47.5 to 67.5)   |
| Full immunization          | Red River Delta     | 54.5 (41.5 to 67.0) | 84.5 (75.3 to 90.7)   | 54.8 (43.4 to 65.7)   | 28.6 (20.8 to 37.8)   | 80.8 (72.9 to 86.9)   |
|                            | North Central       | 30.6 (21.1 to 42.0) | 51.4 (40.2 to 62.4)   | 38.0 (25.9 to 51.8)   | 29.0 (19.6 to 40.6)   | 76.3 (64.0 to 85.3)   |
|                            | South Central Coast | 51.8 (41.3 to 62.1) | 76.2 (64.4 to 85.0)   | 60.0 (47.9 to 71.0)   | 48.9 (35.3 to 62.8)   | 82.1 (70.2 to 90.0)   |
|                            | Central Highlands   | 24.5 (17.3 to 33.5) | 78.3 (58.1 to 90.3)   | 47.9 (39.1 to 56.8)   | 38.4 (31.2 to 46.1)   | 58.3 (50.5 to 65.8)   |
|                            | Southeast           | 53.7 (38.7 to 67.9) | 81.1 (68.6 to 89.4)   | 64.4 (51.7 to 75.4)   | 58.0 (49.5 to 66.1)   | 70.4 (62.2 to 77.4)   |
|                            | Mekong River Delta  | 41.9 (30.5 to 54.3) | 59.6 (49.2 to 69.1)   | 62.3 (50.5 to 72.8)   | 33.9 (25.8 to 43.1)   | 69.0 (60.1 to 76.7)   |
|                            | Northwest           | 42.0 (40.6 to 43.4) | 97.6 (96.6 to 98.3)   | 71.2 (69.9 to 72.4)   | 64.6 (62.8 to 66.3)   | 92.5 (91.4 to 93.5)   |
|                            | Northeast           | 67.7 (65.9 to 69.4) | 95.2 (94.4 to 95.9)   | 79.0 (77.5 to 80.4)   | 90.1 (89.3 to 90.9)   | 90.6 (89.7 to 91.4)   |
| Improved Water             | Red River Delta     | 65.1 (63.7 to 66.4) | 99.2 (99.0 to 99.4)   | 57.0 (55.6 to 58.3)   | 98.8 (98.5 to 99.1)   | 99.4 (99.2 to 99.6)   |
|                            | North Central       | 80.4 (79.2 to 81.5) | 97.7 (97.2 to 98.1)   | 79.6 (78.3 to 80.7)   | 88.8 (87.7 to 89.8)   | 86.1 (84.9 to 87.3)   |
|                            | South Central Coast | 90.3 (89.5 to 91.1) | 93.5 (92.6 to 94.3)   | 89.5 (88.7 to 90.3)   | 93.2 (92.4 to 94.0)   | 91.4 (90.4 to 92.3)   |
|                            | Central Highlands   | 77.6 (76.4 to 78.7) | 91.4 (89.7 to 92.8)   | 83.7 (82.7 to 84.7)   | 86.9 (86.1 to 87.6)   | 85.0 (84.2 to 85.8)   |
|                            | Southeast           | 88.7 (87.6 to 89.7) | 98.3 (97.9 to 98.7)   | 90.8 (89.8 to 91.7)   | 98.3 (98.0 to 98.6)   | 97.5 (97.1 to 97.9)   |
|                            | Mekong River Delta  | 43.3 (41.9 to 44.7) | 61.3 (60.2 to 62.4)   | 51.7 (50.2 to 53.1)   | 94.0 (93.5 to 94.5)   | 90.0 (89.3 to 90.7)   |
|                            | Northwest           | 17.4 (16.3 to 18.4) | 58.1 (55.5 to 60.7)   | 31.9 (30.6 to 33.2)   | 64.2 (62.4 to 65.9)   | 52.6 (50.6 to 54.5)   |
|                            | Northeast           | 38.1 (36.2 to 39.9) | 94.8 (94.0 to 95.5)   | 66.7 (65.0 to 68.4)   | 82.9 (81.8 to 83.9)   | 86.9 (85.9 to 87.9)   |
| Adequate sanitation        | Red River Delta     | 72.4 (71.1 to 73.6) | 98.6 (98.3 to 98.9)   | 87.3 (86.4 to 88.2)   | 97.6 (97.2 to 97.9)   | 98.0 (97.7 to 98.4)   |
|                            | North Central       | 46.6 (45.2 to 48.1) | 83.1 (81.9 to 84.1)   | 68.8 (67.4 to 70.1)   | 82.5 (81.2 to 83.6)   | 90.3 (89.2 to 91.3)   |
|                            | South Central Coast | 40.6 (39.3 to 41.9) | 65.5 (63.8 to 67.1)   | 63.3 (62.0 to 64.6)   | 86.0 (84.8 to 87.1)   | 86.7 (85.5 to 87.9)   |
|                            | Central Highlands   | 27.3 (26.1 to 28.6) | 74.2 (71.7 to 76.5)   | 51.4 (50.1 to 52.8)   | 69.7 (68.7 to 70.7)   | 71.5 (70.4 to 72.5)   |
|                            | Southeast           | 60.6 (59.0 to 62.3) | 87.5 (86.5 to 88.5)   | 83.7 (82.4 to 84.9)   | 91.2 (90.6 to 91.9)   | 93.4 (92.8 to 94.0)   |
|                            | Mekong River Delta  | 18.9 (17.8 to 20.0) | 69.7 (68.6 to 70.8)   | 34.7 (33.3 to 36.1)   | 50.1 (49.0 to 51.3)   | 58.7 (57.5 to 59.9)   |
|                            | Northwest           | NA                  | 8.3 (3.9 to 17.0)     | 45.7 (38.2 to 53.4)   | 57.5 (48.6 to 66.0)   | 54.8 (45.7 to 63.6)   |
|                            | Northeast           | NA                  | 70.1 (61.9 to 77.2)   | 62.7 (51.4 to 72.7)   | 87.6 (81.8 to 91.7)   | 93.6 (88.8 to 96.4)   |
| Institutional delivery     | Red River Delta     | NA                  | 96.1 (93.0 to 97.9)   | 99.2 (95.8 to 99.9)   | 99.0 (96.3 to 99.7)   | 99.1 (96.8 to 99.8)   |
|                            | North Central       | NA                  | 73.2 (66.1 to 79.3)   | 72.0 (62.8 to 79.6)   | 92.6 (86.6 to 96.1)   | 97.3 (92.4 to 99.1)   |
|                            | South Central Coast | NA                  | 73.4 (66.6 to 79.2)   | 91.3 (85.0 to 95.1)   | 97.6 (91.8 to 99.4)   | 98.2 (93.7 to 99.5)   |
|                            | Central Highlands   | NA                  | 70.1 (58.3 to 79.8)   | 56.4 (49.2 to 63.3)   | 80.1 (75.0 to 84.5)   | 82.5 (77.8 to 86.3)   |
|                            | Southeast           | NA                  | 95.7 (91.0 to 98.0)   | 100.0 (96.4 to 100.0) | 99.1 (96.7 to 99.7)   | 97.1 (94.2 to 98.6)   |
|                            | Mekong River Delta  | NA                  | 89.6 (85.4 to 92.6)   | 97.0 (92.5 to 98.8)   | 98.4 (95.4 to 99.5)   | 99.5 (97.3 to 99.9)   |
|                            | Northwest           | 25.6 (17.4 to 36.0) | 11.1 (5.7 to 20.4)    | 42.0 (34.6 to 49.7)   | 60.0 (51.1 to 68.3)   | 60.0 (50.9 to 68.5)   |
|                            | Northeast           | 29.8 (18.7 to 44.0) | 85.8 (78.9 to 90.7)   | 61.3 (50.0 to 71.5)   | 87.0 (81.1 to 91.2)   | 94.2 (89.6 to 96.8)   |
|                            | Red River Delta     | 86.7 (77.2 to 92.6) | 100.0 (98.5 to 100.0) | 86.2 (79.2 to 91.1)   | 99.5 (97.1 to 99.9)   | 99.1 (96.8 to 99.8)   |
| Skilled birth attendance   | North Central       | 53.6 (40.7 to 66.0) | 81.0 (74.3 to 86.2)   | 63.6 (54.1 to 72.1)   | 95.1 (89.7 to 97.7)   | 99.1 (95.1 to 99.8)   |
|                            | South Central Coast | 70.9 (60.1 to 79.7) | 87.0 (81.3 to 91.1)   | 67.5 (58.9 to 75.0)   | 98.8 (93.6 to 99.8)   | 98.2 (93.7 to 99.5)   |
|                            | Central Highlands   | 51.5 (41.7 to 61.2) | 86.6 (76.4 to 92.8)   | 56.9 (49.8 to 63.8)   | 80.9 (75.8 to 85.1)   | 84.1 (79.6 to 87.8)   |
|                            | Southeast           | 93.2 (81.8 to 97.7) | 99.3 (96.1 to 99.9)   | 81.4 (72.7 to 87.7)   | 99.1 (96.7 to 99.7)   | 98.0 (95.3 to 99.1)   |
|                            | Mekong River Delta  | 85.7 (75.7 to 92.1) | 86.7 (82.2 to 90.2)   | 84.2 (77.1 to 89.4)   | 98.4 (95.4 to 99.5)   | 99.5 (97.3 to 99.9)   |
|                            | Northwest           | 63.4 (48.1 to 76.4) | 73.7 (51.2 to 88.2)   | 69.0 (50.8 to 82.7)   | 66.7 (30.0 to 90.3)   | 16.7 (3.0 to 56.4)    |
|                            | Northeast           | 50.0 (32.1 to 67.9) | 73.5 (56.9 to 85.4)   | 81.8 (52.3 to 94.9)   | 85.7 (48.7 to 97.4)   | 75.0 (46.8 to 91.1)   |
|                            | Red River Delta     | 51.4 (35.9 to 66.6) | 88.7 (77.4 to 94.7)   | 85.7 (70.6 to 93.7)   | 59.3 (40.7 to 75.5)   | 100.0 (72.2 to 100.0) |
| Care seeking for pneumonia | North Central       | 83.3 (71.3 to 91.0) | 90.3 (75.1 to 96.7)   | 53.1 (36.4 to 69.1)   | 70.6 (46.9 to 86.7)   | 94.1 (73.0 to 99.0)   |
|                            | South Central Coast | 72.4 (59.8 to 82.2) | 86.1 (71.3 to 93.9)   | 78.9 (56.7 to 91.5)   | 91.7 (64.6 to 98.5)   | 80.0 (49.0 to 94.3)   |
|                            | Central Highlands   | 64.0 (50.1 to 75.9) | 73.3 (48.0 to 89.1)   | 80.5 (66.0 to 89.8)   | 75.8 (59.0 to 87.2)   | 87.5 (71.9 to 95.0)   |
|                            | Southeast           | 25.0 (12.7 to 43.4) | 88.9 (67.2 to 96.9)   | 90.0 (59.6 to 98.2)   | 89.5 (68.6 to 97.1)   | 100.0 (78.5 to 100.0) |
|                            | Mekong River Delta  | 62.5 (45.3 to 77.1) | 91.8 (80.8 to 96.8)   | 70.0 (48.1 to 85.5)   | 100.0 (75.8 to 100.0) | 92.3 (75.9 to 97.9)   |
|                            | Northwest           | NA                  | NA                    | 55.2 (37.5 to 71.6)   | 83.3 (43.6 to 97.0)   | 33.3 (9.7 to 70.0)    |
|                            | Northeast           | NA                  | NA                    | 72.7 (43.4 to 90.3)   | 71.4 (35.9 to 91.8)   | 66.7 (39.1 to 86.2)   |
| ARI treatment              | Red River Delta     | NA                  | NA                    | 54.3 (38.2 to 69.5)   | 74.1 (55.3 to 86.8)   | 90.0 (59.6 to 98.2)   |
|                            | North Central       | NA                  | NA                    | 43.8 (28.2 to 60.7)   | 41.2 (21.6 to 64.0)   | 88.2 (65.7 to 96.7)   |
|                            | South Central Coast | NA                  | NA                    | 73.7 (51.2 to 88.2)   | 75.0 (46.8 to 91.1)   | 70.0 (39.7 to 89.2)   |
|                            | Central Highlands   | NA                  | NA                    | 51.2 (36.5 to 65.7)   | 60.6 (43.7 to 75.3)   | 87.5 (71.9 to 95.0)   |
|                            | Southeast           | NA                  | NA                    | 20.0 (5.7 to 51.0)    | 78.9 (56.7 to 91.5)   | 100.0 (78.5 to 100.0) |

|                                |                     |                     |                     |                     |                     |                     |
|--------------------------------|---------------------|---------------------|---------------------|---------------------|---------------------|---------------------|
|                                | Mekong River Delta  | NA                  | NA                  | 25.0 (11.2 to 46.9) | 33.3 (13.8 to 60.9) | 84.6 (66.5 to 93.8) |
|                                | Northwest           | 66.7 (52.5 to 78.3) | 44.4 (18.9 to 73.3) | 82.1 (67.3 to 91.0) | 13.2 (5.8 to 27.3)  | 41.2 (26.4 to 57.8) |
|                                | Northeast           | 51.2 (36.5 to 65.7) | 30.0 (14.5 to 51.9) | 54.5 (28.0 to 78.7) | 41.5 (27.8 to 56.6) | 37.5 (26.0 to 50.6) |
|                                | Red River Delta     | 69.2 (50.0 to 83.5) | 40.0 (21.9 to 61.3) | 57.1 (39.1 to 73.5) | 36.6 (23.6 to 51.9) | 36.7 (21.9 to 54.5) |
| Oral<br>rehydration<br>therapy | North Central       | 47.9 (34.5 to 61.7) | 23.1 (8.2 to 50.3)  | 70.6 (46.9 to 86.7) | 31.6 (15.4 to 54.0) | 23.5 (9.6 to 47.3)  |
|                                | South Central Coast | 41.1 (29.2 to 54.1) | 47.1 (31.5 to 63.3) | 59.1 (38.7 to 76.7) | 5.9 (1.0 to 27.0)   | 20.0 (8.1 to 41.6)  |
|                                | Central Highlands   | 55.6 (44.7 to 65.9) | 44.4 (18.9 to 73.3) | 58.7 (44.3 to 71.7) | 31.8 (20.0 to 46.6) | 31.3 (22.4 to 41.9) |
|                                | Southeast           | 66.7 (41.7 to 84.8) | 12.5 (2.2 to 47.1)  | 81.2 (57.0 to 93.4) | 32.3 (18.6 to 49.9) | 25.0 (13.8 to 41.1) |
|                                | Mekong River Delta  | 51.3 (36.2 to 66.1) | 48.0 (30.0 to 66.5) | 57.9 (36.3 to 76.9) | 26.5 (14.6 to 43.1) | 11.8 (4.7 to 26.6)  |

**Table S14: Predicted coverage of RMNCH service in Vietnam by regional levels, 2015–2020**

| Indicators                      | Regions                           | Predicted coverage in percent (95% CrI) |                      |                       | Probability reach target (%) |
|---------------------------------|-----------------------------------|-----------------------------------------|----------------------|-----------------------|------------------------------|
|                                 |                                   | Year 2015                               | Year 2020            | Year 2030             |                              |
| At least one ANC visit          | Northwest                         | 74.1 (67.5 to 80.1)                     | 81.1 (72.9 to 87.6)  | 90.7 (81.4 to 95.7)   | 98.6                         |
|                                 | Northeast                         | 94.3 (91.2 to 96.5)                     | 96.5 (93.2 to 98.3)  | 98.7 (95.9 to 99.6)   | 100.0                        |
|                                 | Red River Delta                   | 99.6 (98.8 to 99.9)                     | 99.8 (99.2 to 100.0) | 100.0 (99.7 to 100.0) | 100.0                        |
|                                 | North Central                     | 99.5 (98.6 to 99.9)                     | 99.9 (99.4 to 100.0) | 100.0 (99.9 to 100.0) | 100.0                        |
|                                 | South Central Coast               | 97.8 (95.6 to 99.0)                     | 99.0 (97.3 to 99.7)  | 99.8 (99.1 to 100.0)  | 100.0                        |
|                                 | Central Highlands                 | 93.6 (91.4 to 95.4)                     | 96.9 (95.2 to 98.1)  | 99.3 (98.5 to 99.7)   | 100.0                        |
|                                 | Southeast                         | 99.6 (99.0 to 99.9)                     | 99.9 (99.5 to 100.0) | 100.0 (99.9 to 100.0) | 100.0                        |
|                                 | Mekong River Delta                | 97.8 (88.5 to 99.5)                     | 99.0 (92.6 to 99.9)  | 99.8 (97.0 to 100.0)  | 99.7                         |
|                                 | At least four ANC visit           | Northwest                               | 40.9 (33.5 to 48.6)  | 59.3 (46.3 to 70.6)   | 86.7 (70.2 to 94.5)          |
| Northeast                       |                                   | 67.2 (61.3 to 72.6)                     | 81.5 (74.4 to 86.3)  | 95.3 (90.4 to 97.4)   | 100.0                        |
| Red River Delta                 |                                   | 88.2 (84.8 to 91.1)                     | 94.6 (91.9 to 96.4)  | 99.0 (97.9 to 99.5)   | 100.0                        |
| North Central                   |                                   | 73.8 (67.7 to 79.0)                     | 86.4 (80.5 to 90.5)  | 97.0 (93.9 to 98.5)   | 100.0                        |
| South Central Coast             |                                   | 71.1 (64.3 to 77.2)                     | 85.2 (78.8 to 90.3)  | 96.9 (93.9 to 98.6)   | 100.0                        |
| Central Highlands               |                                   | 54.6 (49.2 to 59.5)                     | 70.4 (61.0 to 77.1)  | 90.3 (79.4 to 94.9)   | 97.0                         |
| Southeast                       |                                   | 92.0 (89.2 to 94.4)                     | 96.9 (95.0 to 98.2)  | 99.6 (99.0 to 99.8)   | 100.0                        |
| Mekong River Delta              |                                   | 73.3 (53.8 to 86.3)                     | 86.2 (70.4 to 94.0)  | 97.0 (90.5 to 99.0)   | 99.8                         |
| Exclusive breastfeeding         |                                   | Northwest                               | 37.5 (29.2 to 46.6)  | 41.0 (30.7 to 52.3)   | 48.4 (32.6 to 64.5)          |
|                                 | Northeast                         | 29.0 (21.8 to 37.1)                     | 32.1 (23.2 to 42.1)  | 38.9 (25.2 to 54.4)   | 0.0                          |
|                                 | Red River Delta                   | 22.8 (17.1 to 29.9)                     | 25.4 (18.2 to 34.7)  | 31.3 (19.5 to 46.5)   | 0.0                          |
|                                 | North Central                     | 28.9 (21.0 to 37.9)                     | 32.0 (22.4 to 43.4)  | 38.8 (24.1 to 54.7)   | 0.0                          |
|                                 | South Central Coast               | 8.6 (4.6 to 14.8)                       | 9.8 (5.1 to 17.8)    | 12.7 (5.9 to 25.7)    | 0.0                          |
|                                 | Central Highlands                 | 15.4 (10.7 to 21.0)                     | 17.4 (11.5 to 24.7)  | 22.0 (12.9 to 34.6)   | 0.0                          |
|                                 | Southeast                         | 6.4 (3.2 to 10.9)                       | 7.3 (3.6 to 12.8)    | 9.5 (4.3 to 18.7)     | 0.0                          |
|                                 | Mekong River Delta                | 18.0 (9.9 to 33.2)                      | 20.3 (11.0 to 37.6)  | 25.5 (12.6 to 47.9)   | 0.0                          |
|                                 | Early initiation of breastfeeding | Northwest                               | 50.8 (45.3 to 56.2)  | 47.2 (41.3 to 53.3)   | 40.3 (32.8 to 48.0)          |
| Northeast                       |                                   | 50.3 (45.9 to 54.8)                     | 46.8 (41.5 to 51.9)  | 39.8 (33.1 to 47.1)   | 0.0                          |
| Red River Delta                 |                                   | 39.3 (35.6 to 43.1)                     | 36.0 (31.6 to 40.5)  | 29.7 (24.0 to 36.0)   | 0.0                          |
| North Central                   |                                   | 44.2 (39.6 to 48.9)                     | 40.7 (35.4 to 46.1)  | 34.1 (27.4 to 41.3)   | 0.0                          |
| South Central Coast             |                                   | 48.2 (43.3 to 53.0)                     | 44.6 (39.0 to 50.3)  | 37.8 (30.5 to 45.4)   | 0.0                          |
| Central Highlands               |                                   | 43.6 (40.0 to 47.4)                     | 40.2 (35.9 to 44.6)  | 33.6 (27.8 to 40.0)   | 0.0                          |
| Southeast                       |                                   | 36.4 (32.6 to 40.2)                     | 33.1 (28.8 to 37.6)  | 27.2 (21.8 to 33.2)   | 0.0                          |
| Mekong River Delta              |                                   | 43.7 (37.6 to 50.2)                     | 40.3 (33.9 to 47.4)  | 33.7 (26.5 to 41.8)   | 0.0                          |
| Family planning needs satisfied |                                   | Northwest                               | 59.0 (53.8 to 63.4)  | 45.8 (36.2 to 54.8)   | 22.7 (11.4 to 38.6)          |
|                                 | Northeast                         | 61.8 (58.7 to 64.6)                     | 60.7 (55.6 to 65.4)  | 58.4 (48.9 to 67.4)   | 0.0                          |
|                                 | Red River Delta                   | 60.2 (57.4 to 62.8)                     | 55.6 (51.1 to 59.7)  | 46.0 (38.3 to 53.8)   | 0.0                          |
|                                 | North Central                     | 63.1 (59.7 to 66.8)                     | 57.2 (51.4 to 63.1)  | 44.8 (34.8 to 55.7)   | 0.0                          |
|                                 | South Central Coast               | 62.3 (58.7 to 66.0)                     | 56.4 (50.2 to 62.3)  | 44.1 (33.3 to 55.6)   | 0.0                          |
|                                 | Central Highlands                 | 60.9 (58.1 to 63.9)                     | 59.6 (53.9 to 65.3)  | 56.7 (44.4 to 68.7)   | 0.0                          |
|                                 | Southeast                         | 59.5 (56.6 to 62.2)                     | 54.6 (49.7 to 59.2)  | 44.6 (35.4 to 53.8)   | 0.0                          |
|                                 | Mekong River Delta                | 61.6 (57.4 to 65.0)                     | 56.6 (49.7 to 62.1)  | 46.4 (32.8 to 58.3)   | 0.0                          |
|                                 | BCG immunization                  | Northwest                               | 79.8 (74.2 to 84.8)  | 84.2 (77.8 to 89.1)   | 90.6 (83.6 to 94.8)          |
| Northeast                       |                                   | 93.2 (90.3 to 95.5)                     | 94.9 (92.1 to 96.9)  | 97.1 (94.6 to 98.5)   | 100.0                        |
| Red River Delta                 |                                   | 97.4 (96.0 to 98.4)                     | 98.1 (96.8 to 98.9)  | 98.9 (97.9 to 99.5)   | 100.0                        |
| North Central                   |                                   | 96.5 (94.5 to 97.9)                     | 97.4 (95.6 to 98.5)  | 98.6 (97.1 to 99.3)   | 100.0                        |
| South Central Coast             |                                   | 96.5 (94.5 to 97.9)                     | 97.4 (95.5 to 98.6)  | 98.6 (97.0 to 99.3)   | 100.0                        |
| Central Highlands               |                                   | 93.8 (91.5 to 95.5)                     | 95.3 (93.1 to 96.9)  | 97.4 (95.2 to 98.6)   | 100.0                        |
| Southeast                       |                                   | 97.0 (95.3 to 98.2)                     | 97.7 (96.3 to 98.7)  | 98.7 (97.6 to 99.4)   | 100.0                        |
| Mekong River Delta              |                                   | 94.7 (89.4 to 97.4)                     | 96.0 (91.5 to 98.1)  | 97.8 (94.7 to 99.1)   | 100.0                        |
| DPT3 immunization               |                                   | Northwest                               | 41.5 (35.4 to 48.0)  | 44.6 (37.5 to 52.2)   | 50.9 (40.9 to 61.1)          |
|                                 | Northeast                         | 57.8 (51.6 to 63.4)                     | 60.9 (53.9 to 67.1)  | 66.6 (57.6 to 74.4)   | 0.1                          |
|                                 | Red River Delta                   | 79.1 (75.0 to 82.8)                     | 81.1 (76.6 to 85.0)  | 84.7 (79.1 to 89.1)   | 95.2                         |
|                                 | North Central                     | 58.8 (52.5 to 64.8)                     | 61.9 (54.7 to 68.6)  | 67.6 (58.1 to 75.9)   | 0.1                          |
|                                 | South Central Coast               | 76.4 (71.2 to 81.2)                     | 78.6 (72.9 to 83.6)  | 82.5 (75.9 to 87.9)   | 77.5                         |
|                                 | Central Highlands                 | 59.1 (54.5 to 63.6)                     | 62.1 (56.5 to 67.5)  | 67.8 (60.0 to 75.0)   | 0.0                          |
|                                 | Southeast                         | 80.1 (76.0 to 83.7)                     | 82.0 (77.7 to 85.8)  | 85.4 (80.3 to 89.6)   | 97.9                         |
|                                 | Mekong River Delta                | 66.8 (52.4 to 78.0)                     | 69.5 (55.5 to 80.3)  | 74.6 (60.4 to 85.0)   | 15.5                         |
|                                 | Polio3 immunization               | Northwest                               | 45.7 (39.3 to 52.0)  | 50.4 (42.9 to 57.6)   | 59.6 (49.6 to 68.7)          |
| Northeast                       |                                   | 62.4 (56.7 to 67.8)                     | 66.7 (60.4 to 72.6)  | 74.5 (66.8 to 80.9)   | 5.1                          |
| Red River Delta                 |                                   | 76.3 (71.9 to 80.3)                     | 79.5 (74.8 to 83.7)  | 85.0 (79.5 to 89.4)   | 96.2                         |
| North Central                   |                                   | 62.4 (56.3 to 68.3)                     | 66.8 (59.9 to 73.1)  | 74.5 (66.0 to 81.6)   | 6.9                          |
| South Central Coast             |                                   | 80.4 (75.7 to 84.7)                     | 83.2 (78.4 to 87.5)  | 87.9 (82.7 to 91.9)   | 99.6                         |
| Central Highlands               |                                   | 63.8 (59.3 to 68.2)                     | 68.0 (62.7 to 73.1)  | 75.6 (68.6 to 81.7)   | 8.9                          |
| Southeast                       |                                   | 79.8 (75.7 to 83.6)                     | 82.7 (78.4 to 86.4)  | 87.4 (82.7 to 91.1)   | 99.8                         |
| Mekong River Delta              |                                   | 68.9 (56.4 to 78.6)                     | 72.8 (60.3 to 81.9)  | 79.5 (67.7 to 87.5)   | 45.6                         |
| Northwest                       |                                   | 54.8 (48.2 to 61.0)                     | 56.5 (48.6 to 63.7)  | 59.8 (48.9 to 69.7)   | 0.0                          |

| Indicators                 | Regions             | Predicted coverage in percent (95% CrI) |                     |                      | Probability reach target (%) |
|----------------------------|---------------------|-----------------------------------------|---------------------|----------------------|------------------------------|
|                            |                     | Year 2015                               | Year 2020           | Year 2030            |                              |
| Measles immunization       | Northeast           | 77.5 (72.3 to 82.0)                     | 78.7 (73.0 to 83.5) | 80.9 (73.4 to 86.7)  | 59.7                         |
|                            | Red River Delta     | 88.3 (84.9 to 91.2)                     | 89.0 (85.2 to 92.1) | 90.2 (85.5 to 93.7)  | 100.0                        |
|                            | North Central       | 81.6 (77.0 to 86.0)                     | 82.7 (77.5 to 87.2) | 84.5 (77.8 to 89.7)  | 91.0                         |
|                            | South Central Coast | 84.4 (79.8 to 88.4)                     | 85.3 (80.2 to 89.3) | 86.9 (80.4 to 91.5)  | 98.1                         |
|                            | Central Highlands   | 71.6 (67.2 to 75.7)                     | 72.9 (67.7 to 77.8) | 75.5 (67.7 to 82.1)  | 8.9                          |
|                            | Southeast           | 84.3 (80.3 to 87.6)                     | 85.1 (80.9 to 88.7) | 86.8 (81.2 to 91.0)  | 99.0                         |
|                            | Mekong River Delta  | 78.1 (67.3 to 85.9)                     | 79.2 (68.3 to 86.9) | 81.3 (69.5 to 89.2)  | 60.2                         |
| Full immunization          | Northwest           | 32.4 (26.6 to 38.4)                     | 35.8 (29.1 to 42.9) | 43.2 (33.4 to 53.1)  | 0.0                          |
|                            | Northeast           | 48.2 (42.3 to 54.1)                     | 52.1 (45.3 to 58.8) | 59.6 (50.6 to 68.2)  | 0.0                          |
|                            | Red River Delta     | 66.2 (61.2 to 70.9)                     | 69.6 (63.8 to 74.8) | 75.7 (68.2 to 81.8)  | 8.9                          |
|                            | North Central       | 51.3 (44.9 to 57.4)                     | 55.1 (47.8 to 62.3) | 62.5 (53.0 to 71.3)  | 0.0                          |
|                            | South Central Coast | 69.2 (63.4 to 74.5)                     | 72.3 (65.8 to 78.1) | 78.1 (70.2 to 84.3)  | 30.3                         |
|                            | Central Highlands   | 50.1 (45.4 to 54.7)                     | 54.0 (48.2 to 59.5) | 61.4 (53.1 to 69.0)  | 0.0                          |
|                            | Southeast           | 69.1 (64.4 to 73.6)                     | 72.3 (67.1 to 77.3) | 78.0 (71.2 to 83.8)  | 25.8                         |
| Improved Water             | Mekong River Delta  | 55.9 (43.8 to 67.8)                     | 59.6 (47.1 to 71.5) | 66.9 (53.2 to 78.5)  | 1.2                          |
|                            | Northwest           | 86.1 (85.1 to 87.0)                     | 91.8 (90.9 to 92.6) | 97.3 (96.8 to 97.7)  | 100.0                        |
|                            | Northeast           | 91.7 (91.1 to 92.3)                     | 94.1 (93.4 to 94.8) | 97.1 (96.5 to 97.6)  | 100.0                        |
|                            | Red River Delta     | 96.3 (96.0 to 96.7)                     | 98.3 (98.0 to 98.5) | 99.6 (99.5 to 99.7)  | 100.0                        |
|                            | North Central       | 86.4 (85.4 to 87.4)                     | 86.4 (85.0 to 87.7) | 86.3 (83.8 to 88.4)  | 100.0                        |
|                            | South Central Coast | 92.0 (91.2 to 92.7)                     | 92.3 (91.3 to 93.3) | 93.0 (91.4 to 94.4)  | 100.0                        |
|                            | Central Highlands   | 87.0 (86.4 to 87.6)                     | 88.8 (87.9 to 89.6) | 91.6 (90.5 to 92.6)  | 100.0                        |
| Adequate sanitation        | Southeast           | 98.1 (97.8 to 98.3)                     | 98.8 (98.6 to 99.0) | 99.6 (99.4 to 99.7)  | 100.0                        |
|                            | Mekong River Delta  | 92.3 (83.3 to 96.7)                     | 94.8 (86.3 to 98.2) | 97.7 (89.1 to 99.6)  | 99.3                         |
|                            | Northwest           | 63.8 (62.3 to 65.3)                     | 76.1 (74.3 to 77.8) | 91.2 (89.9 to 92.4)  | 100.0                        |
|                            | Northeast           | 88.3 (87.5 to 89.0)                     | 92.6 (91.9 to 93.3) | 97.2 (96.8 to 97.6)  | 100.0                        |
|                            | Red River Delta     | 98.5 (98.3 to 98.7)                     | 99.4 (99.2 to 99.5) | 99.9 (99.9 to 99.9)  | 100.0                        |
|                            | North Central       | 89.8 (89.0 to 90.4)                     | 94.1 (93.4 to 94.7) | 98.2 (97.8 to 98.4)  | 100.0                        |
|                            | South Central Coast | 89.9 (89.1 to 90.5)                     | 95.1 (94.6 to 95.6) | 99.0 (98.8 to 99.1)  | 100.0                        |
| Institutional delivery     | Central Highlands   | 76.6 (75.9 to 77.4)                     | 85.7 (84.9 to 86.5) | 95.3 (94.7 to 95.7)  | 100.0                        |
|                            | Southeast           | 94.7 (94.3 to 95.1)                     | 97.2 (96.9 to 97.5) | 99.2 (99.1 to 99.4)  | 100.0                        |
|                            | Mekong River Delta  | 86.9 (68.4 to 95.4)                     | 92.4 (77.8 to 97.8) | 97.6 (89.0 to 99.5)  | 99.5                         |
|                            | Northwest           | 67.8 (62.6 to 72.7)                     | 81.6 (76.6 to 85.8) | 95.2 (92.4 to 97.0)  | 100.0                        |
|                            | Northeast           | 92.8 (90.7 to 94.5)                     | 96.4 (95.0 to 97.5) | 99.2 (98.6 to 99.5)  | 100.0                        |
|                            | Red River Delta     | 99.5 (99.1 to 99.7)                     | 99.7 (99.5 to 99.9) | 99.9 (99.9 to 100.0) | 100.0                        |
|                            | North Central       | 94.5 (92.8 to 96.0)                     | 97.3 (96.2 to 98.2) | 99.4 (98.9 to 99.7)  | 100.0                        |
| Skilled birth attendance   | South Central Coast | 96.4 (95.0 to 97.4)                     | 98.3 (97.4 to 98.8) | 99.6 (99.3 to 99.8)  | 100.0                        |
|                            | Central Highlands   | 86.8 (84.3 to 88.9)                     | 93.3 (91.4 to 94.8) | 98.4 (97.5 to 99.0)  | 100.0                        |
|                            | Southeast           | 99.2 (98.7 to 99.6)                     | 99.6 (99.4 to 99.8) | 99.9 (99.8 to 100.0) | 100.0                        |
|                            | Mekong River Delta  | 95.6 (84.4 to 98.8)                     | 97.8 (91.8 to 99.4) | 99.5 (97.9 to 99.9)  | 100.0                        |
|                            | Northwest           | 67.4 (62.6 to 72.0)                     | 80.1 (75.6 to 84.1) | 93.8 (91.1 to 95.8)  | 100.0                        |
|                            | Northeast           | 92.3 (90.4 to 93.9)                     | 95.9 (94.5 to 96.9) | 98.9 (98.3 to 99.3)  | 100.0                        |
|                            | Red River Delta     | 98.9 (98.4 to 99.3)                     | 99.4 (99.1 to 99.6) | 99.9 (99.7 to 99.9)  | 100.0                        |
| Care seeking for pneumonia | North Central       | 93.8 (92.0 to 95.2)                     | 96.7 (95.5 to 97.6) | 99.1 (98.6 to 99.4)  | 100.0                        |
|                            | South Central Coast | 95.3 (93.9 to 96.5)                     | 97.5 (96.6 to 98.3) | 99.3 (98.9 to 99.6)  | 100.0                        |
|                            | Central Highlands   | 87.5 (85.2 to 89.5)                     | 93.1 (91.3 to 94.6) | 98.1 (97.2 to 98.7)  | 100.0                        |
|                            | Southeast           | 98.5 (97.8 to 99.0)                     | 99.2 (98.8 to 99.5) | 99.8 (99.6 to 99.9)  | 100.0                        |
|                            | Mekong River Delta  | 94.3 (83.8 to 97.9)                     | 97.0 (90.9 to 98.9) | 99.2 (97.3 to 99.7)  | 100.0                        |
|                            | Northwest           | 82.6 (73.2 to 88.7)                     | 86.7 (76.9 to 92.4) | 92.5 (83.0 to 96.8)  | 99.1                         |
|                            | Northeast           | 84.0 (75.7 to 89.5)                     | 87.8 (79.4 to 93.1) | 93.1 (85.0 to 97.1)  | 99.5                         |
| ARI treatment              | Red River Delta     | 85.7 (79.4 to 90.6)                     | 89.1 (82.3 to 93.8) | 93.9 (86.8 to 97.4)  | 99.9                         |
|                            | North Central       | 86.9 (80.8 to 91.6)                     | 90.1 (83.6 to 94.5) | 94.5 (87.9 to 97.7)  | 99.9                         |
|                            | South Central Coast | 87.6 (81.6 to 92.4)                     | 90.6 (84.4 to 95.0) | 94.8 (88.6 to 97.9)  | 100.0                        |
|                            | Central Highlands   | 85.0 (78.8 to 89.9)                     | 88.6 (82.0 to 93.3) | 93.6 (86.8 to 97.2)  | 99.8                         |
|                            | Southeast           | 84.0 (76.0 to 89.4)                     | 87.8 (79.4 to 92.9) | 93.2 (84.9 to 97.1)  | 99.7                         |
|                            | Mekong River Delta  | 85.5 (79.6 to 90.3)                     | 89.0 (82.4 to 93.6) | 93.8 (86.9 to 97.4)  | 99.9                         |
|                            | Northwest           | 76.6 (41.6 to 89.2)                     | 86.2 (32.0 to 96.2) | 95.8 (16.2 to 99.6)  | 78.4                         |
| Oral rehydration therapy   | Northeast           | 79.2 (52.2 to 90.6)                     | 87.9 (41.1 to 96.8) | 96.3 (20.5 to 99.7)  | 79.9                         |
|                            | Red River Delta     | 85.1 (72.4 to 94.2)                     | 93.5 (79.3 to 98.7) | 98.9 (88.4 to 99.9)  | 99.0                         |
|                            | North Central       | 79.7 (64.1 to 89.8)                     | 90.7 (74.1 to 97.4) | 98.4 (86.1 to 99.9)  | 99.0                         |
|                            | South Central Coast | 81.4 (55.4 to 92.5)                     | 89.4 (44.1 to 97.5) | 96.8 (22.5 to 99.8)  | 80.8                         |
|                            | Central Highlands   | 83.0 (72.1 to 90.8)                     | 92.3 (80.4 to 97.6) | 98.7 (90.9 to 99.9)  | 99.7                         |
|                            | Southeast           | 88.9 (77.0 to 98.2)                     | 96.7 (87.4 to 99.9) | 99.7 (96.4 to 100.0) | 100.0                        |
|                            | Mekong River Delta  | 82.1 (67.5 to 90.8)                     | 91.6 (75.5 to 97.4) | 98.4 (86.5 to 99.8)  | 98.9                         |
| Oral rehydration therapy   | Northwest           | 32.8 (26.2 to 40.6)                     | 24.8 (18.4 to 32.5) | 13.1 (8.0 to 20.4)   | 0.0                          |
|                            | Northeast           | 28.8 (22.9 to 35.3)                     | 21.4 (15.8 to 28.2) | 11.0 (6.7 to 17.3)   | 0.0                          |
|                            | Red River Delta     | 30.8 (24.4 to 38.0)                     | 23.1 (17.1 to 30.5) | 12.1 (7.3 to 18.8)   | 0.0                          |
|                            | North Central       | 26.4 (19.1 to 33.4)                     | 19.5 (13.0 to 26.6) | 9.9 (5.5 to 16.3)    | 0.0                          |



| Indicators | Regions             | Predicted coverage in percent (95% CrI) |                     |                    | Probability reach target (%) |
|------------|---------------------|-----------------------------------------|---------------------|--------------------|------------------------------|
|            |                     | Year 2015                               | Year 2020           | Year 2030          |                              |
|            | South Central Coast | 23.8 (16.9 to 30.9)                     | 17.5 (11.4 to 24.5) | 8.7 (4.7 to 14.8)  | 0.0                          |
|            | Central Highlands   | 29.4 (24.3 to 35.3)                     | 22.0 (16.7 to 28.3) | 11.3 (7.1 to 17.6) | 0.0                          |
|            | Southeast           | 28.9 (22.4 to 36.2)                     | 21.6 (15.5 to 28.5) | 11.1 (6.7 to 17.5) | 0.0                          |
|            | Mekong River Delta  | 28.2 (22.4 to 33.9)                     | 20.9 (15.2 to 27.0) | 10.8 (6.4 to 16.8) | 0.0                          |

**Table S15: Average annual percent of change in RMNCH service indicators in different periods**

| Indicators                        | Average Annual Rate of Change (95% CrI) |                     |                     |
|-----------------------------------|-----------------------------------------|---------------------|---------------------|
|                                   | Period 2000-2030                        | Period 2000-2015    | Period 2015-2030    |
| At least one ANC visit            | 0.7 (0.6 to 0.8)                        | 1.1 (1.0 to 1.3)    | 0.3 (0.2 to 0.3)    |
| At least four ANC visit           | 2.4 (2.3 to 2.5)                        | 3.2 (2.9 to 3.4)    | 1.6 (1.5 to 1.6)    |
| Exclusive breastfeeding           | 0.4 (0.0 to 0.9)                        | 0.4 (0.0 to 0.7)    | 0.4 (0.0 to 1.0)    |
| Early initiation of breastfeeding | -0.7 (-0.9 to -0.4)                     | -0.7 (-1.0 to -0.4) | -0.6 (-0.9 to -0.4) |
| Family planning needs satisfied   | -0.9 (-1.0 to -0.7)                     | -0.8 (-1.0 to -0.7) | -0.9 (-1.1 to -0.8) |
| BCG immunization                  | 0.4 (0.3 to 0.5)                        | 0.5 (0.3 to 0.7)    | 0.2 (0.2 to 0.3)    |
| DPT3 immunization                 | 0.6 (0.4 to 0.9)                        | 0.7 (0.4 to 1.0)    | 0.6 (0.3 to 0.8)    |
| Polio3 immunization               | 0.8 (0.6 to 1.1)                        | 0.9 (0.6 to 1.2)    | 0.7 (0.5 to 0.9)    |
| Measles immunization              | 0.3 (0.0 to 0.5)                        | 0.3 (0.0 to 0.6)    | 0.3 (0.0 to 0.4)    |
| Full immunization                 | 0.8 (0.5 to 1.1)                        | 0.8 (0.5 to 1.1)    | 0.8 (0.5 to 1.0)    |
| Improved Water                    | 0.8 (0.8 to 0.8)                        | 1.3 (1.2 to 1.3)    | 0.4 (0.4 to 0.4)    |
| Adequate sanitation               | 1.4 (1.4 to 1.4)                        | 1.9 (1.9 to 2.0)    | 0.8 (0.8 to 0.8)    |
| Institutional delivery            | 0.8 (0.7 to 0.9)                        | 1.2 (1.0 to 1.4)    | 0.4 (0.4 to 0.4)    |
| Skilled birth attendance          | 0.9 (0.8 to 1.0)                        | 1.4 (1.2 to 1.6)    | 0.4 (0.4 to 0.5)    |
| Care seeking for pneumonia        | 0.8 (0.5 to 1.0)                        | 1.1 (0.5 to 1.5)    | 0.5 (0.4 to 0.6)    |
| ARI treatment                     | 2.4 (1.9 to 2.8)                        | 3.8 (2.7 to 4.7)    | 1.1 (0.8 to 1.3)    |
| Oral rehydration therapy          | -1.5 (-1.7 to -1.2)                     | -1.8 (-2.2 to -1.3) | -1.1 (-1.3 to -1.0) |
| Composite Prevention              | 0.9 (0.6 to 1.1)                        | 1.0 (0.6 to 1.4)    | 0.7 (0.5 to 0.9)    |
| Composite Treatment               | 0.9 (0.5 to 1.2)                        | 1.0 (0.5 to 1.6)    | 0.7 (0.4 to 0.8)    |
| Composite health coverage         | 1.0 (0.5 to 1.3)                        | 1.1 (0.6 to 1.7)    | 0.8 (0.5 to 0.9)    |

**Table S16: National health inequality analyses of all RMNCH service indicators for all survey years**

| Indicators                        | Year | Inequality between Wealth Quintiles |                             |                          | Inequality between Regional Levels |                          |                       | Inequality between Living Areas |                             |                          |
|-----------------------------------|------|-------------------------------------|-----------------------------|--------------------------|------------------------------------|--------------------------|-----------------------|---------------------------------|-----------------------------|--------------------------|
|                                   |      | RII                                 | SII                         | CnI                      | RII                                | SII                      | CnI                   | RII                             | SII                         | CnI                      |
| At least one ANC visit            | 2000 | 2.44 (2.10 to 2.83)**               | 68.43 (59.62 to 77.24)**    | 0.17 (0.14 to 0.19)**    | 2.25 (1.91 to 2.65)**              | 60.81 (50.44 to 71.17)** | 0.15 (0.12 to 0.18)** | 2.21 (1.88 to 2.59)**           | 62.48 (50.39 to 74.58)**    | 0.06 (0.04 to 0.08)**    |
|                                   | 2002 | 1.42 (1.34 to 1.51)**               | 31.91 (27.09 to 36.72)**    | 0.07 (0.06 to 0.08)**    | 1.34 (1.26 to 1.43)**              | 26.80 (21.71 to 31.88)** | 0.06 (0.05 to 0.08)** | 1.30 (1.22 to 1.40)**           | 23.94 (17.60 to 30.27)**    | 0.02 (0.01 to 0.03)**    |
|                                   | 2006 | 1.42 (1.33 to 1.52)**               | 32.17 (26.84 to 37.50)**    | 0.08 (0.07 to 0.09)**    | 1.40 (1.32 to 1.49)**              | 30.71 (25.66 to 35.75)** | 0.07 (0.06 to 0.08)** | 1.38 (1.28 to 1.49)**           | 29.20 (22.75 to 35.66)**    | 0.03 (0.02 to 0.04)**    |
|                                   | 2011 | 1.21 (1.16 to 1.26)**               | 18.03 (14.34 to 21.72)**    | 0.05 (0.04 to 0.06)**    | 1.19 (1.15 to 1.24)**              | 16.99 (13.53 to 20.45)** | 0.05 (0.04 to 0.05)** | 1.20 (1.14 to 1.26)**           | 16.89 (12.08 to 21.71)**    | 0.02 (0.01 to 0.03)**    |
|                                   | 2014 | 1.14 (1.11 to 1.18)**               | 13.26 (10.35 to 16.17)**    | 0.04 (0.03 to 0.05)**    | 1.13 (1.10 to 1.16)**              | 12.01 (9.52 to 14.50)**  | 0.04 (0.03 to 0.04)** | 1.15 (1.10 to 1.20)**           | 13.47 (9.52 to 17.42)**     | 0.02 (0.01 to 0.02)**    |
| At least four ANC visit           | 2002 | 7.76 (5.65 to 10.65)**              | 50.23 (42.42 to 58.04)**    | 0.30 (0.25 to 0.34)**    | 3.90 (2.88 to 5.28)**              | 38.71 (30.75 to 46.67)** | 0.21 (0.17 to 0.26)** | 4.85 (3.54 to 6.64)**           | 57.25 (44.21 to 70.29)**    | 0.16 (0.12 to 0.19)**    |
|                                   | 2011 | 4.08 (3.50 to 4.77)**               | 86.99 (80.08 to 93.91)**    | 0.25 (0.22 to 0.27)**    | 3.04 (2.62 to 3.53)**              | 64.93 (57.11 to 72.76)** | 0.18 (0.16 to 0.21)** | 2.83 (2.37 to 3.38)**           | 61.78 (51.89 to 71.67)**    | 0.13 (0.11 to 0.15)**    |
|                                   | 2014 | 2.52 (2.28 to 2.79)**               | 71.41 (65.52 to 77.31)**    | 0.19 (0.17 to 0.20)**    | 2.08 (1.87 to 2.31)**              | 54.52 (47.62 to 61.41)** | 0.14 (0.12 to 0.15)** | 1.79 (1.58 to 2.03)**           | 41.98 (33.14 to 50.81)**    | 0.07 (0.05 to 0.09)**    |
| Exclusive breastfeeding           | 2000 | 0.60 (0.25 to 1.46)                 | -9.01 (-24.56 to 6.54)      | -0.08 (-0.22 to 0.06)    | 19.45 (7.00 to 54.04)**            | 40.10 (30.95 to 49.25)** | 0.45 (0.32 to 0.58)** | 0.45 (0.09 to 2.17)             | -12.68 (-34.14 to 8.78)     | -0.05 (-0.14 to 0.04)    |
|                                   | 2002 | 1.28 (0.39 to 4.25)                 | 3.59 (-9.03 to 16.20)       | 0.04 (-0.15 to 0.23)     | 26.12 (6.04 to 113.01)**           | 22.90 (15.40 to 30.40)** | 0.46 (0.28 to 0.65)** | 0.87 (0.16 to 4.75)             | -1.43 (-18.64 to 15.78)     | -0.01 (-0.15 to 0.13)    |
|                                   | 2006 | 0.22 (0.08 to 0.63)**               | -23.10 (-37.85 to -8.34)**  | -0.23 (-0.38 to -0.07)** | 25.55 (7.89 to 82.76)**            | 38.31 (28.48 to 48.14)** | 0.45 (0.30 to 0.60)** | 0.15 (0.02 to 1.10)             | -23.05 (-40.65 to -5.45)**  | -0.12 (-0.23 to 0.00)**  |
|                                   | 2011 | 0.19 (0.07 to 0.47)**               | -22.37 (-35.11 to -9.63)**  | -0.25 (-0.39 to -0.12)** | 26.67 (9.41 to 75.58)**            | 34.77 (26.81 to 42.73)** | 0.45 (0.32 to 0.58)** | 0.34 (0.11 to 1.05)             | -15.74 (-30.73 to -0.75)**  | -0.12 (-0.23 to 0.00)**  |
|                                   | 2014 | 0.27 (0.14 to 0.55)**               | -22.63 (-35.82 to -9.44)**  | -0.20 (-0.30 to -0.09)** | 5.26 (2.63 to 10.54)**             | 33.97 (21.88 to 46.05)** | 0.27 (0.16 to 0.37)** | 0.44 (0.19 to 1.03)             | -15.96 (-31.41 to -0.50)**  | -0.09 (-0.18 to 0.00)**  |
| Early initiation of breastfeeding | 2002 | 0.98 (0.84 to 1.15)                 | -1.12 (-10.50 to 8.25)      | -0.00 (-0.03 to 0.02)    | 1.77 (1.52 to 2.06)**              | 34.82 (25.91 to 43.73)** | 0.10 (0.07 to 0.12)** | 0.75 (0.59 to 0.95)**           | -16.68 (-30.02 to -3.34)**  | -0.02 (-0.04 to 0.00)**  |
|                                   | 2006 | 1.83 (1.19 to 2.82)**               | 12.14 (3.40 to 20.89)**     | 0.10 (0.03 to 0.16)**    | 6.08 (3.87 to 9.56)**              | 36.11 (28.73 to 43.48)** | 0.28 (0.21 to 0.34)** | 1.54 (0.89 to 2.65)             | 9.33 (-3.16 to 21.83)       | 0.04 (-0.01 to 0.09)     |
|                                   | 2011 | 0.61 (0.51 to 0.72)**               | -26.18 (-35.35 to -17.01)** | -0.08 (-0.10 to -0.05)** | 1.99 (1.69 to 2.35)**              | 37.09 (28.25 to 45.94)** | 0.11 (0.08 to 0.14)** | 0.60 (0.49 to 0.74)**           | -27.34 (-38.08 to -16.61)** | -0.06 (-0.08 to -0.04)** |
|                                   | 2014 | 0.70 (0.56 to 0.86)**               | -15.61 (-24.42 to -6.80)**  | -0.06 (-0.09 to -0.03)** | 1.47 (1.19 to 1.81)**              | 16.28 (7.56 to 24.99)**  | 0.06 (0.03 to 0.10)** | 0.62 (0.48 to 0.81)**           | -19.17 (-29.38 to -8.96)**  | -0.05 (-0.08 to -0.02)** |
| Family planning needs satisfied   | 2002 | 0.80 (0.75 to 0.86)**               | -15.77 (-20.49 to -11.06)** | -0.03 (-0.05 to -0.02)** | 1.27 (1.19 to 1.35)**              | 17.05 (12.37 to 21.73)** | 0.04 (0.03 to 0.05)** | 0.89 (0.81 to 0.98)**           | -8.41 (-15.03 to -1.79)**   | -0.01 (-0.02 to 0.00)**  |
|                                   | 2011 | 0.86 (0.81 to 0.92)**               | -9.60 (-13.74 to -5.46)**   | -0.02 (-0.03 to -0.01)** | 1.13 (1.06 to 1.20)**              | 7.92 (3.82 to 12.02)**   | 0.02 (0.01 to 0.03)** | 0.92 (0.85 to 0.99)**           | -5.56 (-10.33 to -0.78)**   | -0.01 (-0.02 to 0.00)**  |
|                                   | 2014 | 0.94 (0.88 to 1.02)                 | -3.45 (-8.02 to 1.13)       | -0.01 (-0.02 to 0.00)    | 1.15 (1.07 to 1.24)**              | 8.87 (4.35 to 13.39)**   | 0.02 (0.01 to 0.03)** | 0.89 (0.82 to 0.97)**           | -6.99 (-12.28 to -1.70)**   | -0.01 (-0.02 to 0.00)**  |
| BCG immunization                  | 2000 | 1.42 (1.31 to 1.53)**               | 31.16 (24.80 to 37.51)**    | 0.05 (0.03 to 0.07)**    | 1.28 (1.16 to 1.43)**              | 22.19 (13.22 to 31.17)** | 0.05 (0.03 to 0.07)** | 1.37 (1.24 to 1.52)**           | 28.65 (19.79 to 37.51)**    | 0.02 (0.01 to 0.04)**    |
|                                   | 2002 | 1.18 (1.11 to 1.25)**               | 15.49 (10.15 to 20.84)**    | 0.03 (0.02 to 0.04)**    | 1.17 (1.11 to 1.24)**              | 15.15 (9.90 to 20.39)**  | 0.03 (0.01 to 0.04)** | 1.12 (1.03 to 1.21)**           | 10.63 (2.95 to 18.32)**     | 0.01 (-0.00 to 0.02)     |
|                                   | 2006 | 1.48 (1.32 to 1.66)**               | 34.74 (25.61 to 43.88)**    | 0.09 (0.07 to 0.11)**    | 1.42 (1.27 to 1.60)**              | 31.32 (21.93 to 40.72)** | 0.08 (0.06 to 0.10)** | 1.41 (1.24 to 1.61)**           | 30.11 (19.04 to 41.19)**    | 0.03 (0.01 to 0.05)**    |

| Indicators          | Year | Inequality between Wealth Quintiles |                          |                       | Inequality between Regional Levels |                          |                       | Inequality between Living Areas |                          |                       |
|---------------------|------|-------------------------------------|--------------------------|-----------------------|------------------------------------|--------------------------|-----------------------|---------------------------------|--------------------------|-----------------------|
|                     |      | RII                                 | SII                      | CnI                   | RII                                | SII                      | CnI                   | RII                             | SII                      | CnI                   |
| DPT3 immunization   | 2011 | 1.15 (1.08 to 1.22)**               | 12.90 (7.30 to 18.49)**  | 0.03 (0.02 to 0.04)** | 1.14 (1.07 to 1.20)**              | 12.15 (6.85 to 17.44)**  | 0.03 (0.02 to 0.04)** | 1.10 (1.02 to 1.18)**           | 9.01 (2.24 to 15.78)**   | 0.01 (0.00 to 0.02)** |
|                     | 2014 | 1.12 (1.08 to 1.17)**               | 11.36 (7.76 to 14.96)**  | 0.03 (0.02 to 0.04)** | 1.10 (1.07 to 1.14)**              | 9.69 (6.59 to 12.79)**   | 0.02 (0.01 to 0.03)** | 1.13 (1.07 to 1.19)**           | 11.47 (6.47 to 16.47)**  | 0.01 (0.01 to 0.02)** |
|                     | 2000 | 3.06 (2.30 to 4.07)**               | 57.07 (43.27 to 70.87)** | 0.17 (0.13 to 0.22)** | 3.01 (2.27 to 4.00)**              | 56.72 (43.48 to 69.96)** | 0.18 (0.14 to 0.23)** | 2.86 (2.11 to 3.89)**           | 61.78 (42.42 to 81.15)** | 0.09 (0.06 to 0.12)** |
|                     | 2002 | 1.77 (1.47 to 2.12)**               | 41.85 (28.98 to 54.73)** | 0.09 (0.06 to 0.12)** | 1.77 (1.49 to 2.11)**              | 43.49 (31.01 to 55.97)** | 0.10 (0.07 to 0.13)** | 1.50 (1.21 to 1.86)**           | 31.11 (14.13 to 48.09)** | 0.04 (0.01 to 0.06)** |
|                     | 2006 | 2.33 (1.89 to 2.87)**               | 56.32 (43.79 to 68.85)** | 0.14 (0.11 to 0.18)** | 2.13 (1.73 to 2.63)**              | 50.05 (37.38 to 62.72)** | 0.13 (0.10 to 0.17)** | 2.14 (1.71 to 2.68)**           | 53.43 (37.25 to 69.62)** | 0.07 (0.04 to 0.09)** |
|                     | 2011 | 2.27 (1.78 to 2.90)**               | 42.27 (30.42 to 54.13)** | 0.13 (0.09 to 0.17)** | 2.38 (1.88 to 3.03)**              | 43.62 (32.00 to 55.23)** | 0.14 (0.10 to 0.18)** | 2.14 (1.63 to 2.80)**           | 39.73 (25.73 to 53.73)** | 0.09 (0.06 to 0.13)** |
|                     | 2014 | 1.49 (1.30 to 1.70)**               | 31.82 (21.90 to 41.74)** | 0.07 (0.05 to 0.10)** | 1.52 (1.33 to 1.73)**              | 32.75 (23.06 to 42.43)** | 0.07 (0.05 to 0.10)** | 1.17 (1.00 to 1.37)             | 11.92 (-0.07 to 23.91)   | 0.02 (-0.00 to 0.04)  |
|                     | 2000 | 3.82 (2.90 to 5.04)**               | 69.01 (55.90 to 82.11)** | 0.21 (0.17 to 0.25)** | 2.75 (2.06 to 3.66)**              | 54.27 (40.90 to 67.64)** | 0.18 (0.13 to 0.22)** | 3.65 (2.76 to 4.82)**           | 78.76 (61.17 to 96.35)** | 0.12 (0.09 to 0.15)** |
|                     | 2002 | 1.78 (1.51 to 2.10)**               | 43.73 (31.69 to 55.76)** | 0.09 (0.06 to 0.12)** | 1.78 (1.53 to 2.08)**              | 45.39 (34.06 to 56.72)** | 0.10 (0.07 to 0.13)** | 1.66 (1.38 to 1.98)**           | 40.51 (25.86 to 55.17)** | 0.05 (0.02 to 0.07)** |
|                     | 2006 | 2.18 (1.73 to 2.74)**               | 49.26 (35.95 to 62.57)** | 0.13 (0.10 to 0.17)** | 2.31 (1.84 to 2.89)**              | 52.88 (40.05 to 65.71)** | 0.15 (0.11 to 0.18)** | 2.00 (1.55 to 2.58)**           | 45.82 (28.10 to 63.53)** | 0.06 (0.04 to 0.09)** |
| Polio3 immunization | 2011 | 1.84 (1.39 to 2.42)**               | 27.97 (15.84 to 40.10)** | 0.10 (0.05 to 0.14)** | 2.27 (1.72 to 2.98)**              | 34.86 (23.06 to 46.66)** | 0.13 (0.08 to 0.17)** | 2.01 (1.48 to 2.73)**           | 32.00 (17.85 to 46.16)** | 0.09 (0.05 to 0.12)** |
|                     | 2014 | 1.34 (1.21 to 1.48)**               | 25.84 (17.66 to 34.01)** | 0.06 (0.05 to 0.08)** | 1.38 (1.25 to 1.51)**              | 27.81 (20.09 to 35.52)** | 0.06 (0.04 to 0.08)** | 1.24 (1.11 to 1.39)**           | 18.44 (8.68 to 28.21)**  | 0.03 (0.01 to 0.04)** |
|                     | 2000 | 1.94 (1.63 to 2.32)**               | 47.88 (35.70 to 60.07)** | 0.11 (0.08 to 0.14)** | 1.72 (1.43 to 2.08)**              | 37.88 (25.26 to 50.50)** | 0.09 (0.06 to 0.12)** | 1.66 (1.34 to 2.06)**           | 38.00 (21.24 to 54.76)** | 0.04 (0.02 to 0.06)** |
|                     | 2002 | 1.46 (1.29 to 1.64)**               | 32.49 (22.59 to 42.38)** | 0.07 (0.05 to 0.09)** | 1.50 (1.34 to 1.68)**              | 35.51 (26.32 to 44.70)** | 0.08 (0.06 to 0.10)** | 1.24 (1.06 to 1.45)**           | 18.23 (4.43 to 32.03)**  | 0.02 (0.00 to 0.03)** |
|                     | 2006 | 1.93 (1.64 to 2.27)**               | 51.49 (40.36 to 62.62)** | 0.13 (0.10 to 0.16)** | 1.71 (1.44 to 2.02)**              | 42.20 (30.50 to 53.90)** | 0.11 (0.08 to 0.14)** | 1.62 (1.34 to 1.96)**           | 37.24 (22.16 to 52.31)** | 0.04 (0.02 to 0.06)** |
|                     | 2011 | 1.91 (1.64 to 2.23)**               | 48.35 (38.18 to 58.51)** | 0.12 (0.09 to 0.14)** | 1.67 (1.43 to 1.94)**              | 36.26 (25.75 to 46.76)** | 0.08 (0.06 to 0.11)** | 1.71 (1.44 to 2.04)**           | 38.68 (26.44 to 50.92)** | 0.07 (0.04 to 0.09)** |
|                     | 2014 | 1.28 (1.15 to 1.43)**               | 21.46 (12.36 to 30.57)** | 0.05 (0.03 to 0.07)** | 1.40 (1.26 to 1.55)**              | 28.18 (19.69 to 36.67)** | 0.06 (0.04 to 0.08)** | 1.02 (0.89 to 1.17)             | 1.83 (-9.15 to 12.81)    | 0.00 (-0.01 to 0.02)  |
|                     | 2000 | 5.69 (3.78 to 8.57)**               | 60.06 (46.91 to 73.21)** | 0.27 (0.21 to 0.33)** | 4.22 (2.81 to 6.35)**              | 52.23 (39.75 to 64.71)** | 0.24 (0.18 to 0.30)** | 4.78 (3.15 to 7.28)**           | 68.68 (47.82 to 89.55)** | 0.14 (0.10 to 0.19)** |
|                     | 2002 | 2.07 (1.68 to 2.56)**               | 49.42 (35.88 to 62.96)** | 0.12 (0.08 to 0.15)** | 1.97 (1.59 to 2.44)**              | 46.54 (32.96 to 60.13)** | 0.12 (0.08 to 0.15)** | 1.64 (1.28 to 2.10)**           | 35.53 (17.14 to 53.91)** | 0.04 (0.02 to 0.07)** |
|                     | 2006 | 2.88 (2.14 to 3.88)**               | 54.21 (40.63 to 67.78)** | 0.17 (0.13 to 0.22)** | 2.38 (1.77 to 3.20)**              | 45.13 (31.47 to 58.78)** | 0.15 (0.10 to 0.20)** | 2.49 (1.80 to 3.45)**           | 50.38 (31.05 to 69.70)** | 0.09 (0.05 to 0.12)** |
| Full immunization   | 2011 | 2.25 (1.62 to 3.11)**               | 30.98 (19.28 to 42.68)** | 0.13 (0.08 to 0.18)** | 2.68 (1.94 to 3.70)**              | 33.71 (22.26 to 45.16)** | 0.15 (0.10 to 0.20)** | 2.21 (1.54 to 3.16)**           | 30.52 (16.60 to 44.44)** | 0.10 (0.05 to 0.14)** |
|                     | 2014 | 1.60 (1.35 to 1.90)**               | 33.94 (22.82 to 45.05)** | 0.09 (0.06 to 0.11)** | 1.70 (1.44 to 2.00)**              | 36.76 (25.95 to 47.57)** | 0.09 (0.06 to 0.12)** | 1.08 (0.89 to 1.32)             | 5.17 (-8.21 to 18.55)    | 0.01 (-0.01 to 0.03)  |
|                     | 2000 | 2.24 (2.19 to 2.29)**               | 58.71 (57.31 to 60.11)** | 0.14 (0.14 to 0.14)** | 2.18 (2.13 to 2.22)**              | 57.34 (55.95 to 58.73)** | 0.15 (0.15 to 0.15)** | 2.18 (2.13 to 2.23)**           | 59.16 (57.49 to 60.82)** | 0.08 (0.07 to 0.08)** |
|                     | 2002 | 1.35 (1.34 to 1.37)**               | 27.75 (26.85 to 28.65)** | 0.06 (0.06 to 0.06)** | 1.35 (1.34 to 1.37)**              | 28.43 (27.51 to 29.34)** | 0.08 (0.08 to 0.08)** | 1.27 (1.25 to 1.29)**           | 21.97 (20.85 to 23.10)** | 0.02 (0.02 to 0.02)** |
| Improved Water      | 2000 | 2.24 (2.19 to 2.29)**               | 58.71 (57.31 to 60.11)** | 0.14 (0.14 to 0.14)** | 2.18 (2.13 to 2.22)**              | 57.34 (55.95 to 58.73)** | 0.15 (0.15 to 0.15)** | 2.18 (2.13 to 2.23)**           | 59.16 (57.49 to 60.82)** | 0.08 (0.07 to 0.08)** |
|                     | 2002 | 1.35 (1.34 to 1.37)**               | 27.75 (26.85 to 28.65)** | 0.06 (0.06 to 0.06)** | 1.35 (1.34 to 1.37)**              | 28.43 (27.51 to 29.34)** | 0.08 (0.08 to 0.08)** | 1.27 (1.25 to 1.29)**           | 21.97 (20.85 to 23.10)** | 0.02 (0.02 to 0.02)** |

| Indicators                 | Year | Inequality between Wealth Quintiles |                             |                       | Inequality between Regional Levels |                          |                       | Inequality between Living Areas |                          |                       |
|----------------------------|------|-------------------------------------|-----------------------------|-----------------------|------------------------------------|--------------------------|-----------------------|---------------------------------|--------------------------|-----------------------|
|                            |      | RII                                 | SII                         | CnI                   | RII                                | SII                      | CnI                   | RII                             | SII                      | CnI                   |
| Adequate sanitation        | 2006 | 1.45 (1.42 to 1.48)**               | 27.46 (25.95 to 28.96)**    | 0.06 (0.05 to 0.06)** | 1.72 (1.68 to 1.75)**              | 42.81 (41.47 to 44.16)** | 0.10 (0.10 to 0.11)** | 1.70 (1.67 to 1.74)**           | 42.49 (40.87 to 44.12)** | 0.05 (0.05 to 0.05)** |
|                            | 2011 | 1.27 (1.26 to 1.28)**               | 22.23 (21.53 to 22.93)**    | 0.06 (0.05 to 0.06)** | 1.22 (1.22 to 1.23)**              | 19.05 (18.36 to 19.74)** | 0.04 (0.04 to 0.04)** | 1.27 (1.26 to 1.29)**           | 22.35 (21.42 to 23.28)** | 0.03 (0.03 to 0.03)** |
|                            | 2014 | 1.25 (1.24 to 1.26)**               | 21.09 (20.41 to 21.76)**    | 0.05 (0.05 to 0.06)** | 1.21 (1.20 to 1.22)**              | 17.85 (17.14 to 18.56)** | 0.03 (0.03 to 0.03)** | 1.23 (1.22 to 1.25)**           | 19.44 (18.47 to 20.40)** | 0.03 (0.02 to 0.03)** |
|                            | 2000 | 19.41 (18.48 to 20.40)**            | 106.71 (105.73 to 107.69)** | 0.45 (0.44 to 0.45)** | 5.38 (5.14 to 5.63)**              | 61.85 (60.32 to 63.37)** | 0.26 (0.26 to 0.27)** | 7.29 (6.98 to 7.62)**           | 97.05 (94.93 to 99.17)** | 0.22 (0.21 to 0.22)** |
|                            | 2002 | 1.70 (1.67 to 1.72)**               | 45.18 (44.11 to 46.24)**    | 0.09 (0.09 to 0.09)** | 1.66 (1.64 to 1.69)**              | 43.40 (42.29 to 44.52)** | 0.09 (0.09 to 0.09)** | 1.49 (1.47 to 1.52)**           | 34.58 (33.15 to 36.01)** | 0.04 (0.04 to 0.04)** |
|                            | 2006 | 4.54 (4.42 to 4.66)**               | 100.29 (99.33 to 101.26)**  | 0.28 (0.28 to 0.28)** | 2.84 (2.76 to 2.92)**              | 66.12 (64.66 to 67.58)** | 0.18 (0.18 to 0.19)** | 3.11 (3.03 to 3.20)**           | 77.80 (76.07 to 79.53)** | 0.12 (0.11 to 0.12)** |
|                            | 2011 | 2.08 (2.05 to 2.11)**               | 61.83 (60.89 to 62.76)**    | 0.16 (0.16 to 0.17)** | 1.81 (1.79 to 1.84)**              | 49.18 (48.18 to 50.18)** | 0.11 (0.11 to 0.12)** | 1.87 (1.84 to 1.91)**           | 49.34 (47.95 to 50.73)** | 0.08 (0.08 to 0.08)** |
|                            | 2014 | 1.84 (1.82 to 1.87)**               | 53.97 (53.03 to 54.92)**    | 0.16 (0.15 to 0.16)** | 1.67 (1.65 to 1.70)**              | 44.13 (43.13 to 45.13)** | 0.10 (0.10 to 0.11)** | 1.62 (1.59 to 1.65)**           | 39.47 (38.05 to 40.89)** | 0.06 (0.06 to 0.06)** |
|                            | 2002 | 1.83 (1.69 to 1.97)**               | 51.19 (45.85 to 56.53)**    | 0.12 (0.11 to 0.14)** | 1.72 (1.59 to 1.87)**              | 46.52 (40.53 to 52.50)** | 0.12 (0.10 to 0.13)** | 1.73 (1.61 to 1.87)**           | 47.38 (41.34 to 53.42)** | 0.05 (0.04 to 0.06)** |
|                            | 2006 | 2.05 (1.87 to 2.25)**               | 60.89 (54.80 to 66.98)**    | 0.16 (0.15 to 0.18)** | 1.94 (1.78 to 2.10)**              | 55.39 (49.99 to 60.78)** | 0.15 (0.14 to 0.17)** | 2.03 (1.84 to 2.23)**           | 58.96 (52.12 to 65.79)** | 0.07 (0.05 to 0.08)** |
| Institutional delivery     | 2011 | 1.35 (1.28 to 1.42)**               | 28.19 (23.93 to 32.46)**    | 0.08 (0.07 to 0.09)** | 1.31 (1.25 to 1.37)**              | 25.30 (21.12 to 29.48)** | 0.07 (0.06 to 0.08)** | 1.36 (1.27 to 1.45)**           | 27.73 (22.13 to 33.33)** | 0.04 (0.03 to 0.05)** |
|                            | 2014 | 1.27 (1.22 to 1.33)**               | 23.00 (19.44 to 26.57)**    | 0.07 (0.06 to 0.08)** | 1.24 (1.19 to 1.29)**              | 20.63 (17.19 to 24.08)** | 0.06 (0.05 to 0.07)** | 1.28 (1.21 to 1.35)**           | 22.77 (17.88 to 27.65)** | 0.03 (0.02 to 0.04)** |
|                            | 2000 | 3.49 (2.90 to 4.18)**               | 84.24 (75.35 to 93.14)**    | 0.21 (0.18 to 0.24)** | 3.05 (2.51 to 3.71)**              | 76.51 (66.19 to 86.82)** | 0.22 (0.18 to 0.25)** | 3.10 (2.56 to 3.74)**           | 82.57 (70.21 to 94.93)** | 0.09 (0.07 to 0.12)** |
|                            | 2002 | 1.50 (1.41 to 1.59)**               | 36.70 (31.99 to 41.41)**    | 0.10 (0.08 to 0.11)** | 1.50 (1.42 to 1.59)**              | 36.64 (32.07 to 41.20)** | 0.09 (0.07 to 0.10)** | 1.43 (1.34 to 1.52)**           | 32.13 (26.65 to 37.61)** | 0.03 (0.02 to 0.04)** |
| Skilled birth attendance   | 2006 | 2.57 (2.25 to 2.94)**               | 68.44 (60.53 to 76.34)**    | 0.17 (0.15 to 0.19)** | 2.06 (1.79 to 2.37)**              | 50.52 (41.58 to 59.45)** | 0.13 (0.10 to 0.15)** | 2.34 (2.03 to 2.69)**           | 63.10 (53.04 to 73.17)** | 0.08 (0.06 to 0.10)** |
|                            | 2011 | 1.32 (1.26 to 1.39)**               | 25.93 (21.89 to 29.98)**    | 0.08 (0.07 to 0.09)** | 1.28 (1.22 to 1.33)**              | 23.12 (19.35 to 26.90)** | 0.07 (0.06 to 0.08)** | 1.35 (1.27 to 1.44)**           | 27.37 (21.99 to 32.75)** | 0.04 (0.03 to 0.04)** |
|                            | 2014 | 1.23 (1.19 to 1.28)**               | 20.09 (16.73 to 23.46)**    | 0.06 (0.05 to 0.07)** | 1.21 (1.16 to 1.25)**              | 17.91 (14.67 to 21.16)** | 0.05 (0.05 to 0.06)** | 1.24 (1.18 to 1.30)**           | 19.88 (15.27 to 24.50)** | 0.03 (0.02 to 0.03)** |
|                            | 2000 | 0.86 (0.64 to 1.17)                 | -9.12 (-28.00 to 9.75)      | -0.02 (-0.07 to 0.02) | 2.15 (1.62 to 2.85)**              | 49.85 (33.13 to 66.58)** | 0.13 (0.08 to 0.18)** | 0.96 (0.58 to 1.58)             | -2.80 (-33.71 to 28.10)  | -0.00 (-0.03 to 0.03) |
| Care seeking for pneumonia | 2002 | 1.16 (0.97 to 1.39)                 | 12.89 (-2.15 to 27.93)      | 0.02 (-0.00 to 0.05)  | 1.26 (1.06 to 1.50)**              | 20.30 (5.92 to 34.67)**  | 0.04 (0.01 to 0.07)** | 1.16 (0.92 to 1.46)             | 12.88 (-7.42 to 33.18)   | 0.01 (-0.01 to 0.03)  |
|                            | 2006 | 1.29 (0.97 to 1.71)                 | 19.08 (-1.99 to 40.15)      | 0.04 (-0.01 to 0.09)  | 1.57 (1.20 to 2.05)**              | 35.29 (15.73 to 54.84)** | 0.08 (0.04 to 0.13)** | 0.88 (0.55 to 1.40)             | -9.74 (-43.10 to 23.62)  | -0.01 (-0.04 to 0.02) |
|                            | 2011 | 0.85 (0.61 to 1.17)                 | -13.23 (-38.31 to 11.85)    | -0.03 (-0.08 to 0.02) | 1.81 (1.46 to 2.24)**              | 49.04 (34.37 to 63.70)** | 0.10 (0.04 to 0.15)** | 0.74 (0.48 to 1.15)             | -22.69 (-54.55 to 9.18)  | -0.03 (-0.08 to 0.01) |
|                            | 2014 | 1.25 (1.00 to 1.56)                 | 19.58 (0.42 to 38.73)*      | 0.04 (-0.00 to 0.08)  | 1.40 (1.20 to 1.65)**              | 31.06 (18.06 to 44.06)** | 0.08 (0.04 to 0.12)** | 1.14 (0.87 to 1.49)             | 11.54 (-11.90 to 34.98)  | 0.01 (-0.02 to 0.05)  |
| ARI treatment              | 2006 | 1.11 (0.68 to 1.81)                 | 5.08 (-19.70 to 29.86)      | 0.02 (-0.06 to 0.10)  | 2.48 (1.54 to 4.00)**              | 47.55 (24.80 to 70.30)** | 0.15 (0.07 to 0.23)** | 0.99 (0.47 to 2.07)             | -0.61 (-37.57 to 36.34)  | -0.00 (-0.05 to 0.05) |
|                            | 2011 | 1.61 (1.03 to 2.50)*                | 31.41 (3.44 to 59.39)*      | 0.08 (0.01 to 0.15)*  | 2.02 (1.32 to 3.09)**              | 48.78 (22.80 to 74.75)** | 0.13 (0.06 to 0.20)** | 1.06 (0.62 to 1.81)             | 3.57 (-31.19 to 38.32)   | 0.01 (-0.05 to 0.07)  |

| Indicators               | Year | Inequality between Wealth Quintiles |                          |                       | Inequality between Regional Levels |                          |                       | Inequality between Living Areas |                          |                       |
|--------------------------|------|-------------------------------------|--------------------------|-----------------------|------------------------------------|--------------------------|-----------------------|---------------------------------|--------------------------|-----------------------|
|                          |      | RII                                 | SII                      | CnI                   | RII                                | SII                      | CnI                   | RII                             | SII                      | CnI                   |
| Oral rehydration therapy | 2014 | 1.35 (1.05 to 1.75)*                | 25.90 (4.71 to 47.09)*   | 0.06 (0.01 to 0.10)*  | 1.56 (1.30 to 1.89)**              | 38.98 (24.44 to 53.52)** | 0.08 (0.04 to 0.12)** | 1.43 (1.08 to 1.90)*            | 30.42 (6.83 to 54.01)*   | 0.04 (0.00 to 0.08)*  |
|                          | 2000 | 1.32 (0.93 to 1.86)                 | 14.79 (-4.36 to 33.94)   | 0.04 (-0.01 to 0.09)  | 1.76 (1.26 to 2.46)**              | 30.55 (12.87 to 48.24)** | 0.09 (0.04 to 0.15)** | 1.16 (0.65 to 2.07)             | 8.19 (-25.07 to 41.46)   | 0.01 (-0.02 to 0.04)  |
|                          | 2002 | 2.31 (1.11 to 4.81)*                | 29.75 (0.84 to 58.66)*   | 0.12 (0.01 to 0.24)*  | 2.26 (1.07 to 4.74)*               | 35.10 (7.77 to 62.44)*   | 0.14 (0.02 to 0.26)*  | 1.15 (0.28 to 4.70)             | 5.56 (-52.77 to 63.88)   | 0.01 (-0.05 to 0.07)  |
|                          | 2006 | 0.93 (0.65 to 1.35)                 | -4.32 (-28.28 to 19.63)  | -0.01 (-0.07 to 0.05) | 1.74 (1.23 to 2.45)**              | 35.10 (12.99 to 57.20)** | 0.08 (0.03 to 0.14)** | 0.84 (0.42 to 1.68)             | -10.83 (-53.11 to 31.45) | -0.01 (-0.04 to 0.02) |
|                          | 2011 | 1.44 (0.74 to 2.80)                 | 11.54 (-7.92 to 30.99)   | 0.06 (-0.05 to 0.17)  | 3.11 (1.58 to 6.11)**              | 36.50 (18.81 to 54.18)** | 0.19 (0.08 to 0.30)** | 1.08 (0.48 to 2.45)             | 2.29 (-21.90 to 26.49)   | 0.01 (-0.08 to 0.09)  |
|                          | 2014 | 2.75 (1.50 to 5.04)**               | 29.63 (10.98 to 48.29)** | 0.15 (0.06 to 0.24)** | 2.64 (1.44 to 4.85)**              | 31.11 (14.07 to 48.14)** | 0.16 (0.06 to 0.26)** | 2.46 (1.25 to 4.83)**           | 29.32 (5.89 to 52.74)*   | 0.10 (0.02 to 0.18)*  |

Note: \*\*\*, \*\*, \* Statistically significant results with P<0.001, P<0.01, and P<0.05, respectively; RII=Relative Index of Inequality; SII=Slope Index of Inequality; CnI=Concentrate Index of Inequality; CI=Confidence Interval;

**Table S17: Socioeconomic inequality in RMNCH service for all survey years stratifying by living areas**

| Indicators                        | Year | Relative Index of Inequality |                       | Slope Index of Inequality   |                            | Concentrate Index of Inequality |                         |
|-----------------------------------|------|------------------------------|-----------------------|-----------------------------|----------------------------|---------------------------------|-------------------------|
|                                   |      | Rural                        | Urban                 | Rural                       | Urban                      | Rural                           | Urban                   |
| At least one ANC visit            | 2000 | 2.52 (2.06 to 3.08)**        | 1.26 (1.00 to 1.57)*  | 65.95 (53.47 to 78.44)**    | 21.50 (1.60 to 41.40)*     | 0.16 (0.13 to 0.20)**           | 0.03 (0.01 to 0.05)*    |
|                                   | 2002 | 1.47 (1.38 to 1.56)**        | 1.17 (1.01 to 1.35)*  | 34.41 (29.82 to 38.99)**    | 14.65 (1.61 to 27.68)*     | 0.08 (0.06 to 0.09)**           | 0.02 (0.01 to 0.03)**   |
|                                   | 2006 | 1.51 (1.41 to 1.61)**        | 1.03 (0.95 to 1.11)   | 36.60 (31.27 to 41.93)**    | 2.69 (-5.21 to 10.58)      | 0.09 (0.08 to 0.11)**           | 0.00 (-0.01 to 0.01)    |
|                                   | 2011 | 1.28 (1.22 to 1.35)**        | 1.05 (1.00 to 1.10)*  | 23.44 (18.94 to 27.94)**    | 4.61 (0.20 to 9.02)*       | 0.07 (0.06 to 0.08)**           | 0.01 (0.00 to 0.01)*    |
|                                   | 2014 | 1.20 (1.15 to 1.25)**        | 1.03 (1.00 to 1.07)   | 17.46 (13.76 to 21.16)**    | 3.31 (0.03 to 6.59)*       | 0.05 (0.04 to 0.06)**           | 0.01 (0.00 to 0.01)**   |
| At least four ANC visit           | 2002 | 5.64 (3.79 to 8.40)**        | 3.86 (1.93 to 7.73)** | 34.62 (25.90 to 43.34)**    | 56.22 (31.98 to 80.46)**   | 0.25 (0.19 to 0.31)**           | 0.12 (0.07 to 0.17)**   |
|                                   | 2011 | 5.55 (4.34 to 7.12)**        | 1.99 (1.65 to 2.41)** | 81.75 (71.76 to 91.75)**    | 53.54 (41.05 to 66.02)**   | 0.28 (0.24 to 0.31)**           | 0.11 (0.09 to 0.14)**   |
|                                   | 2014 | 2.94 (2.55 to 3.39)**        | 1.78 (1.54 to 2.05)** | 75.75 (67.68 to 83.81)**    | 49.56 (39.16 to 59.96)**   | 0.20 (0.18 to 0.23)**           | 0.11 (0.09 to 0.13)**   |
| Exclusive breastfeeding           | 2000 | 0.84 (0.33 to 2.15)          | 0.29 (0.02 to 4.61)   | -3.04 (-20.83 to 14.76)     | -15.06 (-55.60 to 25.48)   | -0.03 (-0.17 to 0.12)           | -0.17 (-0.56 to 0.22)   |
|                                   | 2002 | 1.69 (0.44 to 6.50)          | 1.10 (0.04 to 28.64)  | 7.49 (-6.85 to 21.82)       | 1.15 (-30.67 to 32.97)     | 0.09 (-0.13 to 0.30)            | 0.01 (-0.36 to 0.38)    |
|                                   | 2006 | 0.28 (0.09 to 0.85)*         | 0.58 (0.02 to 20.58)  | -20.23 (-38.52 to -1.95)*   | -4.66 (-33.13 to 23.81)    | -0.18 (-0.34 to -0.02)*         | -0.08 (-0.57 to 0.42)   |
|                                   | 2011 | 0.16 (0.05 to 0.52)**        | 0.82 (0.14 to 4.98)   | -31.62 (-47.49 to -15.75)** | -2.13 (-22.08 to 17.82)    | -0.25 (-0.40 to -0.10)**        | -0.03 (-0.30 to 0.24)   |
|                                   | 2014 | 0.22 (0.09 to 0.51)**        | 0.83 (0.22 to 3.08)   | -31.38 (-48.32 to -14.44)** | -2.85 (-23.64 to 17.95)    | -0.22 (-0.34 to -0.10)**        | -0.03 (-0.24 to 0.18)   |
| Early initiation of breastfeeding | 2002 | 1.16 (0.98 to 1.37)          | 1.04 (0.64 to 1.71)   | 9.70 (-0.78 to 20.17)       | 2.26 (-23.62 to 28.13)     | 0.03 (-0.00 to 0.05)            | 0.00 (-0.05 to 0.06)    |
|                                   | 2006 | 1.58 (0.95 to 2.63)          | 2.31 (0.85 to 6.22)   | 8.92 (-0.98 to 18.82)       | 19.01 (-1.53 to 39.55)     | 0.07 (-0.01 to 0.15)            | 0.10 (-0.02 to 0.22)    |
|                                   | 2011 | 0.65 (0.53 to 0.79)**        | 1.09 (0.78 to 1.52)   | -26.26 (-38.11 to -14.41)** | 3.93 (-11.50 to 19.36)     | -0.07 (-0.10 to -0.04)**        | 0.01 (-0.04 to 0.06)    |
|                                   | 2014 | 0.88 (0.68 to 1.14)          | 0.64 (0.43 to 0.95)*  | -5.69 (-17.18 to 5.79)      | -17.25 (-31.68 to -2.81)*  | -0.02 (-0.06 to 0.02)           | -0.07 (-0.13 to -0.01)* |
| Family planning needs satisfied   | 2002 | 0.82 (0.76 to 0.88)**        | 0.78 (0.66 to 0.92)** | -14.40 (-19.75 to -9.05)**  | -17.30 (-29.50 to -5.10)** | -0.03 (-0.04 to -0.02)**        | -0.03 (-0.05 to -0.01)* |
|                                   | 2011 | 0.82 (0.76 to 0.89)**        | 0.98 (0.88 to 1.09)   | -12.80 (-18.24 to -7.37)**  | -1.09 (-7.85 to 5.67)      | -0.03 (-0.04 to -0.02)**        | -0.00 (-0.02 to 0.01)   |
|                                   | 2014 | 0.95 (0.86 to 1.04)          | 1.15 (1.01 to 1.30)*  | -3.49 (-9.40 to 2.43)       | 7.82 (0.25 to 15.38)*      | -0.01 (-0.02 to 0.01)           | 0.02 (0.00 to 0.04)*    |
| BCG immunization                  | 2000 | 1.35 (1.19 to 1.54)**        | 1.08 (0.97 to 1.21)   | 25.81 (14.96 to 36.66)**    | 7.94 (-2.86 to 18.75)      | 0.05 (0.02 to 0.07)**           | 0.01 (-0.01 to 0.02)    |
|                                   | 2002 | 1.18 (1.11 to 1.26)**        | 1.13 (0.95 to 1.34)   | 15.85 (10.20 to 21.50)**    | 11.78 (-4.03 to 27.59)     | 0.03 (0.02 to 0.05)**           | 0.01 (0.00 to 0.03)*    |
|                                   | 2006 | 1.43 (1.26 to 1.63)**        | 1.10 (0.92 to 1.32)   | 42.31 (29.89 to 54.73)**    | 9.09 (-7.71 to 25.88)      | 0.10 (0.07 to 0.12)**           | 0.01 (-0.01 to 0.03)    |
|                                   | 2011 | 1.18 (1.08 to 1.28)**        | 1.07 (0.98 to 1.17)   | 15.41 (7.71 to 23.11)**     | 6.54 (-1.79 to 14.88)      | 0.03 (0.02 to 0.05)**           | 0.01 (0.00 to 0.03)*    |
|                                   | 2014 | 1.16 (1.10 to 1.22)**        | 1.03 (1.00 to 1.08)   | 14.54 (9.80 to 19.29)**     | 3.39 (-0.41 to 7.19)       | 0.04 (0.03 to 0.06)**           | 0.01 (-0.00 to 0.01)    |
| DPT3 immunization                 | 2000 | 2.80 (1.96 to 4.02)**        | 1.53 (0.98 to 2.41)   | 48.39 (32.26 to 64.52)**    | 29.39 (-2.42 to 61.20)     | 0.16 (0.11 to 0.22)**           | 0.05 (-0.01 to 0.11)    |
|                                   | 2002 | 1.75 (1.40 to 2.19)**        | 1.48 (0.97 to 2.27)   | 39.25 (23.79 to 54.70)**    | 31.50 (-0.78 to 63.79)     | 0.09 (0.05 to 0.12)**           | 0.04 (0.00 to 0.08)     |
|                                   | 2006 | 2.30 (1.75 to 3.01)**        | 1.20 (0.87 to 1.66)   | 51.46 (36.27 to 66.66)**    | 15.19 (-11.27 to 41.65)    | 0.14 (0.10 to 0.18)**           | 0.02 (-0.02 to 0.07)    |
|                                   | 2011 | 1.76 (1.22 to 2.55)**        | 1.66 (1.19 to 2.31)** | 25.55 (9.53 to 41.56)**     | 31.72 (12.18 to 51.25)**   | 0.09 (0.03 to 0.15)**           | 0.07 (0.03 to 0.12)**   |
| Polio3 immunization               | 2014 | 1.70 (1.43 to 2.01)**        | 1.28 (1.04 to 1.58)*  | 41.04 (28.53 to 53.55)**    | 20.14 (3.66 to 36.62)*     | 0.09 (0.06 to 0.12)**           | 0.04 (0.01 to 0.07)**   |
|                                   | 2000 | 3.47 (2.40 to 5.01)**        | 1.31 (0.91 to 1.87)   | 56.12 (40.33 to 71.91)**    | 20.77 (-7.59 to 49.14)     | 0.19 (0.14 to 0.25)**           | 0.03 (-0.02 to 0.08)    |
|                                   | 2002 | 1.69 (1.36 to 2.10)**        | 1.19 (0.88 to 1.61)   | 37.01 (21.70 to 52.32)**    | 15.39 (-10.68 to 41.45)    | 0.08 (0.04 to 0.12)**           | 0.02 (-0.01 to 0.05)    |
|                                   | 2006 | 2.22 (1.66 to 2.96)**        | 1.09 (0.75 to 1.59)   | 47.24 (31.65 to 62.82)**    | 6.68 (-22.66 to 36.02)     | 0.13 (0.09 to 0.18)**           | 0.01 (-0.04 to 0.06)    |
|                                   | 2011 | 1.42 (0.94 to 2.15)          | 1.37 (0.93 to 2.02)   | 14.63 (-1.26 to 30.52)      | 17.22 (-3.09 to 37.53)     | 0.06 (-0.01 to 0.12)            | 0.05 (-0.01 to 0.10)    |
| Measles immunization              | 2014 | 1.45 (1.26 to 1.66)**        | 1.13 (0.98 to 1.29)   | 31.96 (20.87 to 43.06)**    | 10.75 (-1.64 to 23.13)     | 0.08 (0.05 to 0.10)**           | 0.02 (0.00 to 0.04)*    |
|                                   | 2000 | 1.80 (1.44 to 2.26)**        | 1.53 (1.08 to 2.16)*  | 40.93 (26.04 to 55.83)**    | 35.75 (9.02 to 62.47)**    | 0.10 (0.06 to 0.13)**           | 0.06 (0.02 to 0.11)**   |
|                                   | 2002 | 1.53 (1.35 to 1.74)**        | 1.34 (0.96 to 1.86)   | 35.75 (25.02 to 46.48)**    | 25.65 (-1.72 to 53.03)     | 0.07 (0.04 to 0.10)**           | 0.03 (0.00 to 0.06)*    |
|                                   | 2006 | 2.27 (1.89 to 2.72)**        | 1.02 (0.77 to 1.34)   | 61.23 (49.32 to 73.14)**    | 1.40 (-22.40 to 25.19)     | 0.15 (0.12 to 0.18)**           | 0.00 (-0.04 to 0.04)    |
|                                   | 2011 | 2.28 (1.82 to 2.86)**        | 1.22 (1.00 to 1.48)   | 54.00 (40.02 to 67.97)**    | 16.26 (0.42 to 32.11)*     | 0.13 (0.10 to 0.17)**           | 0.03 (0.00 to 0.06)*    |
| Full immunization                 | 2014 | 1.37 (1.19 to 1.58)**        | 1.24 (1.03 to 1.51)*  | 27.45 (16.17 to 38.73)**    | 18.63 (3.07 to 34.19)*     | 0.07 (0.04 to 0.09)**           | 0.04 (0.01 to 0.07)**   |
|                                   | 2000 | 4.55 (2.69 to 7.68)**        | 2.01 (1.08 to 3.73)*  | 45.31 (30.34 to 60.29)**    | 41.18 (6.37 to 76.00)*     | 0.23 (0.16 to 0.31)**           | 0.09 (0.01 to 0.17)*    |

| Indicators                 | Year | Relative Index of Inequality |                       | Slope Index of Inequality |                             | Concentrate Index of Inequality |                       |
|----------------------------|------|------------------------------|-----------------------|---------------------------|-----------------------------|---------------------------------|-----------------------|
|                            |      | Rural                        | Urban                 | Rural                     | Urban                       | Rural                           | Urban                 |
| Improved Water             | 2002 | 2.05 (1.58 to 2.66)**        | 1.64 (1.00 to 2.69)*  | 45.54 (29.37 to 61.71)**  | 37.50 (2.78 to 72.22)*      | 0.11 (0.07 to 0.15)**           | 0.05 (0.01 to 0.10)*  |
|                            | 2006 | 2.97 (2.04 to 4.31)**        | 1.19 (0.73 to 1.95)   | 51.71 (36.20 to 67.22)**  | 11.53 (-21.35 to 44.41)     | 0.18 (0.12 to 0.24)**           | 0.02 (-0.04 to 0.09)  |
|                            | 2011 | 1.58 (0.98 to 2.56)          | 1.75 (1.10 to 2.77)*  | 15.64 (0.47 to 30.81)*    | 26.58 (6.55 to 46.61)**     | 0.07 (-0.00 to 0.15)            | 0.08 (0.02 to 0.15)*  |
|                            | 2014 | 1.86 (1.50 to 2.31)**        | 1.47 (1.10 to 1.95)** | 44.00 (30.08 to 57.92)**  | 27.26 (8.51 to 46.02)**     | 0.11 (0.08 to 0.14)**           | 0.06 (0.02 to 0.10)** |
|                            | 2000 | 2.11 (2.05 to 2.18)**        | 1.17 (1.14 to 1.21)** | 49.65 (47.79 to 51.51)**  | 14.57 (11.98 to 17.16)**    | 0.13 (0.12 to 0.13)**           | 0.02 (0.02 to 0.03)** |
|                            | 2002 | 1.36 (1.34 to 1.38)**        | 1.18 (1.15 to 1.21)** | 28.12 (27.05 to 29.20)**  | 15.85 (13.51 to 18.18)**    | 0.06 (0.06 to 0.07)**           | 0.02 (0.02 to 0.02)** |
|                            | 2006 | 1.16 (1.13 to 1.19)**        | 1.20 (1.16 to 1.24)** | 10.86 (8.95 to 12.77)**   | 16.24 (13.58 to 18.89)**    | 0.03 (0.02 to 0.03)**           | 0.02 (0.02 to 0.03)** |
|                            | 2011 | 1.37 (1.35 to 1.38)**        | 1.07 (1.07 to 1.08)** | 28.71 (27.64 to 29.78)**  | 7.09 (6.31 to 7.87)**       | 0.07 (0.07 to 0.07)**           | 0.01 (0.01 to 0.02)** |
|                            | 2014 | 1.33 (1.32 to 1.34)**        | 1.09 (1.08 to 1.10)** | 26.40 (25.52 to 27.28)**  | 8.43 (7.61 to 9.25)**       | 0.06 (0.06 to 0.07)**           | 0.02 (0.02 to 0.02)** |
| Adequate sanitation        | 2000 | 22.03 (20.50 to 23.68)**     | 4.31 (4.00 to 4.65)** | 77.46 (76.06 to 78.87)**  | 103.94 (100.61 to 107.26)** | 0.45 (0.44 to 0.46)**           | 0.18 (0.17 to 0.18)** |
|                            | 2002 | 1.66 (1.63 to 1.69)**        | 1.42 (1.37 to 1.48)** | 40.63 (39.13 to 42.14)**  | 32.64 (29.51 to 35.78)**    | 0.08 (0.08 to 0.09)**           | 0.04 (0.04 to 0.04)** |
|                            | 2006 | 5.31 (5.14 to 5.49)**        | 1.82 (1.74 to 1.89)** | 95.71 (94.36 to 97.06)**  | 52.55 (49.55 to 55.54)**    | 0.29 (0.29 to 0.30)**           | 0.08 (0.08 to 0.09)** |
| Institutional delivery     | 2011 | 2.60 (2.55 to 2.66)**        | 1.38 (1.36 to 1.40)** | 72.32 (71.23 to 73.42)**  | 30.18 (28.79 to 31.58)**    | 0.20 (0.19 to 0.20)**           | 0.07 (0.07 to 0.07)** |
|                            | 2014 | 2.16 (2.12 to 2.20)**        | 1.36 (1.34 to 1.38)** | 63.43 (62.27 to 64.58)**  | 28.97 (27.56 to 30.38)**    | 0.20 (0.19 to 0.20)**           | 0.07 (0.07 to 0.07)** |
|                            | 2002 | 1.92 (1.75 to 2.10)**        | 1.07 (0.98 to 1.17)   | 53.41 (47.12 to 59.71)**  | 6.58 (-2.18 to 15.34)       | 0.13 (0.11 to 0.14)**           | 0.01 (-0.00 to 0.01)  |
|                            | 2006 | 2.32 (2.05 to 2.61)**        | 1.04 (0.98 to 1.10)   | 67.11 (59.03 to 75.18)**  | 4.11 (-1.51 to 9.72)        | 0.18 (0.16 to 0.21)**           | 0.01 (0.00 to 0.01)*  |
|                            | 2011 | 1.50 (1.40 to 1.60)**        | 1.07 (1.02 to 1.12)** | 36.58 (31.26 to 41.90)**  | 6.58 (2.06 to 11.10)**      | 0.11 (0.09 to 0.12)**           | 0.01 (0.00 to 0.02)** |
| Skilled birth attendance   | 2014 | 1.37 (1.30 to 1.45)**        | 1.06 (1.02 to 1.11)** | 29.23 (24.65 to 33.80)**  | 6.20 (2.45 to 9.95)**       | 0.09 (0.08 to 0.10)**           | 0.02 (0.01 to 0.02)** |
|                            | 2000 | 3.69 (2.86 to 4.76)**        | 1.26 (1.00 to 1.57)*  | 74.45 (60.87 to 88.03)**  | 21.47 (1.59 to 41.36)*      | 0.20 (0.16 to 0.24)**           | 0.03 (0.01 to 0.05)*  |
|                            | 2002 | 1.55 (1.44 to 1.68)**        | 1.11 (1.00 to 1.23)*  | 36.96 (32.05 to 41.87)**  | 10.22 (0.45 to 19.99)*      | 0.11 (0.09 to 0.12)**           | 0.01 (0.00 to 0.02)** |
|                            | 2006 | 2.80 (2.34 to 3.36)**        | 1.15 (0.97 to 1.37)   | 66.87 (56.68 to 77.07)**  | 13.00 (-2.25 to 28.24)      | 0.18 (0.15 to 0.21)**           | 0.02 (-0.00 to 0.04)  |
|                            | 2011 | 1.47 (1.37 to 1.57)**        | 1.05 (1.01 to 1.09)*  | 34.90 (29.66 to 40.13)**  | 4.73 (0.78 to 8.68)*        | 0.10 (0.09 to 0.12)**           | 0.01 (0.00 to 0.02)** |
| Care seeking for pneumonia | 2014 | 1.31 (1.25 to 1.38)**        | 1.06 (1.02 to 1.10)** | 25.58 (21.24 to 29.92)**  | 5.57 (2.01 to 9.13)**       | 0.08 (0.07 to 0.09)**           | 0.02 (0.01 to 0.02)** |
|                            | 2000 | 0.81 (0.58 to 1.12)          | 1.03 (0.43 to 2.47)   | -13.28 (-33.78 to 7.22)   | 1.71 (-51.95 to 55.37)      | -0.03 (-0.08 to 0.02)           | 0.00 (-0.13 to 0.14)  |
|                            | 2002 | 1.15 (0.94 to 1.41)          | 0.98 (0.65 to 1.49)   | 11.77 (-5.43 to 28.96)    | -1.52 (-39.52 to 36.47)     | 0.02 (-0.01 to 0.05)            | -0.00 (-0.05 to 0.05) |
|                            | 2006 | 1.29 (0.95 to 1.76)          | NA                    | 18.23 (-4.86 to 41.33)    | NA                          | 0.03 (-0.02 to 0.08)            | NA                    |
|                            | 2011 | 0.93 (0.65 to 1.34)          | 0.92 (0.45 to 1.86)   | -5.72 (-35.11 to 23.67)   | -6.54 (-55.97 to 42.89)     | -0.01 (-0.07 to 0.04)           | -0.02 (-0.13 to 0.10) |
| ARI treatment              | 2014 | 1.26 (0.93 to 1.71)          | 1.36 (1.00 to 1.84)*  | 20.68 (-4.83 to 46.20)    | 27.54 (2.33 to 52.74)*      | 0.05 (0.00 to 0.10)*            | 0.03 (-0.03 to 0.08)  |
|                            | 2006 | 0.87 (0.50 to 1.50)          | NA                    | -7.11 (-34.53 to 20.32)   | NA                          | -0.02 (-0.11 to 0.06)           | NA                    |
|                            | 2011 | 2.20 (1.32 to 3.68)**        | 1.13 (0.51 to 2.50)   | 51.92 (19.86 to 83.97)**  | 7.18 (-44.31 to 58.66)      | 0.12 (0.04 to 0.21)**           | 0.02 (-0.11 to 0.14)  |
|                            | 2014 | 1.42 (0.97 to 2.08)          | 1.00 (0.74 to 1.35)   | 28.69 (-1.01 to 58.39)    | 0.31 (-27.55 to 28.17)      | 0.06 (-0.00 to 0.12)            | 0.00 (-0.05 to 0.05)  |
| Oral rehydration therapy   | 2000 | 1.34 (0.92 to 1.95)          | 1.85 (0.66 to 5.24)   | 15.96 (-4.80 to 36.72)    | 32.62 (-23.54 to 88.78)     | 0.04 (-0.01 to 0.09)            | 0.09 (-0.07 to 0.24)  |
|                            | 2002 | 2.27 (1.04 to 4.93)*         | NA                    | 28.05 (-2.61 to 58.70)    | NA                          | 0.11 (-0.01 to 0.23)            | NA                    |
|                            | 2006 | 0.90 (0.61 to 1.33)          | 1.96 (0.47 to 8.23)   | -6.88 (-32.67 to 18.92)   | 39.86 (-36.47 to 116.20)    | -0.01 (-0.07 to 0.04)           | 0.09 (-0.09 to 0.27)  |
|                            | 2011 | 2.09 (0.93 to 4.69)          | 0.95 (0.27 to 3.34)   | 23.44 (-0.13 to 47.01)    | -1.22 (-38.93 to 36.50)     | 0.12 (-0.01 to 0.24)            | -0.01 (-0.20 to 0.18) |
|                            | 2014 | 2.63 (1.17 to 5.90)*         | 1.72 (0.70 to 4.23)   | 25.33 (2.85 to 47.81)*    | 21.15 (-14.54 to 56.84)     | 0.14 (0.02 to 0.25)*            | 0.09 (-0.06 to 0.23)  |

Note: \*\*\*, \*\*, \* Statistically significant results with P<0.001, P<0.01, and P<0.05, respectively; RII=Relative Index of Inequality; SII=Slope Index of Inequality; CNI=Concentrate Index of Inequality; CI=Confidence Interval;



**Table S18: Changes in inequality of RMNCH service coverage in Vietnam (2000–2014)**

| Indicators                         | Changes in Socioeconomic Inequality |                             |                          | Changes in Regional Inequality |                             |                          | Changes in Urban-Rural Inequality |                             |                          |
|------------------------------------|-------------------------------------|-----------------------------|--------------------------|--------------------------------|-----------------------------|--------------------------|-----------------------------------|-----------------------------|--------------------------|
|                                    | RII (95% CI)                        | SII (95% CI)                | CnI (95% CI)             | RII (95% CI)                   | SII (95% CI)                | CnI (95% CI)             | RII (95% CI)                      | SII (95% CI)                | CnI (95% CI)             |
| <b>Prevention Indicators</b>       |                                     |                             |                          |                                |                             |                          |                                   |                             |                          |
| At least one ANC visit             | -1.30 (-1.46 to -1.14)***           | -55.17 (-63.25 to 47.09)*** | -0.13 (-0.15 to 0.11)*** | -1.12 (-1.28 to 0.96)***       | -48.80 (-58.79 to 38.81)*** | -0.11 (-0.13 to 0.09)*** | -1.06 (-1.22 to 0.90)***          | -49.01 (-61.41 to 36.61)*** | -0.04 (-0.06 to 0.02)*** |
| At least four ANC visit†           | -5.24 (-5.57 to 4.91)***            | 21.18 (11.38 to 30.98)***   | -0.11 (-0.15 to 0.07)*** | -1.82 (-2.13 to 1.51)***       | 15.81 (4.72 to 26.90)**     | -0.07 (-0.11 to 0.03)**  | -3.06 (-3.39 to 2.73)***          | -15.27 (-32.13 to 1.59)     | -0.09 (-0.13 to 0.05)*** |
| Exclusive breastfeeding            | -0.33 (-1.46 to 0.80)               | -13.62 (-34.46 to 7.22)     | -0.12 (-0.29 to 0.05)    | -14.19 (-15.42 to 12.96)*      | -6.13 (-21.44 to 9.18)      | -0.18 (-0.35 to 0.01)*   | -0.01 (-1.82 to 1.80)             | -3.28 (-29.94 to 23.38)     | -0.04 (-0.18 to 0.10)    |
| Early initiation of breastfeeding† | -0.28 (-0.55 to 0.01)*              | -14.49 (-27.04 to 1.94)*    | -0.06 (-0.10 to 0.02)**  | -0.30 (-0.57 to 0.03)          | -18.54 (-31.09 to 5.99)**   | -0.04 (-0.08 to 0.00)    | -0.13 (-0.48 to 0.22)             | -2.49 (-19.35 to 14.37)     | -0.03 (-0.06 to 0.00)*   |
| Family planning needs satisfied†   | 0.14 (0.04 to 0.24)**               | 12.32 (6.78 to 17.86)***    | 0.02 (-0.01 to 0.05)     | -0.12 (-0.22 to 0.02)*         | -8.18 (-13.72 to 2.64)**    | -0.02 (-0.05 to 0.01)    | 0.00 (-0.13 to 0.13)              | 1.42 (-6.90 to 9.74)        | 0.00 (-0.02 to 0.02)     |
| BCG immunization                   | -0.30 (-0.39 to 0.21)***            | -19.80 (-26.87 to 12.73)*** | -0.02 (-0.04 to 0.00)*   | -0.18 (-0.29 to 0.07)**        | -12.50 (-23.05 to 1.95)*    | -0.03 (-0.05 to 0.01)**  | -0.24 (-0.35 to 0.13)***          | -17.18 (-28.61 to 5.75)**   | -0.01 (-0.03 to 0.01)    |
| DPT3 immunization                  | -1.57 (-1.88 to 1.26)***            | -25.25 (-42.11 to 8.39)**   | -0.10 (-0.14 to 0.06)*** | -1.49 (-1.81 to 1.17)***       | -23.97 (-40.83 to 7.11)**   | -0.11 (-0.15 to 0.07)*** | -1.69 (-2.04 to 1.34)***          | -49.86 (-72.72 to 27.00)*** | -0.07 (-0.11 to 0.03)**  |
| Polio3 immunization                | -2.48 (-2.77 to 2.19)***            | -43.17 (-58.97 to 27.37)*** | -0.15 (-0.19 to 0.11)*** | -1.37 (-1.68 to 1.06)***       | -26.46 (-42.26 to 10.66)**  | -0.12 (-0.16 to 0.08)*** | -2.41 (-2.71 to 2.11)***          | -60.32 (-80.50 to 40.14)*** | -0.09 (-0.13 to 0.05)*** |
| Measles immunization               | -0.66 (-0.87 to 0.45)***            | -26.42 (-41.73 to 11.11)*** | -0.06 (-0.10 to 0.02)**  | -0.32 (-0.52 to 0.12)*         | -9.70 (-23.83 to 4.43)      | -0.03 (-0.07 to 0.01)    | -0.64 (-0.90 to 0.38)***          | -36.17 (-57.37 to 14.97)*** | -0.04 (-0.07 to 0.01)**  |
| Full immunization                  | -4.09 (-4.54 to 3.64)***            | -26.12 (-44.19 to 8.05)**   | -0.18 (-0.24 to 0.12)*** | -2.52 (-2.96 to 2.08)***       | -15.47 (-32.10 to 1.16)     | -0.15 (-0.21 to 0.09)*** | -3.70 (-4.16 to 3.24)***          | -63.51 (-89.07 to 37.95)*** | -0.13 (-0.17 to 0.09)*** |
| Improved Water                     | -0.99 (-1.01 to 0.97)***            | -37.62 (-39.58 to 35.66)*** | -0.09 (-0.09 to 0.09)*** | -0.97 (-0.99 to 0.95)***       | -39.49 (-41.45 to 37.53)*** | -0.12 (-0.12 to 0.12)*** | -0.95 (-0.98 to 0.92)***          | -39.72 (-41.68 to 37.76)*** | -0.05 (-0.05 to 0.05)*** |
| Adequate sanitation                | -17.57 (-17.63 to 17.51)***         | -52.74 (-54.70 to 50.78)*** | -0.29 (-0.29 to 0.29)*** | -3.71 (-3.75 to 3.67)***       | -17.72 (-20.49 to 14.95)*** | -0.16 (-0.16 to 0.16)*** | -5.67 (-5.71 to 5.63)***          | -57.58 (-60.35 to 54.81)*** | -0.16 (-0.16 to 0.16)*** |
| <b>Treatment Indicators</b>        |                                     |                             |                          |                                |                             |                          |                                   |                             |                          |
| Institutional delivery†            | -0.56 (-0.65 to 0.47)***            | -28.19 (-35.26 to 21.12)*** | -0.05 (-0.07 to 0.03)*** | -0.48 (-0.57 to 0.39)***       | -25.89 (-32.96 to 18.82)*** | -0.06 (-0.08 to 0.04)*** | -0.45 (-0.55 to 0.35)***          | -24.61 (-31.68 to 17.54)*** | -0.02 (-0.04 to 0.00)*   |
| Skilled birth attendance           | -2.26 (-2.44 to 2.08)***            | -64.15 (-74.70 to 53.60)*** | -0.15 (-0.19 to 0.11)*** | -1.84 (-2.04 to 1.64)***       | -58.60 (-69.15 to 48.05)*** | -0.17 (-0.21 to 0.13)*** | -1.86 (-2.06 to 1.66)***          | -62.69 (-75.09 to 50.29)*** | -0.06 (-0.08 to 0.04)*** |
| Care seeking for pneumonia         | 0.39 (0.01 to 0.77)                 | 28.70 (0.98 to 56.42)*      | 0.06 (0.00 to 0.12)*     | -0.75 (-1.07 to 0.43)**        | -18.79 (-41.14 to 3.56)     | -0.05 (-0.11 to 0.01)    | 0.18 (-0.40 to 0.76)              | 14.34 (-24.86 to 53.54)     | 0.01 (-0.03 to 0.05)     |
| ARI treatment‡                     | 0.24 (-0.31 to 0.79)                | 20.82 (-12.56 to 54.20)     | 0.04 (-0.05 to 0.13)     | -0.92 (-1.43 to 0.41)          | -8.57 (-35.80 to 18.66)     | -0.07 (-0.16 to 0.02)    | 0.44 (-0.35 to 1.23)              | 31.03 (-13.02 to 75.08)     | 0.04 (-0.03 to 0.11)     |
| Oral rehydration therapy           | 1.43 (0.73 to 2.13)*                | 14.84 (-12.88 to 42.56)     | 0.11 (-0.00 to 0.22)     | 0.88 (0.19 to 1.57)            | 0.56 (-24.39 to 25.51)      | 0.07 (-0.04 to 0.18)     | 1.30 (0.41 to 2.19)               | 21.13 (-19.65 to 61.91)     | 0.09 (0.00 to 0.18)*     |

\*\*\*, \*\*, \* Statistically significant results with P<0.001, P<0.01, and P<0.05, respectively; † data in the year 2002 was used due to unavailable data for 2000; ‡ data in the year 2006 was used due to unavailable data for 2000; RII=Relative Index of Inequality; SII=Slope Index of Inequality; CnI=Concentrate Index of Inequality; CI=Confidence Interval; The inequality analyses of UHC indicators at national and subnational levels during 2000–2014 are presented in the Supplementary.

**Table S19: Changes in Socioeconomic inequality in RMNCH service, 2000-2014, stratifying by living areas**

| Indicators                         | Changes in Socioeconomic Inequality in Rural Area |                              |                           | Changes in Socioeconomic Inequality in Urban Area |                              |                           |
|------------------------------------|---------------------------------------------------|------------------------------|---------------------------|---------------------------------------------------|------------------------------|---------------------------|
|                                    | RII                                               | SII                          | CnI                       | RII                                               | SII                          | CnI                       |
| At least one ANC visit             | -1.32 (-1.52 to -1.12)***                         | -48.49 (-60.89 to -36.09)*** | -0.11 (-0.15 to -0.07)*** | -0.23 (-0.45 to -0.01)                            | -18.19 (-38.18 to 1.80)      | -0.02 (-0.04 to -0.00)*   |
| At least four ANC visit†           | -2.70 (-3.12 to -2.28)**                          | 41.13 (30.04 to 52.22)***    | -0.05 (-0.11 to 0.01)     | -2.08 (-2.78 to -1.38)*                           | -6.66 (-32.14 to 18.82)      | -0.01 (-0.07 to 0.05)     |
| Exclusive breastfeeding            | -0.62 (-1.90 to 0.66)*                            | -28.34 (-53.29 to -3.39)*    | -0.19 (-0.37 to -0.01)*   | 0.54 (-2.52 to 3.60)                              | 12.21 (-34.25 to 58.67)      | 0.14 (-0.31 to 0.59)      |
| Early initiation of breastfeeding† | -0.28 (-0.59 to 0.03)                             | -15.39 (-30.70 to -0.08)*    | -0.05 (-0.09 to -0.01)*   | -0.40 (-1.03 to 0.23)                             | -19.51 (-48.45 to 9.43)      | -0.07 (-0.15 to 0.01)     |
| Family planning needs satisfied†   | 0.13 (0.00 to 0.26)*                              | 10.91 (2.59 to 19.23)*       | 0.02 (-0.01 to 0.05)      | 0.37 (0.16 to 0.58)***                            | 25.12 (10.99 to 39.25)***    | 0.05 (0.02 to 0.08)***    |
| BCG immunization                   | -0.19 (-0.34 to -0.04)*                           | -11.27 (-23.67 to 1.13)      | -0.01 (-0.04 to 0.02)     | -0.05 (-0.17 to 0.07)                             | -4.55 (-16.95 to 7.85)       | 0.00 (-0.02 to 0.02)      |
| DPT3 immunization                  | -1.10 (-1.49 to -0.71)*                           | -7.35 (-26.95 to 12.25)      | -0.07 (-0.13 to -0.01)*   | -0.25 (-0.75 to 0.25)                             | -9.25 (-44.31 to 25.81)      | -0.01 (-0.08 to 0.06)     |
| Polio3 immunization                | -2.02 (-2.42 to -1.62)***                         | -24.16 (-43.76 to -4.56)*    | -0.11 (-0.17 to -0.05)*** | -0.18 (-0.56 to 0.20)                             | -10.02 (-39.87 to 19.83)     | -0.01 (-0.07 to 0.05)     |
| Measles immunization               | -0.43 (-0.69 to -0.17)*                           | -13.48 (-33.08 to 6.12)      | -0.03 (-0.07 to 0.01)     | -0.29 (-0.69 to 0.11)                             | -17.12 (-48.72 to 14.48)     | -0.02 (-0.06 to 0.02)     |
| Full immunization                  | -2.69 (-3.26 to -2.12)**                          | -1.31 (-22.15 to 19.53)      | -0.12 (-0.21 to -0.03)**  | -0.54 (-1.23 to 0.15)                             | -13.92 (-54.28 to 26.44)     | -0.03 (-0.12 to 0.06)     |
| Improved Water                     | -0.78 (-0.82 to -0.74)***                         | -23.25 (-25.21 to -21.29)*** | -0.07 (-0.07 to -0.07)*** | -0.08 (-0.10 to -0.06)***                         | -6.14 (-8.10 to -4.18)***    | 0.00 (0.00 to 0.00)NA     |
| Adequate sanitation                | -19.87 (-19.95 to -19.79)***                      | -14.03 (-16.80 to -11.26)*** | -0.25 (-0.25 to -0.25)*** | -2.95 (-3.03 to -2.87)***                         | -74.97 (-79.35 to -70.59)*** | -0.11 (-0.11 to -0.11)*** |
| Institutional delivery†            | -0.55 (-0.66 to -0.44)***                         | -24.18 (-31.25 to -17.11)*** | -0.04 (-0.07 to -0.01)**  | -0.01 (-0.12 to 0.10)                             | -0.38 (-9.15 to 8.39)        | 0.01 (0.01 to 0.01)***    |
| Skilled birth attendance           | -2.38 (-2.64 to -2.12)***                         | -48.87 (-63.14 to -34.60)*** | -0.12 (-0.16 to -0.08)*** | -0.20 (-0.42 to 0.02)                             | -15.90 (-35.89 to 4.09)      | -0.01 (-0.03 to 0.01)     |
| Care seeking for pneumonia         | 0.45 (0.01 to 0.89)                               | 33.96 (1.81 to 66.11)*       | 0.08 (-0.00 to 0.16)      | 0.33 (-0.60 to 1.26)                              | 25.83 (-32.90 to 84.56)      | 0.03 (-0.12 to 0.18)      |
| Oral rehydration therapy           | 1.29 (0.40 to 2.18)                               | 9.37 (-21.12 to 39.86)       | 0.10 (-0.03 to 0.23)      | -0.13 (-1.51 to 1.25)                             | -11.47 (-78.37 to 55.43)     | 0.00 (-0.21 to 0.21)      |

Note: \*\*\*, \*\*, \* Statistically significant results with P<0.001, P<0.01, and P<0.05, respectively; RII=Relative Index of Inequality; SII=Slope Index of Inequality; CnI=Concentrate Index of Inequality; CI=Confidence Interval;

**Table S20: Sensitivity analysis of change in trends by matching DHS recall periods**

| Indicators                        | MICS and unmatched-DHS recall period |       |                  | MICS and matched-DHS recall period |       |                 |
|-----------------------------------|--------------------------------------|-------|------------------|------------------------------------|-------|-----------------|
|                                   | Slope                                | SE    | 95% CrI          | Slope                              | SE    | 95% CrI         |
| At least one ANC visit            | 0.116                                | 0.009 | 0.099 to 0.134   | 0.120                              | 0.009 | 0.103 to 0.138  |
| At least four ANC visit           | 0.140                                | 0.007 | 0.126 to 0.153   | 0.135                              | 0.007 | 0.121 to 0.148  |
| Early initiation of breastfeeding | -0.021                               | 0.006 | -0.032 to -0.009 | -0.009                             | 0.006 | -0.022 to 0.003 |
| Skilled birth attendance          | 0.103                                | 0.007 | 0.089 to 0.118   | 0.111                              | 0.007 | 0.098 to 0.126  |
| Institutional delivery            | 0.090                                | 0.008 | 0.074 to 0.107   | 0.093                              | 0.009 | 0.077 to 0.111  |

Note: CrI=Credibal Interval; SE=Estiamted Standard Error;

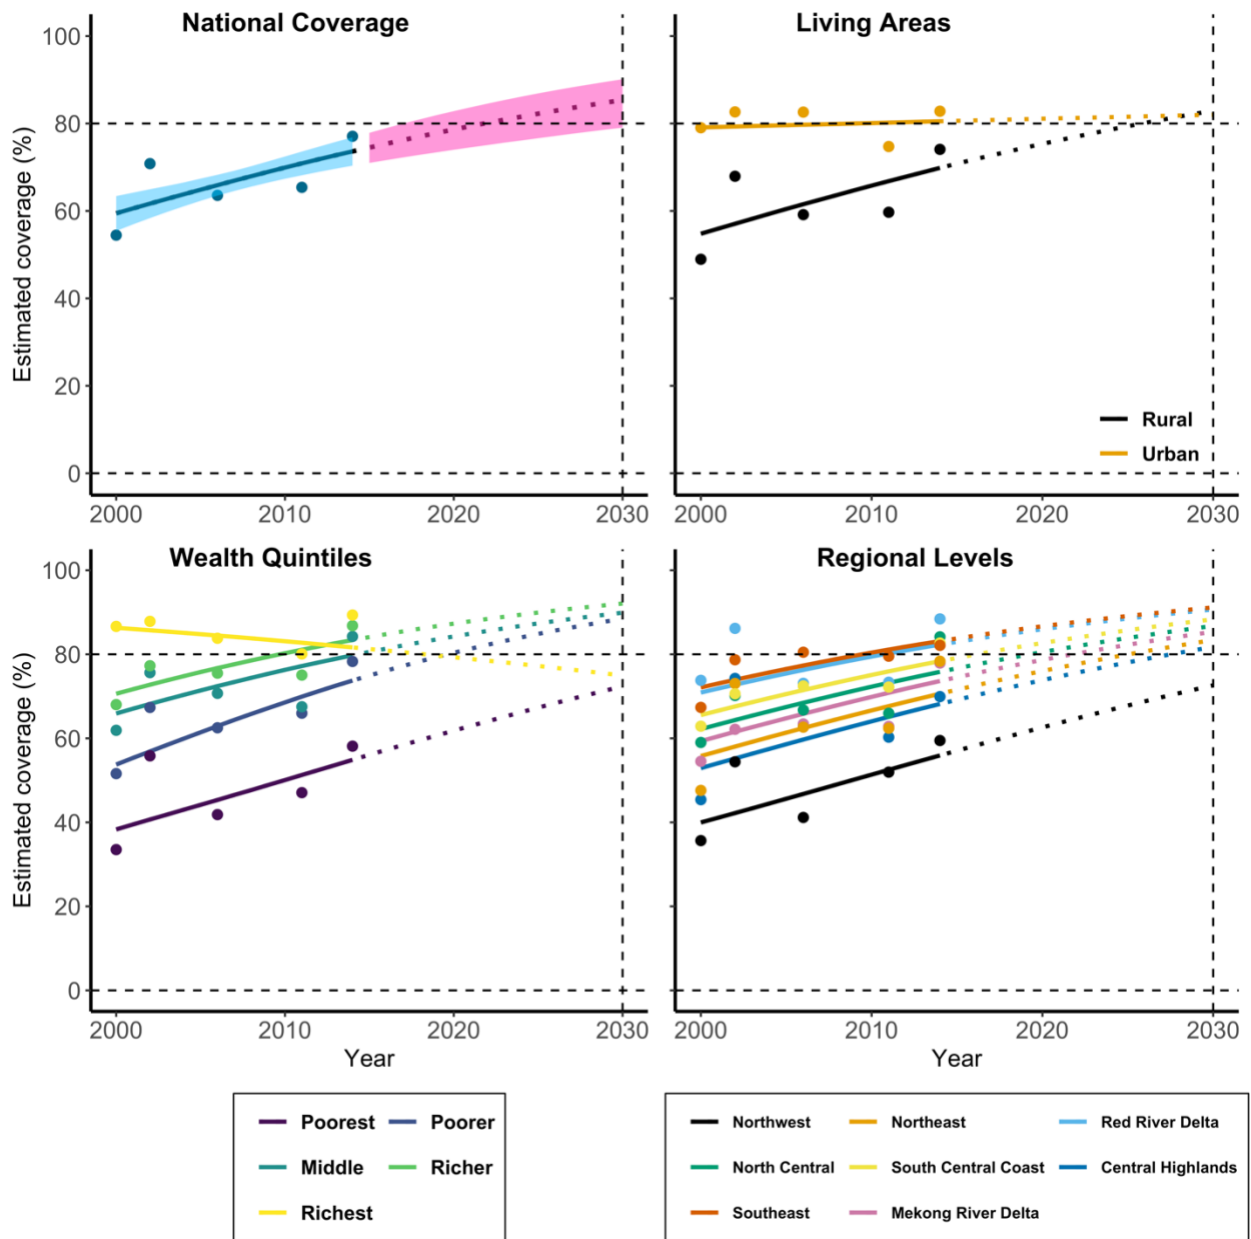

**Fig. S1: Trends in and projections of coverage of composite prevention index**

Notes: The coloured dots are the observed coverages; The solid lines are the estimated trends to 2014; The dashed lines are the projected trends in future from 2014; The shaded areas are the 95% Credible Intervals; the horizontal dotted lines present the UHC target of 80%.

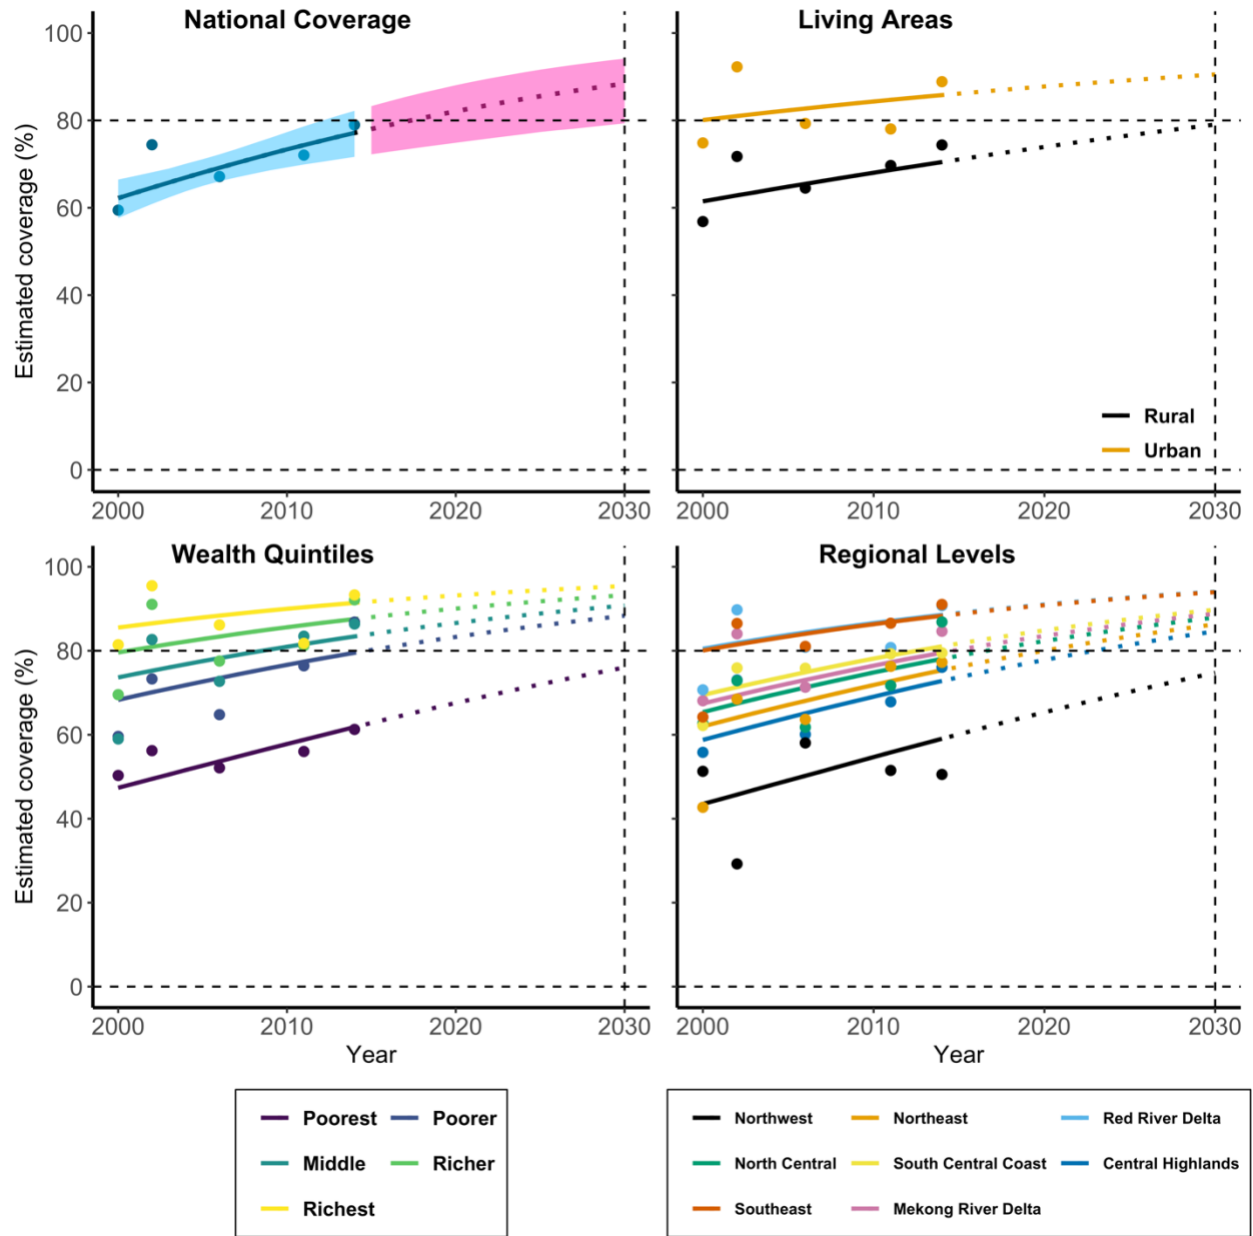

**Fig. S2: Trends in and projections of coverage of composite treatment index**

Notes: The coloured dots are the observed coverages; The solid lines are the estimated trends to 2014; The dashed lines are the projected trends in future from 2014; The shaded areas are the 95% Credible Intervals; the horizontal dotted lines present the UHC target of 80%.

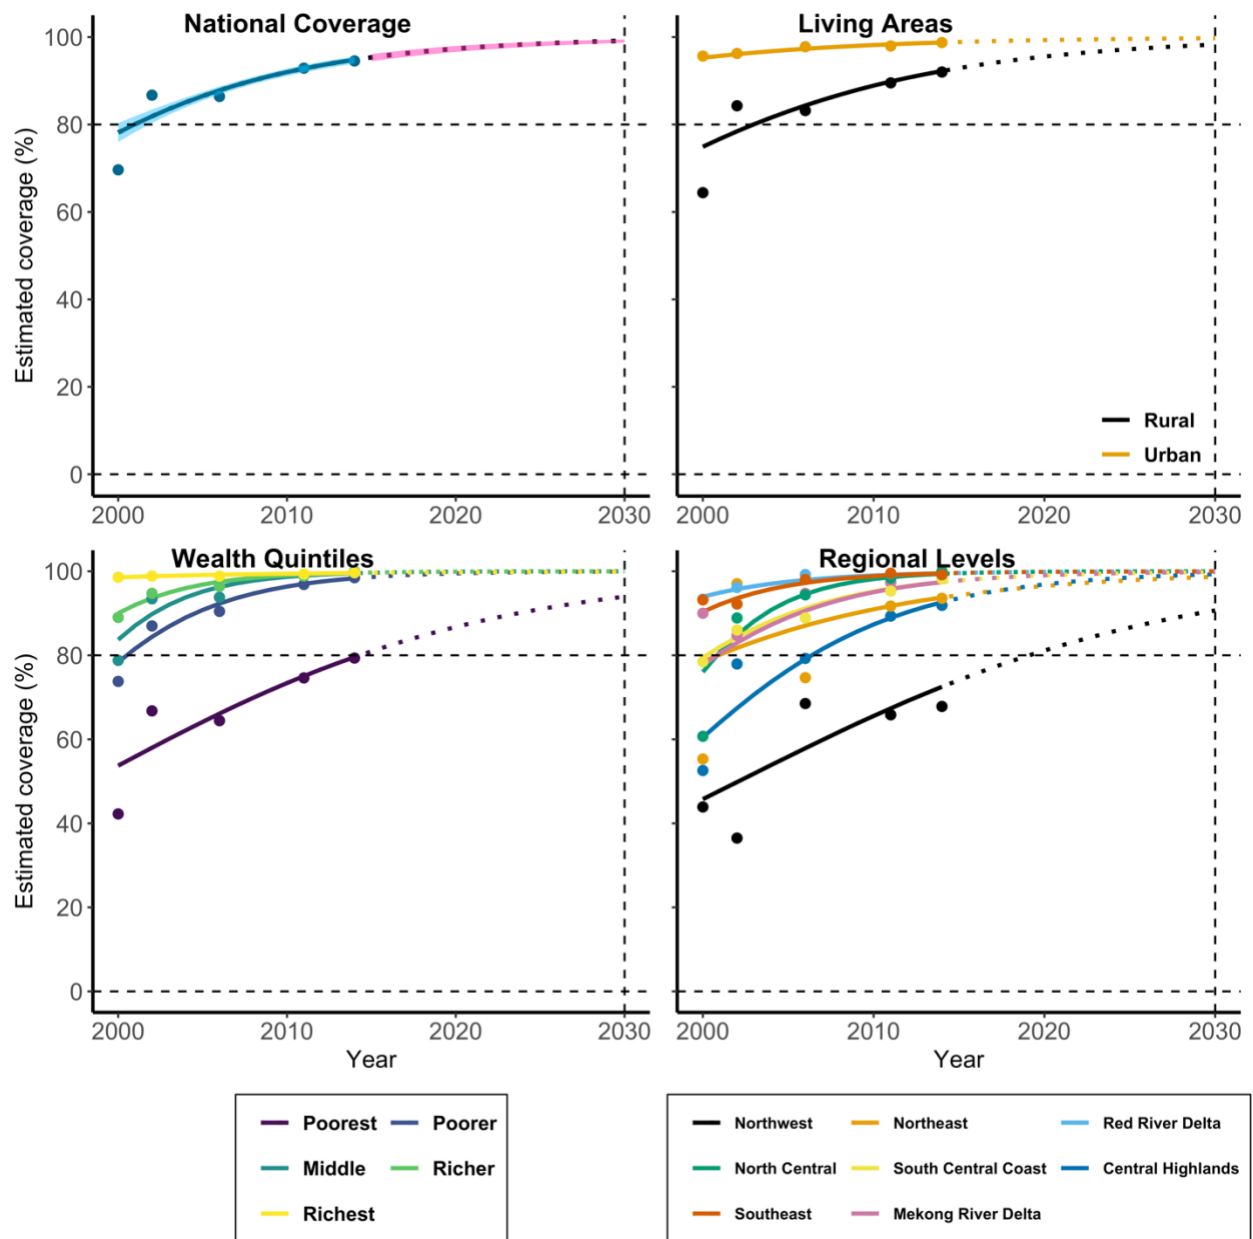

**Fig. S3: Trends in and projections of coverage of at least one ANC visit**

Notes: The coloured dots are the observed coverages; The solid lines are the estimated trends to 2014; The dashed lines are the projected trends in future from 2014; The shaded areas are the 95% Credible Intervals; the horizontal dotted lines present the UHC target of 80%.

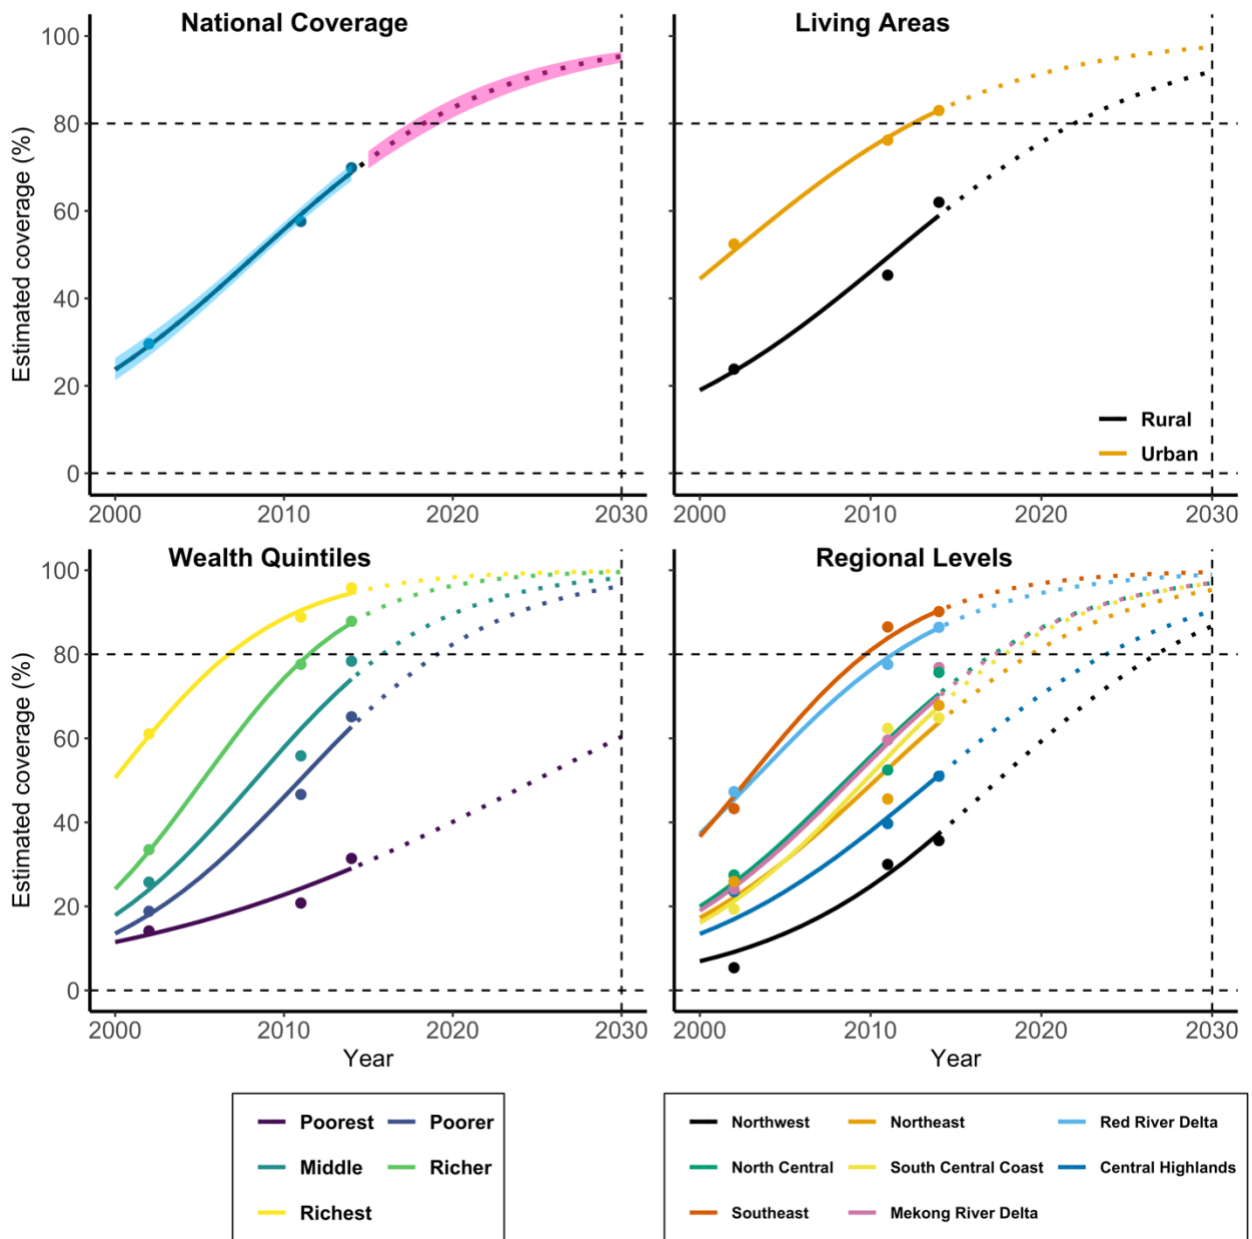

**Fig. S4: Trends in and projections of coverage of at least four ANC visit**

Notes: The coloured dots are the observed coverages; The solid lines are the estimated trends to 2014; The dashed lines are the projected trends in future from 2014; The shaded areas are the 95% Credible Intervals; the horizontal dotted lines present the UHC target of 80%.

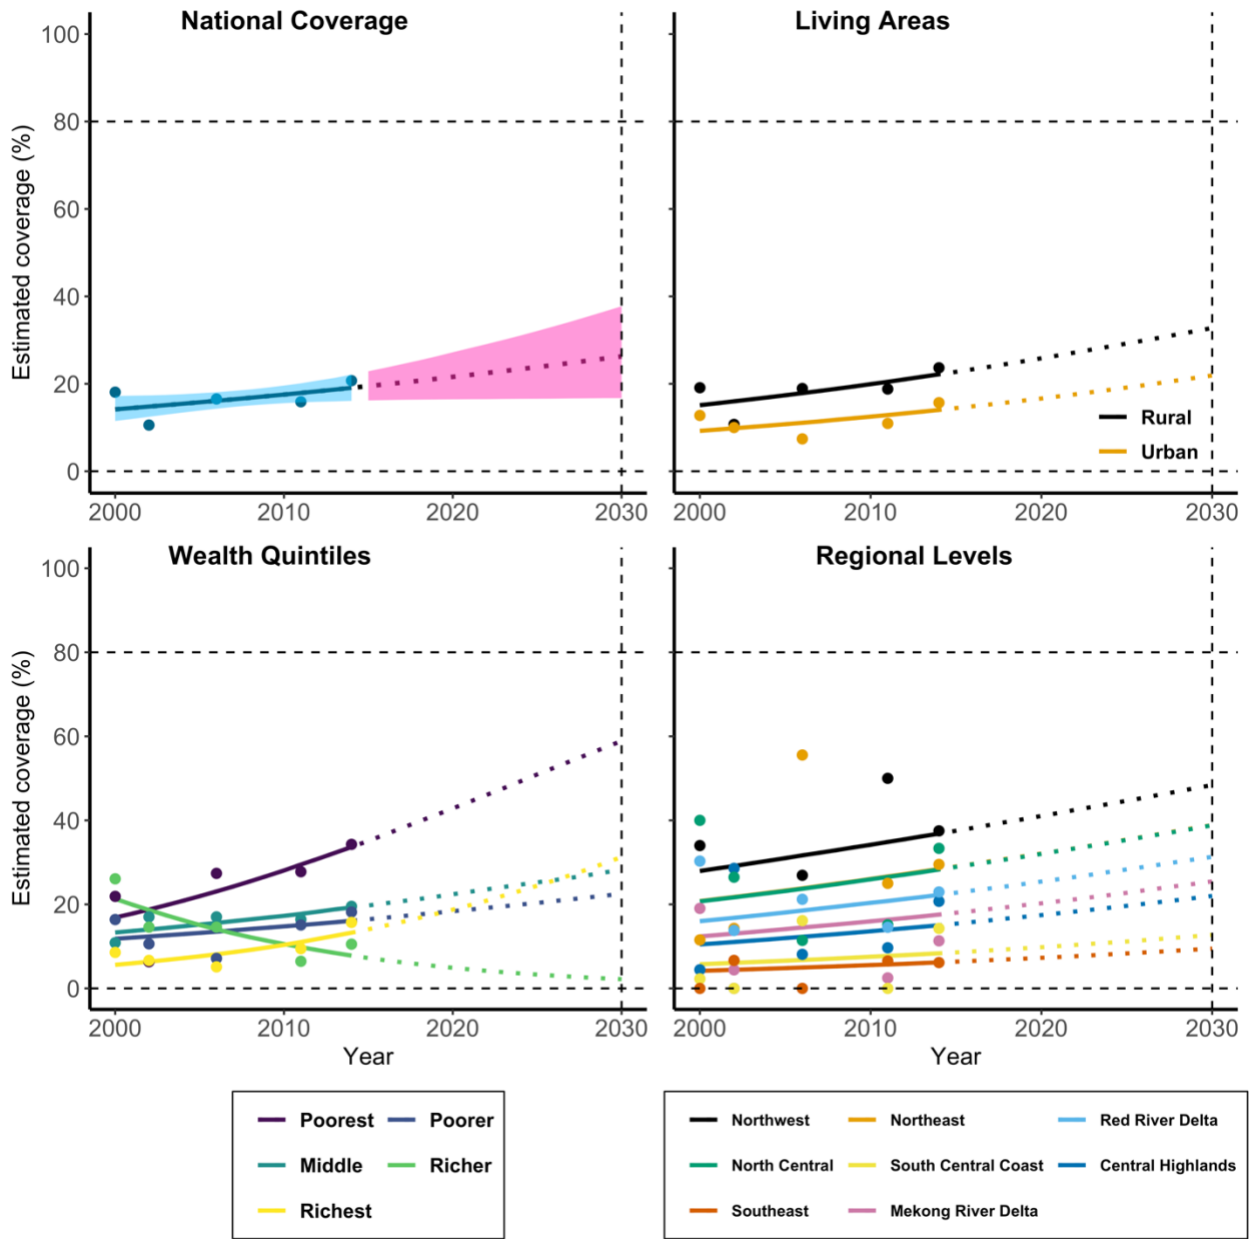

**Fig. S5: Trends in and projections of coverage of Exclusive breastfeeding**

Notes: The coloured dots are the observed coverages; The solid lines are the estimated trends to 2014; The dashed lines are the projected trends in future from 2014; The shaded areas are the 95% Credible Intervals; the horizontal dotted lines present the UHC target of 80%.



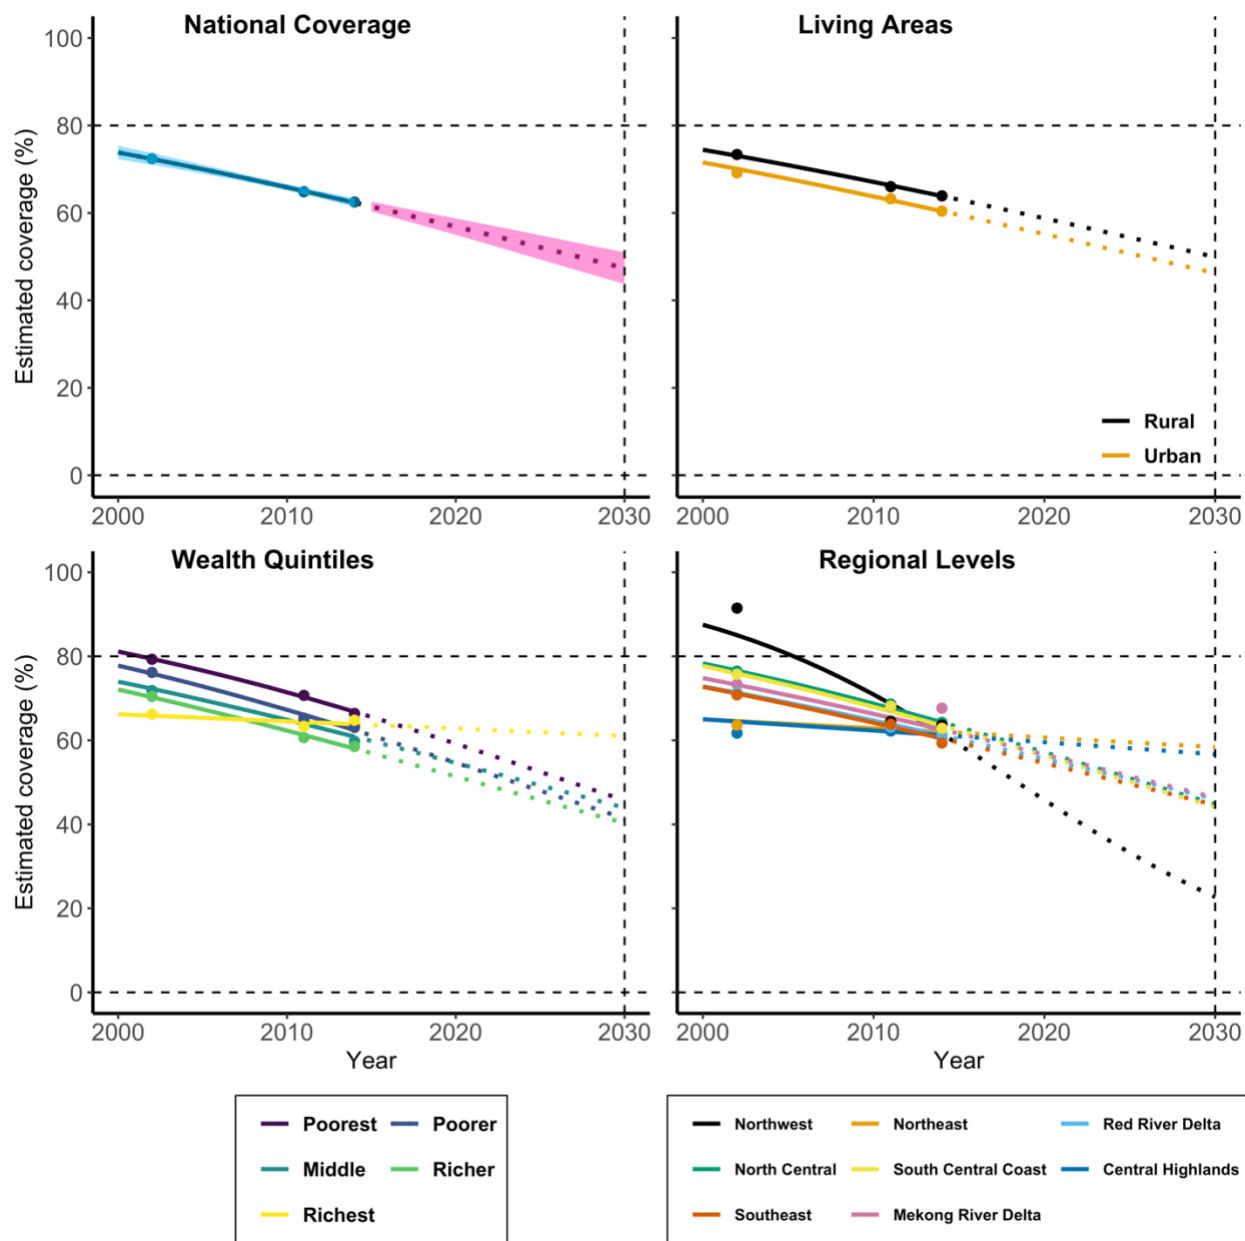

**Fig. S6: Trends in and projections of coverage of Family planning needs satisfied**

Notes: The coloured dots are the observed coverages; The solid lines are the estimated trends to 2014; The dashed lines are the projected trends in future from 2014; The shaded areas are the 95% Credible Intervals; the horizontal dotted lines present the UHC target of 80%.

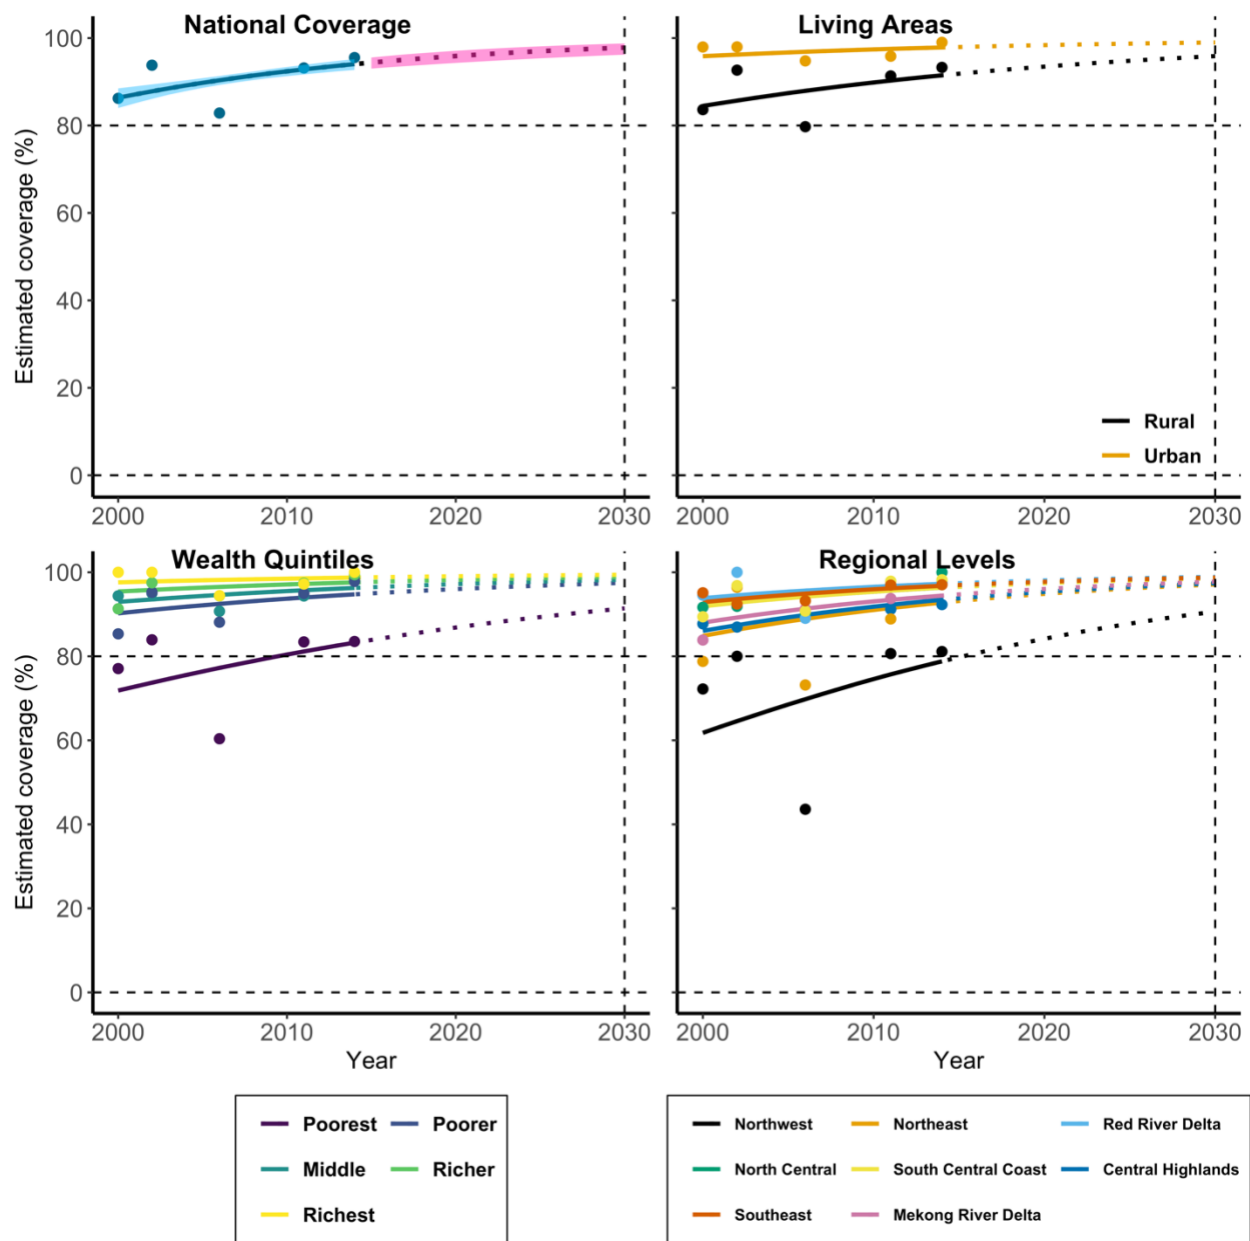

**Fig. S7: Trends in and projections of coverage of BCG Immunization**

Notes: The coloured dots are the observed coverages; The solid lines are the estimated trends to 2014; The dashed lines are the projected trends in future from 2014; The shaded areas are the 95% Credible Intervals; the horizontal dotted lines present the UHC target of 80%.

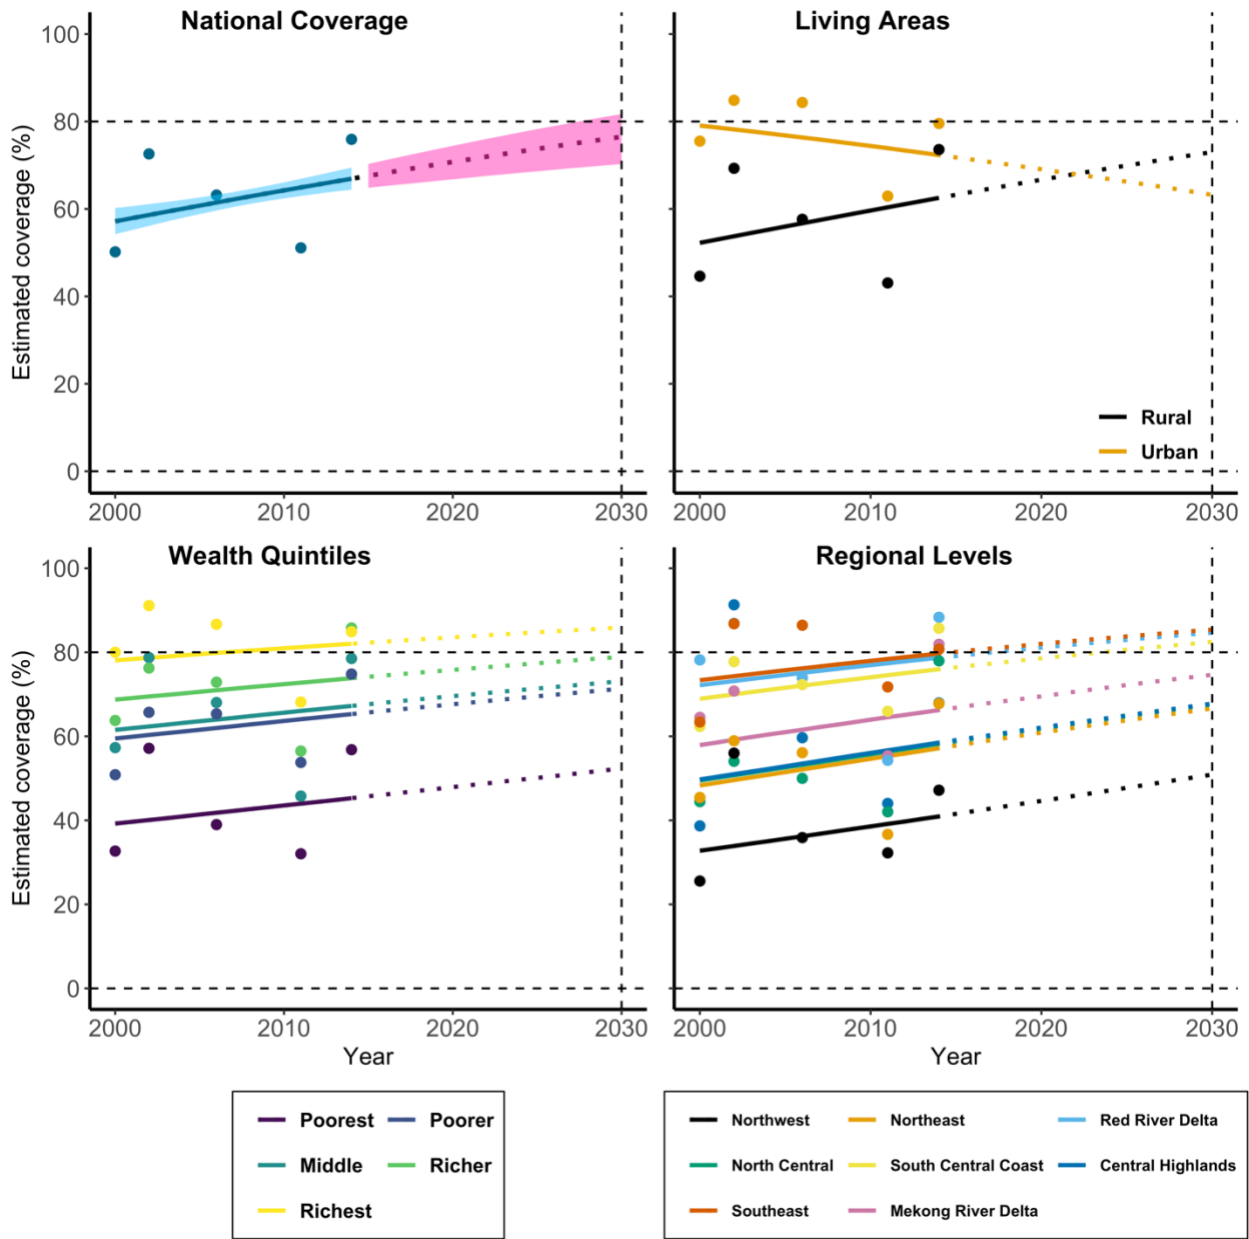

**Fig. S8: Trends in and projections of coverage of DPT3 Immunization**

Notes: The coloured dots are the observed coverages; The solid lines are the estimated trends to 2014; The dashed lines are the projected trends in future from 2014; The shaded areas are the 95% Credible Intervals; the horizontal dotted lines present the UHC target of 80%.

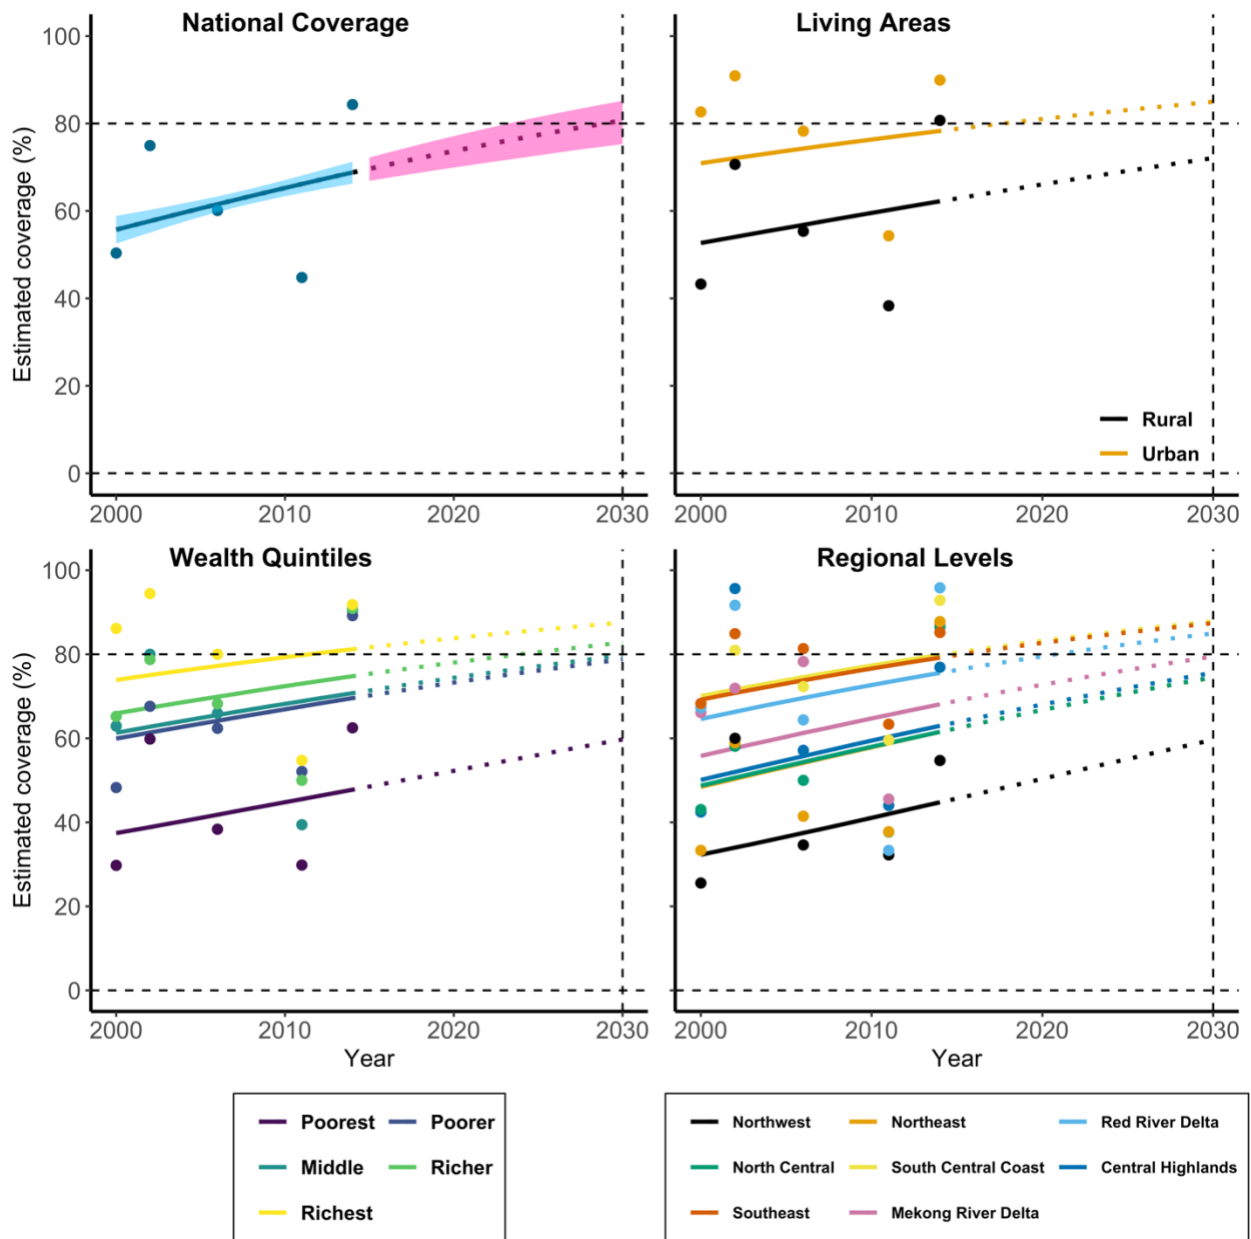

**Fig. S9: Trends in and projections of coverage of Polio3 Immunization**

Notes: The coloured dots are the observed coverages; The solid lines are the estimated trends to 2014; The dashed lines are the projected trends in future from 2014; The shaded areas are the 95% Credible Intervals; the horizontal dotted lines present the UHC target of 80%.

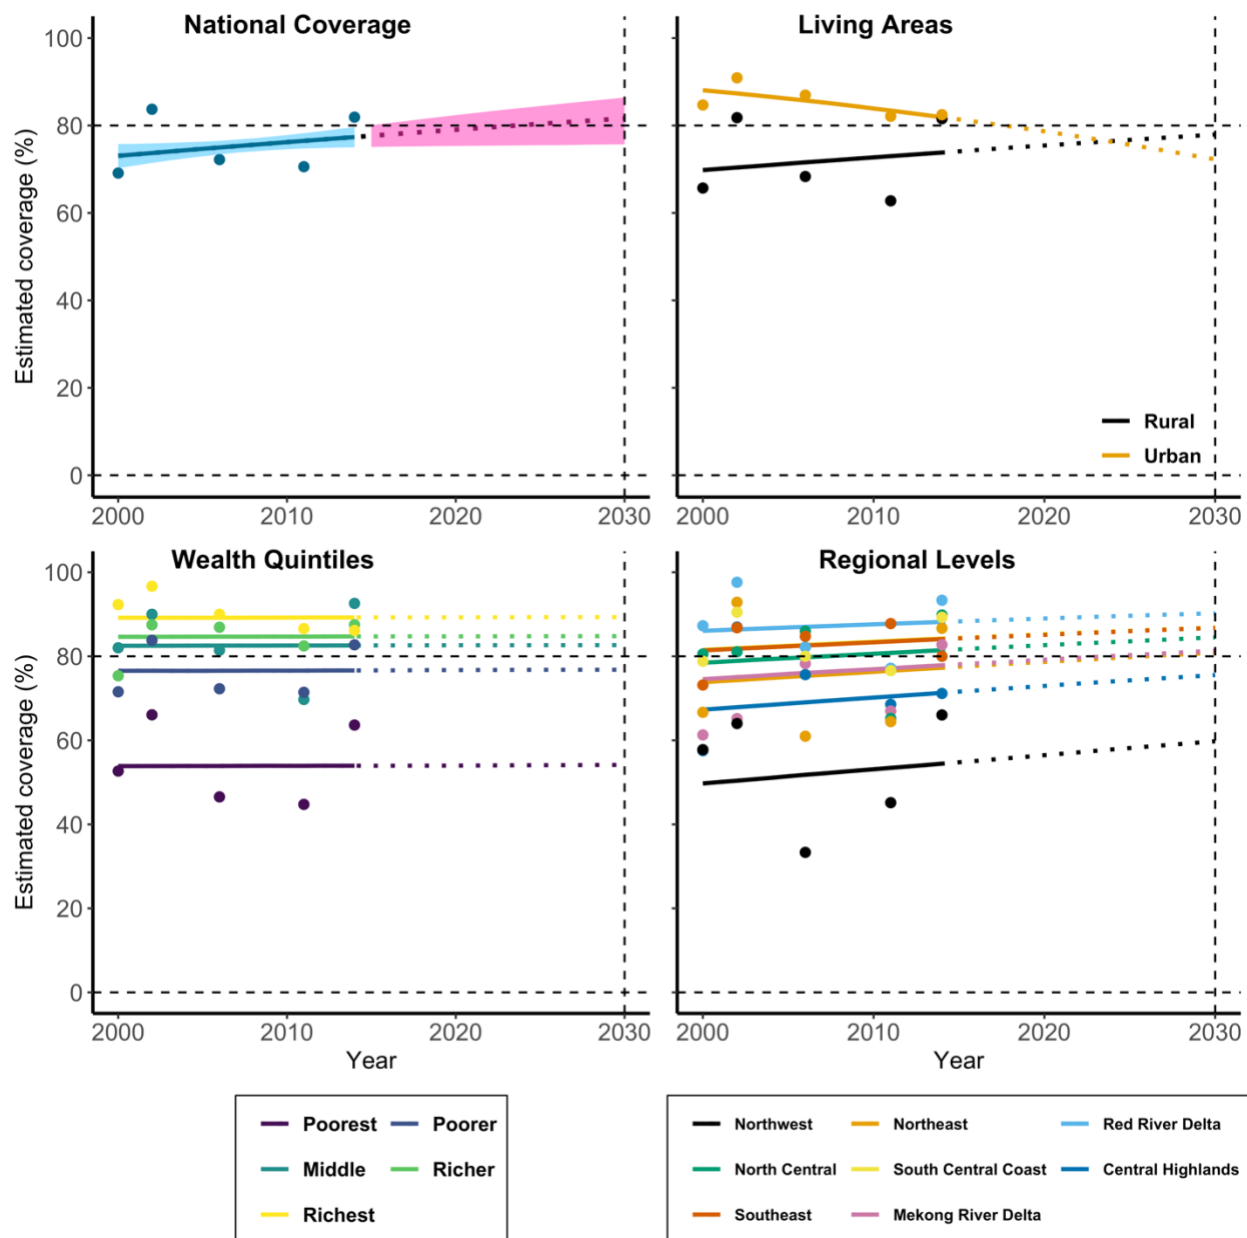

**Fig. S10: Trends in and projections of coverage of Measles Immunization**

Notes: The coloured dots are the observed coverages; The solid lines are the estimated trends to 2014; The dashed lines are the projected trends in future from 2014; The shaded areas are the 95% Credible Intervals; the horizontal dotted lines present the UHC target of 80%.

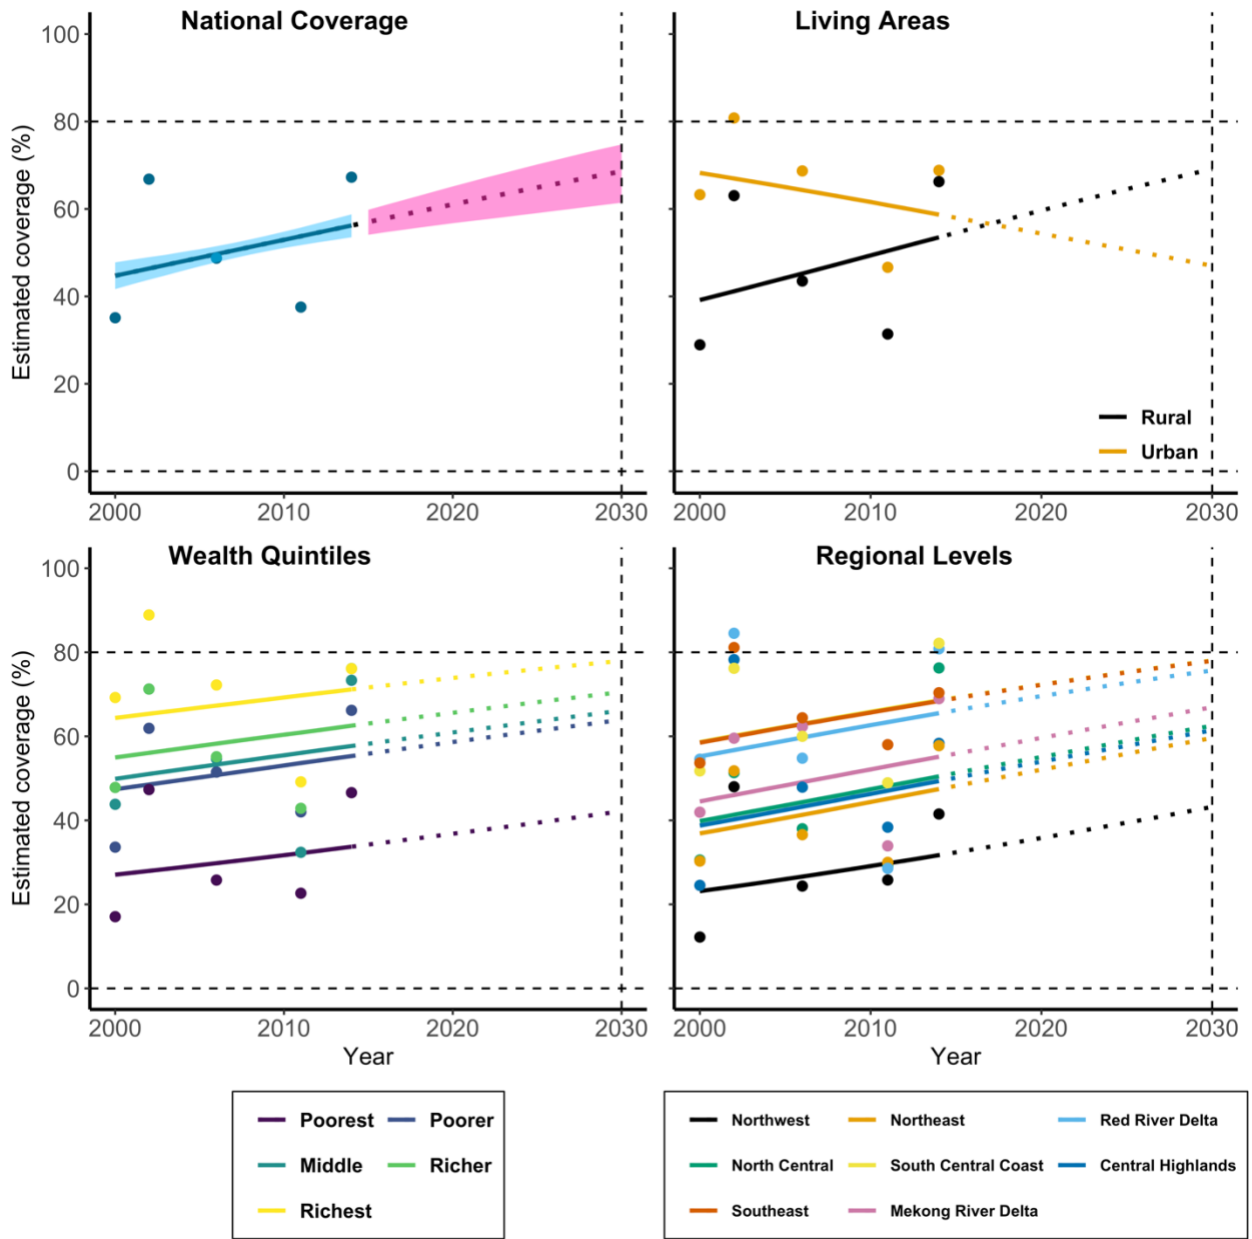

**Fig. S11: Trends in and projections of coverage of Full Immunization**

Notes: The coloured dots are the observed coverages; The solid lines are the estimated trends to 2014; The dashed lines are the projected trends in future from 2014; The shaded areas are the 95% Credible Intervals; the horizontal dotted lines present the UHC target of 80%.

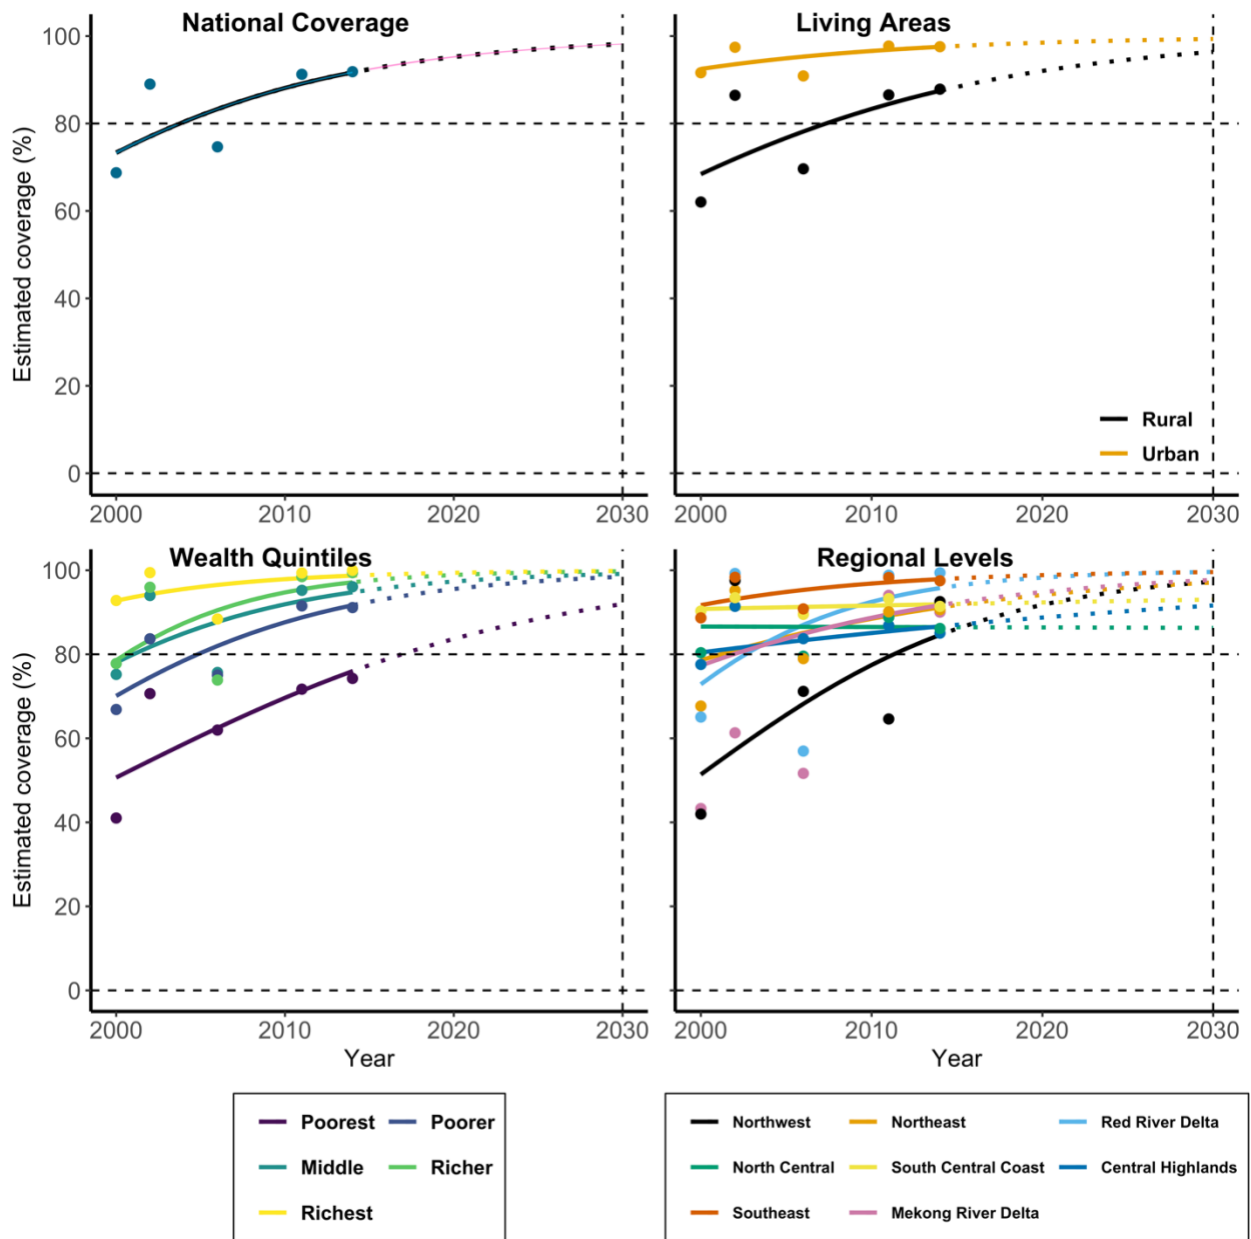

**Fig. S12: Trends in and projections of coverage of Improved water**

Notes: The coloured dots are the observed coverages; The solid lines are the estimated trends to 2014; The dashed lines are the projected trends in future from 2014; The shaded areas are the 95% Credible Intervals; the horizontal dotted lines present the UHC target of 80%.

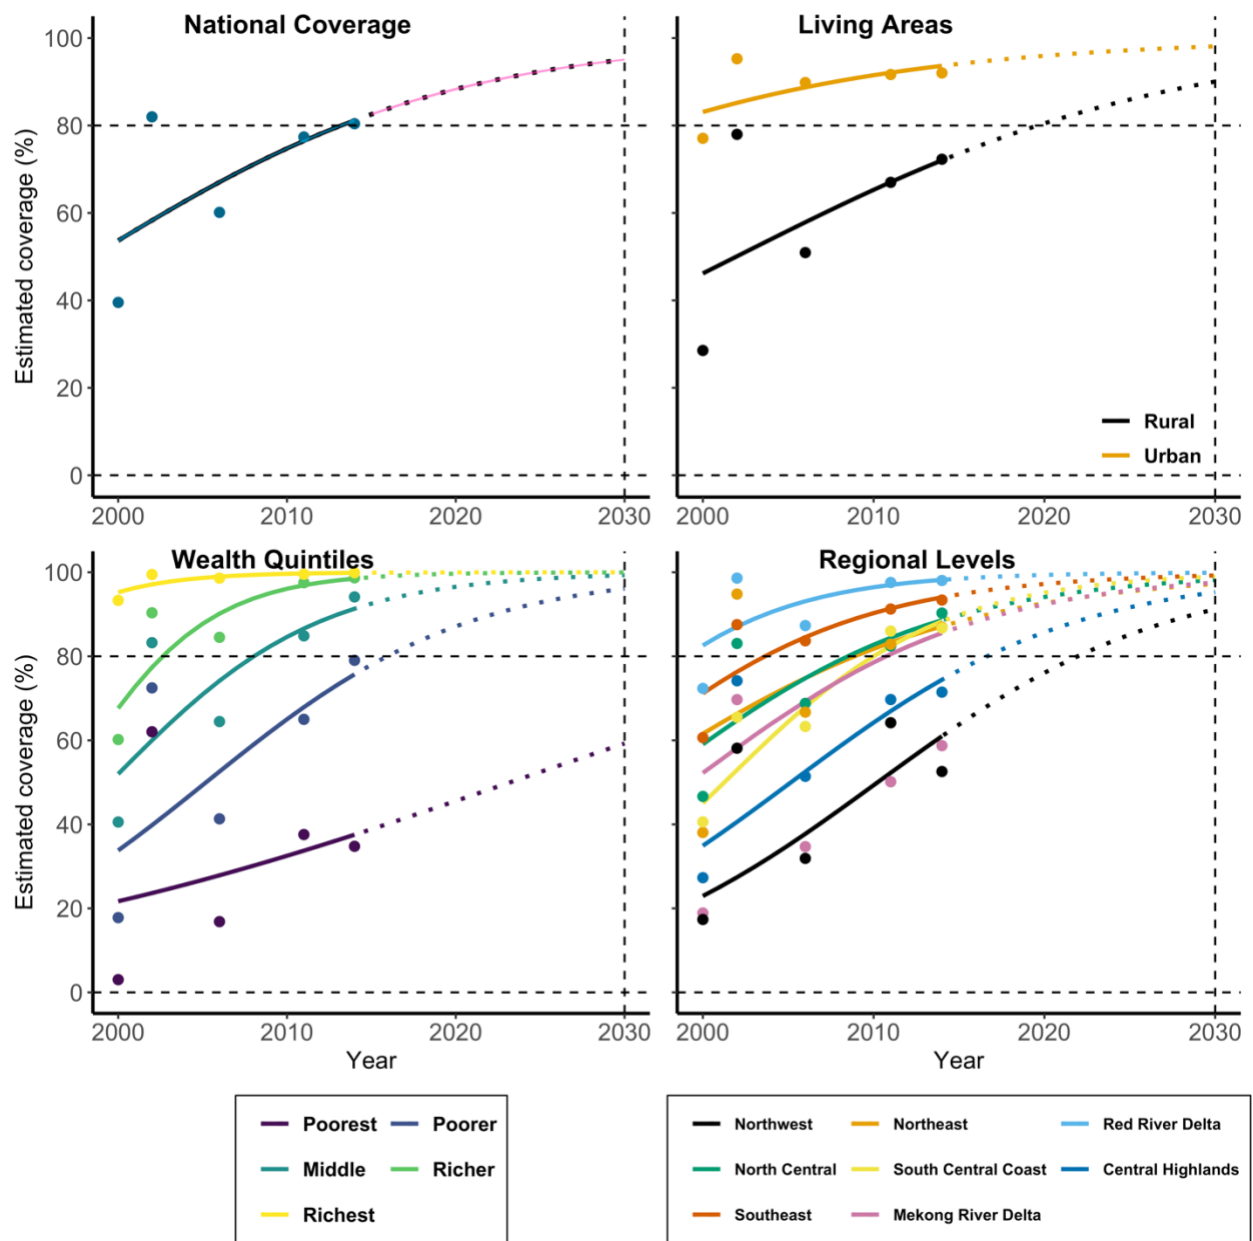

**Fig. S13: Trends in and projections of coverage of Adequate sanitation**

Notes: The coloured dots are the observed coverages; The solid lines are the estimated trends to 2014; The dashed lines are the projected trends in future from 2014; The shaded areas are the 95% Credible Intervals; the horizontal dotted lines present the UHC target of 80%.



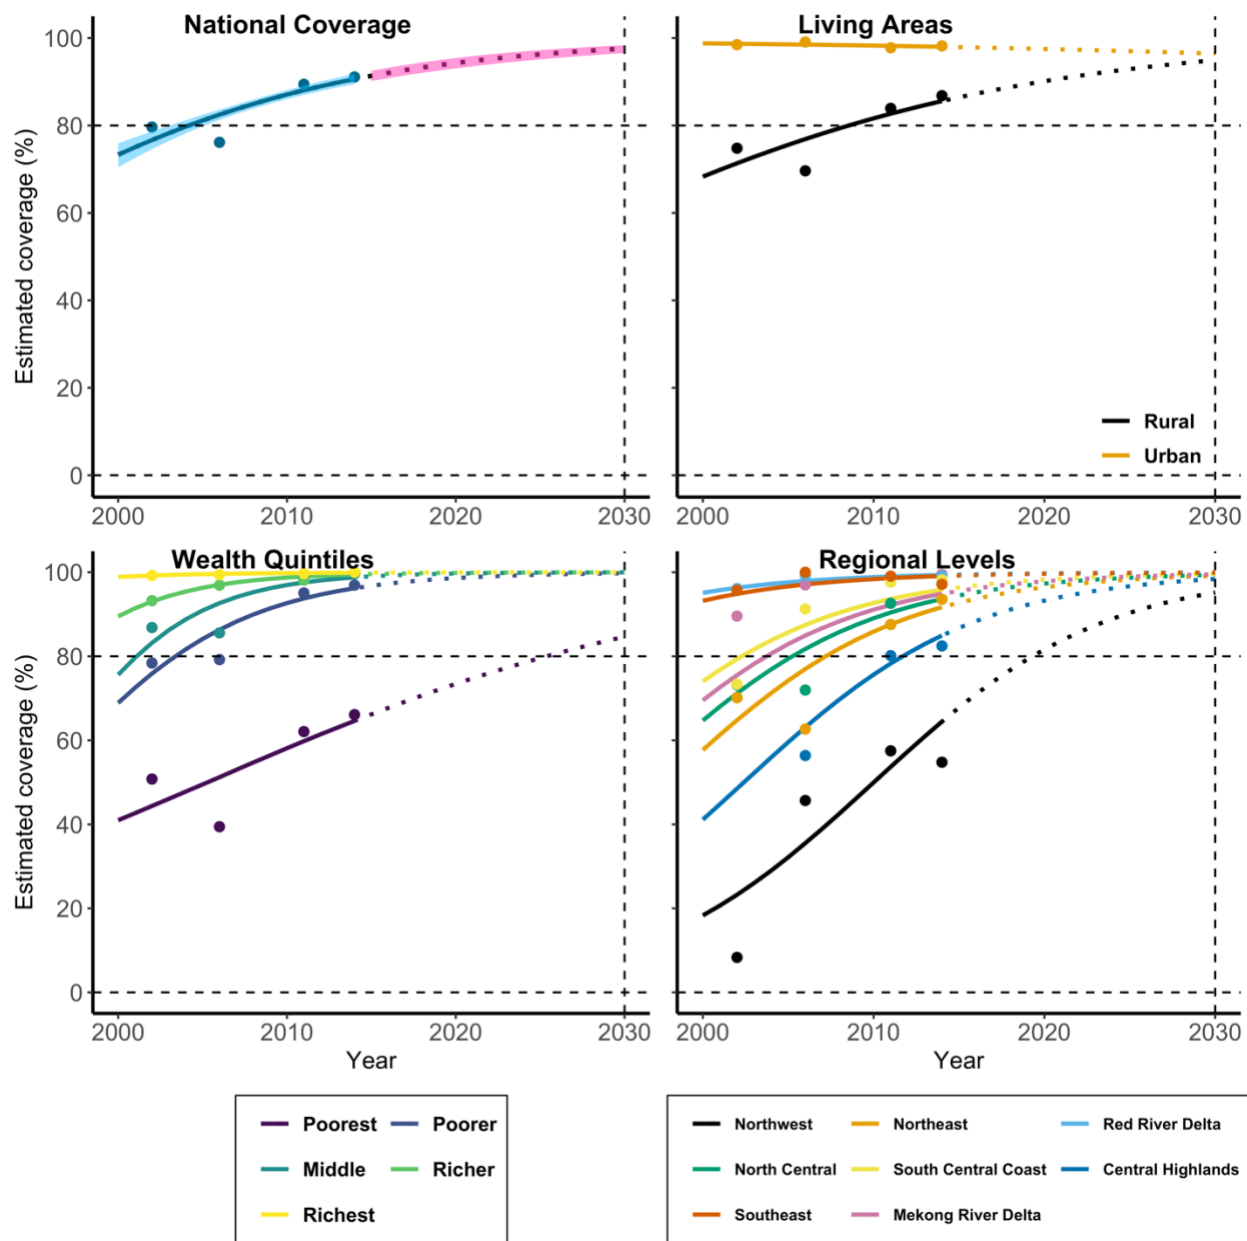

**Fig. S14: Trends in and projections of coverage of Institutional delivery**

Notes: The coloured dots are the observed coverages; The solid lines are the estimated trends to 2014; The dashed lines are the projected trends in future from 2014; The shaded areas are the 95% Credible Intervals; the horizontal dotted lines present the UHC target of 80%.

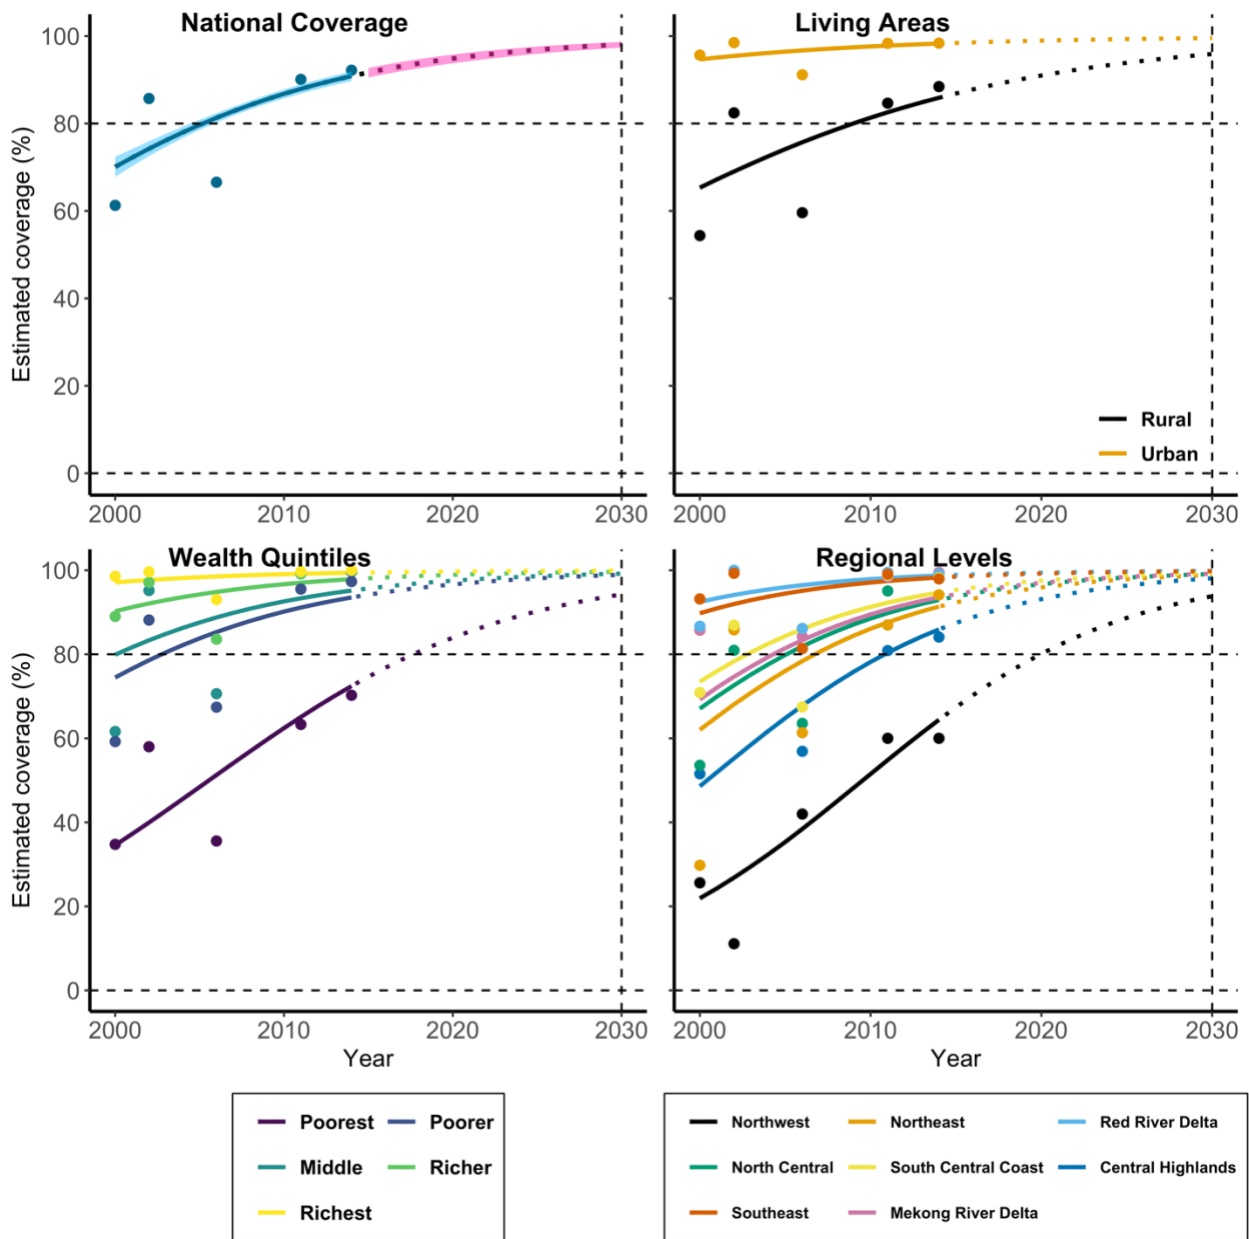

**Fig. S15: Trends in and projections of coverage of Skilled birth attendance**

Notes: The coloured dots are the observed coverages; The solid lines are the estimated trends to 2014; The dashed lines are the projected trends in future from 2014; The shaded areas are the 95% Credible Intervals; the horizontal dotted lines present the UHC target of 80%.

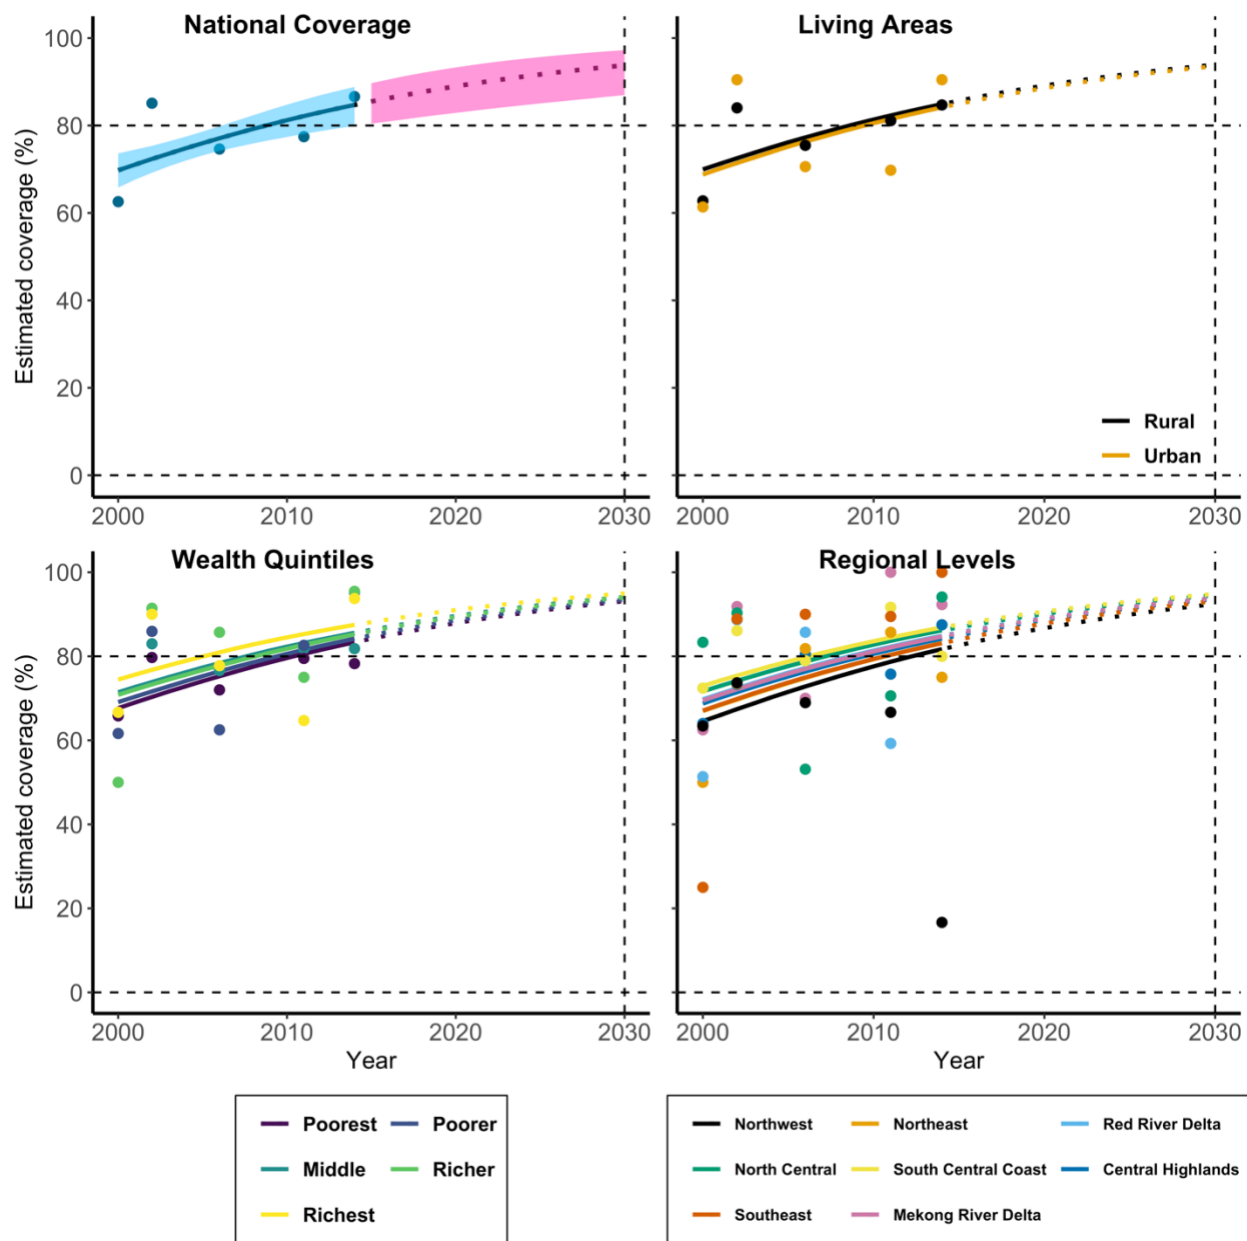

**Fig. S16: Trends in and projections of coverage of Care seeking for pneumonia**

Notes: The coloured dots are the observed coverages; The solid lines are the estimated trends to 2014; The dashed lines are the projected trends in future from 2014; The shaded areas are the 95% Credible Intervals; the horizontal dotted lines present the UHC target of 80%.

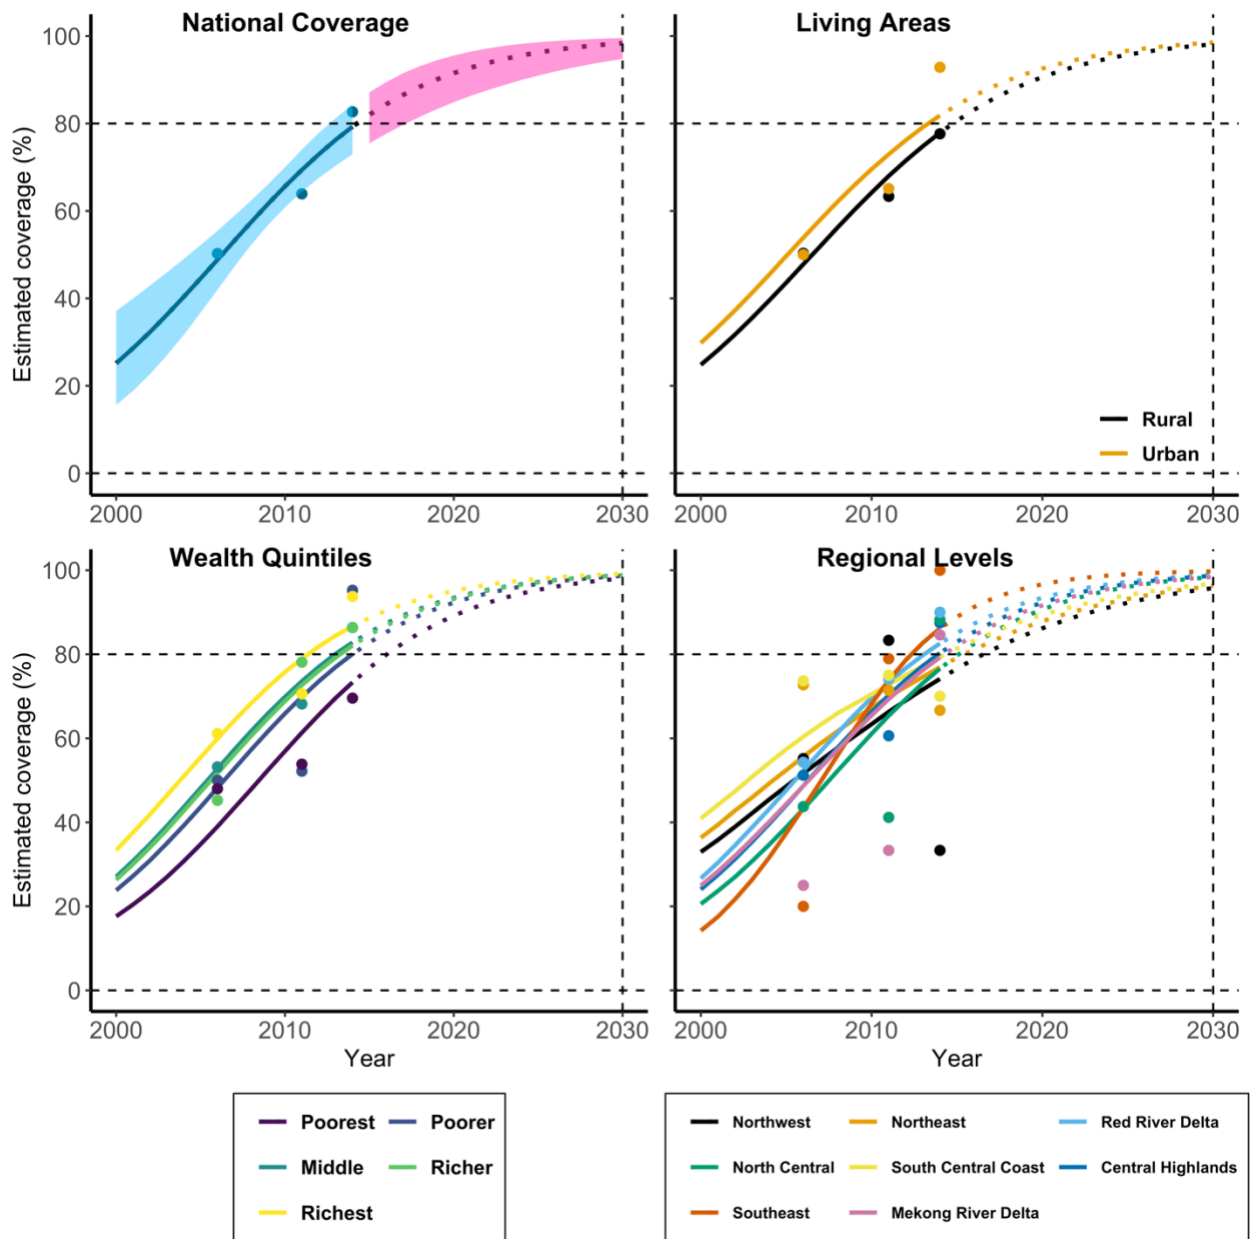

**Fig. S17: Trends in and projections of coverage of ARI treatment**

Notes: The coloured dots are the observed coverages; The solid lines are the estimated trends to 2014; The dashed lines are the projected trends in future from 2014; The shaded areas are the 95% Credible Intervals; the horizontal dotted lines present the UHC target of 80%.

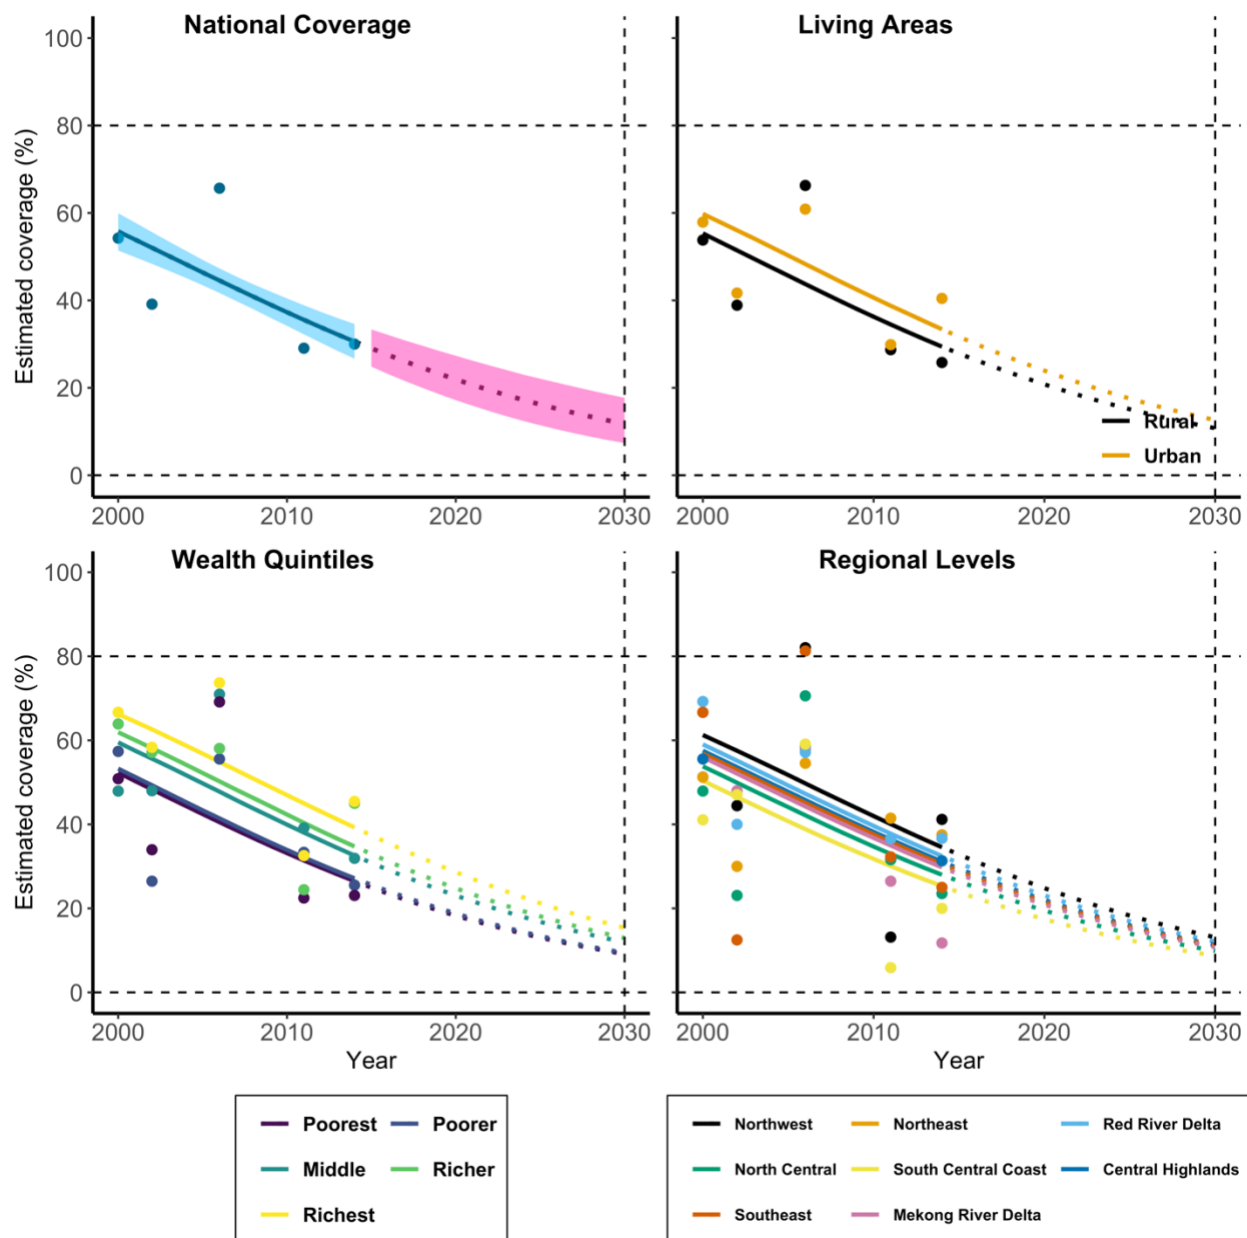

**Fig. S18: Trends in and projections of coverage of Oral rehydration therapy**

Notes: The coloured dots are the observed coverages; The solid lines are the estimated trends to 2014; The dashed lines are the projected trends in future from 2014; The shaded areas are the 95% Credible Intervals; the horizontal dotted lines present the UHC target of 80%.

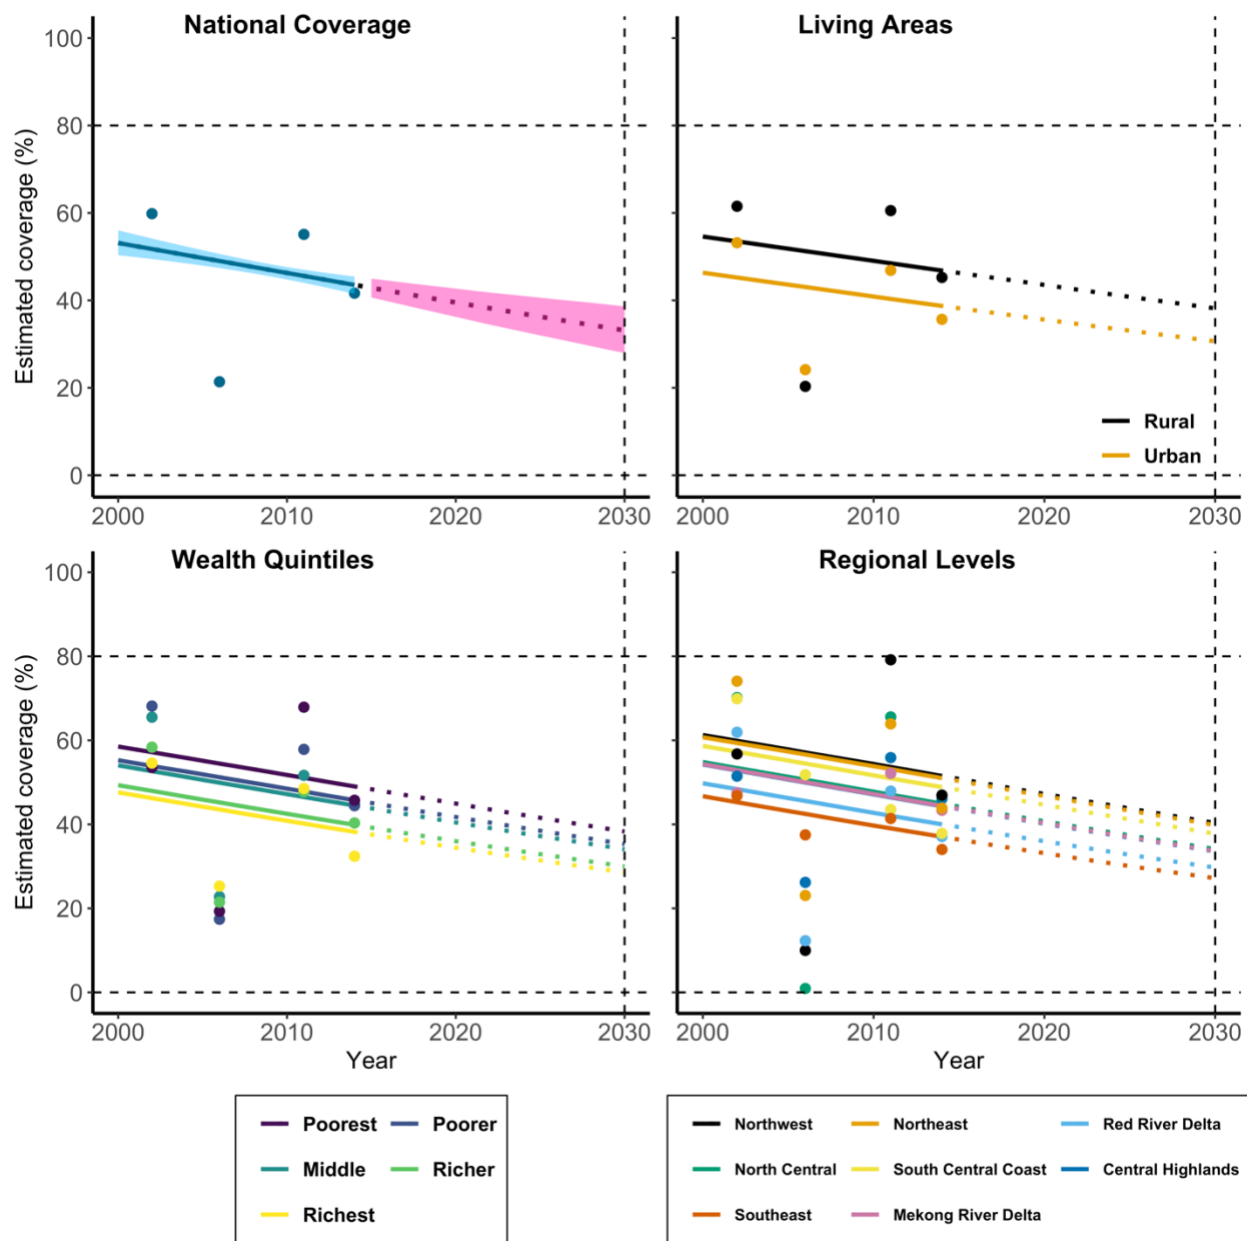

**Fig. S19: Trends in and projections of coverage of Early initiation of breastfeeding**

Notes: The coloured dots are the observed coverages; The solid lines are the estimated trends to 2014; The dashed lines are the projected trends in future from 2014; The shaded areas are the 95% Credible Intervals; the horizontal dotted lines present the UHC target of 80%.

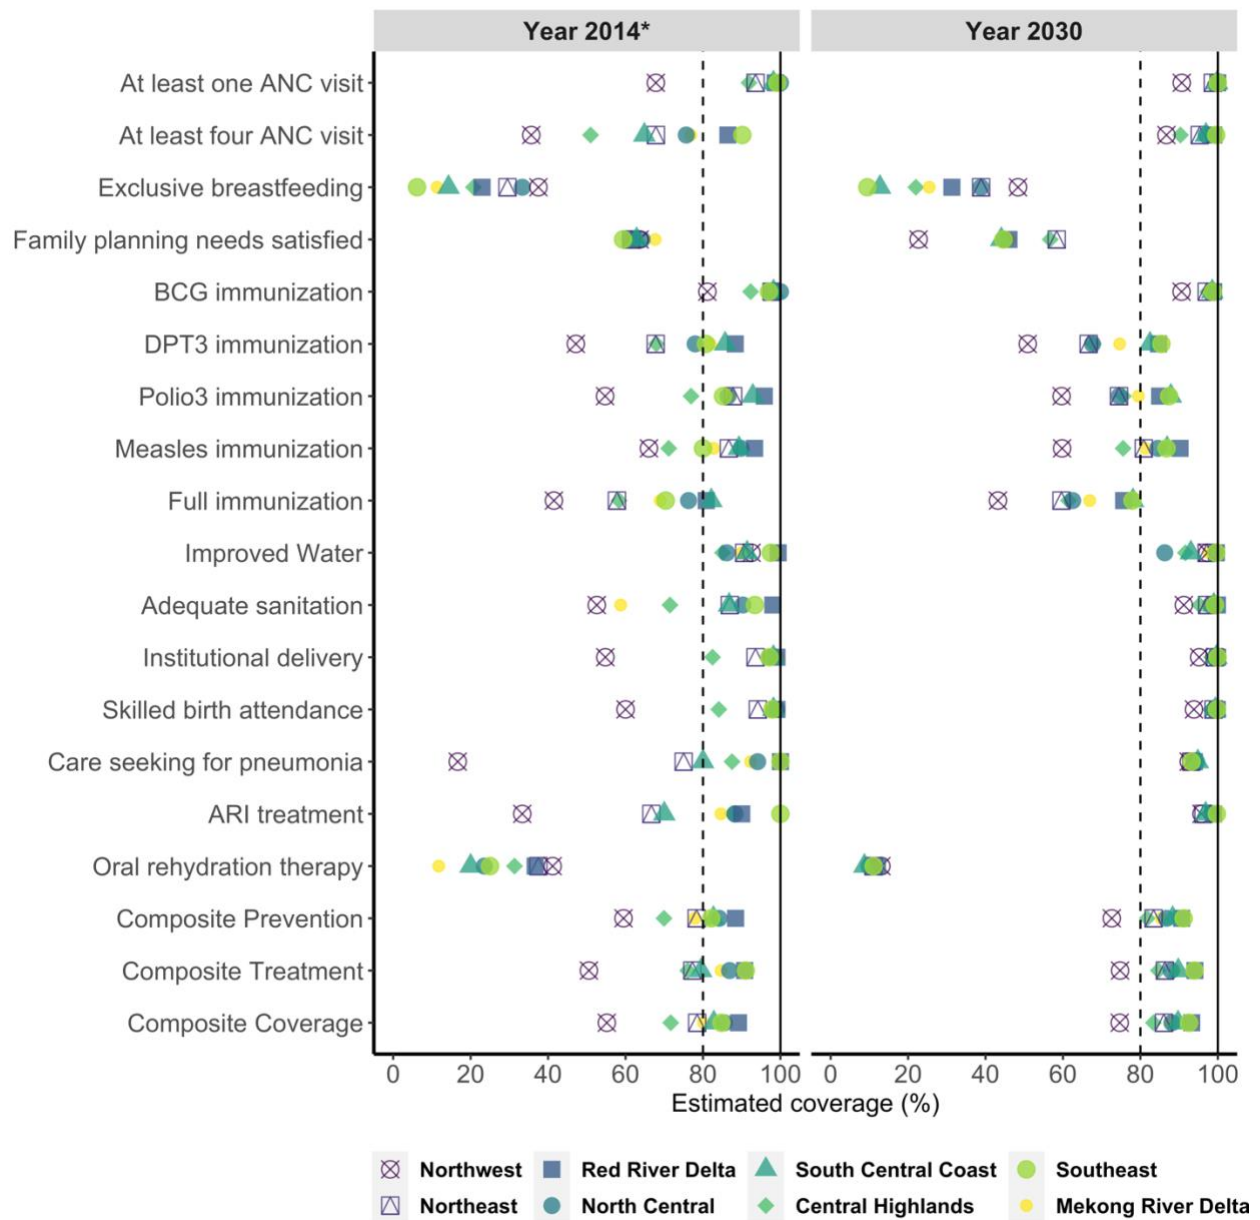

**Fig. S20: RMNCH service in Vietnam in year 2014 and 2030 by regional levels**

The coloured shapes are the estimated and projected values for wealth quintile levels; the horizontal axis shows coverage scales from 0 – 100%; the horizontal dotted lines present the UHC target of 80% coverage; \* Observed coverages;

## References:

- 1 WHO and World Bank. Tracking universal health coverage: First global monitoring report. World Health Organization, 2015.
- 2 WHO and World Bank. Tracking universal health coverage: 2017 Global Monitoring Report. World Health Organization, 2017.
- 3 Polson NG, Scott JG. On the Half-Cauchy Prior for a Global Scale Parameter. *Bayesian Anal* 2012; **7**: 887–902.
- 4 Lewandowski D, Kurowicka D, Joe H. Generating random correlation matrices based on vines and extended onion method. *J Multivar Anal* 2009; **100**: 1989–2001.
- 5 Moser K, Frost C, Leon DA. Comparing health inequalities across time and place--rate ratios and rate differences lead to different conclusions: analysis of cross-sectional data from 22 countries 1991-2001. *Int J Epidemiol* 2007; **36**: 1285–91.
- 6 World Health Organization (WHO). Handbook on health inequality monitoring: with a special focus on low- and middle-income countries. Geneva, 2013.
- 7 Barros AJD, Victora CG. Measuring Coverage in MNCH: Determining and Interpreting Inequalities in Coverage of Maternal, Newborn, and Child Health Interventions. *PLoS Med* 2013; **10**: e1001390.
- 8 O'Donnell O, van Doorslaer E, Wagstaff A, Lindelow M. Analyzing Health Equity Using Household Survey Data: a guide to techniques and their implementation. Washington DC: The World Bank, 2007 DOI:10.1596/978-0-8213-6933-3.
- 9 Kakwani N, Wagstaff A, Van Doorslaer E. Socioeconomic inequalities in health: Measurement, computation, and statistical inference. *J Econom* 1997; **77**: 87–103.
- 10 Victora CG, Fenn B, Bryce J, Kirkwood BR. Co-coverage of preventive interventions and implications for child-survival strategies: Evidence from national surveys. *Lancet* 2005; **366**: 1460–6.
- 11 World Health Organization (WHO). The World Health Report 2005: Make every mother and child count. Geneva, 2005.
